# Supplementary material
Source: MDPI journal article supplement (https://www.mdpi.com/2673-9410/2/3/14)
Supplement: s1 [file s1]

Archive with 5 entries (5 files):
- Supplementary File S1.1.pdf
- Supplementary File S1.xlsx
- Supplementary File S2.1.pdf
- Supplementary File S2.xlsx
- Supplementary File S3.pdf
