# Supplementary material
Source: MDPI journal article supplement (https://www.mdpi.com/2673-9410/2/3/14)
Supplement: s1 [file s1 › Supplementary File S1.xlsx]

## Sheet: data_table
ID	Type of consulted document	Project name (in the original language)	Name of investigators or leads and main collaborators of the project	Number of participants	Sector	Institution	Project description	Start date	End date	Estimated project duration (years)	Estimated date of publication / delivery of results	Study site	Strategic line of the CONACYT Agenda	Objectives	Main results and/or conclusions	Publications and available databases	Institutional collaboration	Number collaborations per project	Number of national collaborations	Number of international collaborations	General comments	Funds ($)	Patents
100	Website	Red de Monitoreo del Sargazo Cancún	Esteban J. Amaro Mauricio	1	Civil society	Red de Monitoreo del Sargazo Cancún	The Sargassum Monitoring Network of Cancun is a tool to inform, prevent and alert about the massive arrival of sargassum on the beaches of Cancun and Riviera Maya.	2018	To date	To date	2018	Cancún; Mayan Riviera	Monitoring, modeling and early warning	To be an informative and useful sargassum monitoring tool for the general public	Facebook group and App under development	NA	NA	0	0	0	https://www.facebook.com/ObservatorioSargazo/?ref=page_internal
110	Website	Observatorio Ciudadano Sargazo	Ehecatl Mendoza Galicia	1	Civil society	Viajefest	The Sargassum Citizen Observatory is updated with the participation of Quintana Roo natives, visitors, tourists, businesses, etc., who share Sargassum photographs on a daily basis.	2018	To date	To date	2018	Cancún; Mayan Riviera	Monitoring, modeling and early warning	Real-time monitoring and reporting of sargassum on the beaches of Cancun and the Riviera Maya, mainly for tourist information	Web page with report and a "traffic light" that reflects the levels of sargassum in the main beaches of the region	NA	NA	0	0	0	https://www.facebook.com/RedSargazo/?ref=page_internal
120	Website	Sistema de Información y Análisis Marino Costero (SIMAR)	Rainer Andreas Ressl; Hansel Caballero Aragón; Sergio Cerdeira Estrada; Raúl Martell Dubois; Jaime Ernesto Valdez Chavarin; Laura Olivia Rosique de la Cruz; Susana Perera Valderrama; Sergio Díaz Martínez; José Rosario López Perea; Diana Raquel Hernández Robles	10	Government sector	Comisión Nacional para el Conocimiento y Uso de la Biodiversidad (CONABIO)	Bioinformatic system for the knowledge and conservation of the seas and coasts. It provides early warning systems for coral bleaching, ecological conditions of marine-coastal ecosystems, and marine algal blooms (pelagic sargassum and phytoplankton)	2019	To date	To date	2019	Gulf of Mexico; Mexican caribbean	Monitoring, modeling and early warning	To develop a robust Sargassum early warning system to aid in decision making	Sargassum Early Warning Satellite System (SATsum). Daily and weekly ocean color indices associated with the presence of floating pelagic sargassum, at 250 m and 1 km of spatial resolution	Cerdeira-Estrada, S., Martell-Dubois, R., Valdéz-Chavarin, J., Rosique-de la Cruz, L., Perera-Valderrama, S., López-Perea, J., Caballero-Aragón, H., Ressl, R. 2018-2020. Sistema de Información y Análisis Marino-Costero (SIMAR). CONABIO, Mexico. Online at: https://simar.conabio.gob.mx	SEMARNAT (Government); SEMAR (Government); CONANP (Government); INECC (Government); CENAPRED (Government); CONACYT (Government); UNAM; ICML; Instituto de Ingeniería UNAM; Instituto de Geografía UNAM; Instituto de Ciencias de la Atmósfera UNAM; Museo de Geofísica UNAM; CINVESTAV; UABC; ECOSUR; CEMIE-Océano; USF (Dependency abroad); MBON (Dependency abroad); OBIS (Dependency abroad); AMERIGEO (Depe…	32	21	11	https://simar.conabio.gob.mx/
130	Peer-reviewed scientific article	ERISNet: deep neural network for Sargassum detection along the coastline of the Mexican Caribbean	Javier Arellano Verdejo; Hugo E. Lazcano Hernandez; Nancy Cabanillas Terán	3	Academic sector	El Colegio de la Frontera Sur (ECOSUR)	This study proposes a novel algorithm for the detection of pelagic sargassum along the Mexican Caribbean coast. Using convolutional and recurrent neural network architectures, a deep neural network (ERISNet) was designed to detect these macroalgae through the support of remote sensing. Aqua-MODIS images are used as the basis for image classification. The designed algorithm achieves 90% sucess in …	2015	2019	4	2019	Quintana Roo	Monitoring, modeling and early warning	To detect Sargassum along the Mexican Caribbean coast using MODIS data and deep learning networks with an accuracy of more than 80%.	This is the first method that uses deep learning to detect pelagic sargassum. ERISNet achieved a 90.08% probability in the accurate classification of pixels with and without sargassum.	Arellano-Verdejo J, Lazcano-Hernandez HE, Cabanillas-Terán N. 2019. ERISNet: deep neural network for Sargassum detection along the coastline of the Mexican Caribbean. PeerJ 7:e6842 http://doi.org/10.7717/peerj.6842	NASA (Dependency abroad)	1	0	1
140	Peer-reviewed scientific article	Crowdsourcing for sargassum monitoring along the beaches of Quintana Roo	Javier Arellano Verdejo; Hugo E. Lazcano Hernandez	2	Academic sector	El Colegio de la Frontera Sur (ECOSUR)	The limitations of remote sensing as a method for sargassum detection and monitoring are mainly the temporal and spatial resolution of the available satellites. Increased human communication capabilities and decreasing costs of technology have improved user access to smart mobile devices. Crowdsourcing has proven successful when information technology and collaborative solutions are combined to s…	2019	2020	1	2020	Quintana Roo	Monitoring, modeling and early warning	To evaluate the usefulness of crowdsourcing as a sargassum monitoring technique	Crowdsourcing is useful in terms of sargassum monitoring. It reduces operational costs and allows obtention of real-time images from a large geographical area.	Arellano-Verdejo, J., & Lazcano-Hernandez, H. E. 2020. Crowdsourcing for Sargassum Monitoring Along the Beaches in Quintana Roo. In GIS LATAM Conference (pp. 49-62). Springer, Cham.	USGS (Dependency abroad); ESA (Dependency abroad)	2	0	2
150	Peer-reviewed scientific article	A satellite remote-sensing multi-index approach to discriminate pelagic Sargassum in the waters of the Yucatan Peninsula, Mexico	Eduardo Cuevas; Abigail Uribe Martínez; María de los Ángeles Liceaga Correa	3	Academic sector	Centro de Investigación y de Estudios Avanzados (CINVESTAV) Mérida, IPN	The purpose of this study is to implement a methodological approach to detect sargassum in an efficient and replicable manner, at a moderate cost. Landsat 8 satellite images were analyzed, from which a classification method was implemented based on several indices. The performance of the classification method were greater than 80%. This approach constitutes an alternative for the systematic detec…	2014	2018	4	2018	Mérida	Monitoring, modeling and early warning	To expand the existing methodological approaches for the detection of sargassum and have a useful and low-cost tool that can be informative for decision makers.	A new methodological framework for the systematic detection of sargassum was presented. Objects such as clouds, cloud shadows and the sun brightness constitute a major challenge for the effective detection of sargassum but this method allows the user to adjust to these conditions.	Eduardo Cuevas, Abigail Uribe-Martínez & María de los Ángeles LiceagaCorrea (2018) A satellite remote-sensing multi-index approach to discriminate pelagic Sargassum in the waters of the Yucatan Peninsula, Mexico, Dependency abroad Journal of Remote Sensing, 39:11, 3608-3627, DOI: 10.1080/01431161.2018.1447162.	CIGOM; University of Florida (Dependency abroad); Pronatura (Civil society); UNACAR	4	3	1
160	Media news (on projects)	Red de Observación del Golfo de México y el Caribe	Xavier Flores Vidal	1	Academic sector	Universidad Autónoma de Baja California (UABC)	This network will allow real-time monitoring of marine currents to help decision-making in cases of contingencies, such as oil spills, sargassum arrivals and algal blooms, dispersion of pollutants and lost ships.	2016	To date	NA	2016	Gulf of Mexico; Mexican caribbean	Monitoring, modeling and early warning	To accurately predict movement of pelagic sargassum through a radar system with high spatio-temporal resolution	NA	NA	CONACYT (Government); CIGOM; SEMAR (Government); GOMA (Dependency abroad); GOMURC (Dependency abroad)	5	3	2	https://www.proceso.com.mx/nacional/2019/6/28/embarcacion-asegurada-por-la-semar-sera-utilizada-para-combatir-el-sargazo-en-el-caribe-mexicano-227130.html
170	eBook/Gazette/Newsletter	Detección de la cobertura de sargazo en la zona costera de Quintana Roo mediante técnicas de percepción remota	Ana Laura Facundo Ponce; Cristina Noyola Medrano	2	Academic sector	Universidad Autónoma de San Luis Potosí (UASLP)	A comparison is made between two methods, one using the traditional Normalized Difference Vegetation Index - NDVI, and another less conventional - Floating Algae Index - FAI. Landsat 8 satellite images captured between 2017 and 2018 were used.	2017	2019	2	2019	Quintana Roo	Monitoring, modeling and early warning	To detect areas with high presence of sargassum using satellite images from the Landsat 8 sensor, applying a comparative analysis between NDVI and FAI.	FAI manages to better highlight areas where sargassum is present.	Noyola Medrano, C. 2019. Aproximaciones tecnológicas de vanguardia en la geomática, geodesia y geoinformática en México. Universidad Autónoma de San Luis Potosí	NA	0	0	0
180	Media news (on projects)	Generación de energía con sargazo	Daniel Camarena Elizondo	1	Private sector	G2E	It is intended to generate electrical energy from a method called hydrothermal carbonization.	2019	To date	To date	2019	Quintana Roo	Potential uses	To install one or several processing plants that can convert sargassum and other organic waste into energy for Quintana Roo	NA	NA	NA	0	0	0	http://quintanaroohoy.com/generaran-energia-con-sargazo/?fbclid=IwAR0GlUCPsW_qhxVSIlOFvO6z5H7J8ioqmypdJpbfXCTi9sitOOGDGfIQUuo
190	Media news (on projects)	Generación de bioplásticos a partir de sargazo	Marco Moreno Sandoval	1	Private sector	Abaplas	Generation of bioplastics made with 30% sargassum for uses in different applications, including ecological housing and railways.	2019	To date	To date	2019	Quintana Roo	Potential uses	To generate bioplastics from sargassum collected on the coast of Quinta Roo	NA	NA	NA	0	0	0	https://quintanaroo.quadratin.com.mx/instalaran-4-plantas-industrializadoras-de-sargazo-en-quintana-roo/
200	Media news (on projects)	Generación de energía y producción de carbón activado a partir de sargazo y otros desechos orgánicos	Jesús Téllez Magaña	1	Private sector	Grupo Transportación Marítima Mexicana (TMM)	The possibilities of producing gas, electricity and activated carbon with sargassum and other organic waste (municipal and from cruise ships) using a sublimation process, are being investigated	2019	To date	To date	2019	Quintana Roo	Potential uses	To generate gas, electricity and activated carbon from sargassum obtained in Quintana Roo	NA	NA	NA	0	0	0	https://quintanaroo.quadratin.com.mx/instalaran-4-plantas-industrializadoras-de-sargazo-en-quintana-roo/
210	Media news (on projects)	Extracción y producción de alginatos	Edurne Balmori Palacios; Hector Alvarez	2	Private sector	Metco	Metco is working to transform sargassum into alginate, a compound used in the textile industry to fix colors and in the food industry (dairy and bakery industries) to give texture. In addition, it is used in the pharmaceutical industry.	2019	To date	To date	2019	Quintana Roo	Potential uses	To obtain alginates from sargassum obtained in Quintana Roo	NA	NA	NA	0	0	0	https://quintanaroo.quadratin.com.mx/instalaran-4-plantas-industrializadoras-de-sargazo-en-quintana-roo/ https://www.globalmedia.mx/articles/Esta-empresa-aprovechar%C3%A1-el-sargazo-para-hacer-yogur
220	Website	Generación de un proceso innovador para la obtención de alginato de sodio y otros productos a partir de Sargassum sp.	Luis Miguel Masiá Nebot	1	Private sector	Alquimar	Alquimar was born in 2016 when the company started with a project that could use sargassum and provide benefits for the country's economy. In 2017, this project was accepted and financed by CONACYT with the objective of creating a sustainable methodology for the extraction of sodium alginate, fucoidans, and the development of fertilizers.	2016	To date	To date	2017	Quintana Roo	Potential uses	To obtain alginates and other products from sargassum obtained in Quintana Roo	Product commercialization	NA	NA	0	0	0	https://alquimar.com.mx/
230	Article or presentation at scientific meeting or congress	Alga sargazo como posible fuente de materias primas para la extracción de carotenoides	Araiza Macías María José; Balandrano Fernández Ana Lucía; Hernández Contreras José Patricio	3	Academic sector	Universidad La Salle	Sargassum contains a pigment called fucoxanthin, which was extracted and identified through maceration and thin-layer chromatography techniques. Fucoxanthin has been studied as a compound with potential benefits to human health.	2018	2019	1	2019	Cancún	Potential uses	To extract carotenoids from sargassum	Sargassum algae contains fundamental pigments that are xanthophylls (fucoxanthin and flavoxanthin) as well as chlorophyll a and c. Therefore, sargassum is considered a good source of fucoxanthin, which can be used for various medical and cosmetic treatments.	Araiza Macías, M. J., Balandrano Fernández, A. L., & Hernández Contreras, J. P. 2019. Alga Sargazo como posible fuente de materias primas para la extracción de carotenoides. Memorias Del XXI Concurso Lasallista de Investigación, Desarrollo e Innovación CLIDi.	NA	0	0	0
240	Thesis	Desarrollo de un polímero a partir de desechos orgánicos	Martha Eréndira Arellanos Huerta	1	Academic sector	Universidad Abierta y a Distancia de México (UNADM)	This project focuses on the development of a biopolymer made from biodegradable products such as sargassum that can be as resistant and elastic as synthetic plastics. These biopolymers will be characterized in terms of their density, permeability, melting point, moisture content and biodegradability.	2019	2019	1	2019	Cozumel	Potential uses	To develop a biopolymer from sargassum with characteristics similar to those of conventional plastics. Use a natural resource (raw material from the region) to solve an environmental problem.	A bioplastic with similar characteristics as of those of conventional plastic was obtained.	Arellanos-Huerta, M.E. 2019. Desarrollo de un biopolímero a partir de residuos orgánicos. Bachelors Thesis. Universidad Abierta y a Distancia de México.	Instituto Partenón de Cozumel	1	1	0
250	Thesis	Aplicación de extractos hidrotérmicos de macroalgas como bioestimulantes en plantas de tomate	Eva Carmona Rodríguez	1	Academic sector	Universidad Autónoma Agraria Antonio Narro (UAAAN)	The biostimulant effect of hydrothermal extracts of three Mexican marine macroalgae on tomato plants was studied. The research began with the characterization (total sugars, phenols, proteins, antioxidant capacity, sulfates, phytohormones, monosaccharide and mineral profile) of the macroalgae Macrocystis pyrifera, Sargassum spp. and Eisenia arborea. The extract that showed the best results for to…	NA	2019	NA	2019	NA	Potential uses	To evaluate different substrates with macroalgae extracts for the growth and development of tomato	Substrates that included sargassum extracts, were optimal for the growth and development of the tomato plant.	Eva Carmona Rodríguez. 2019. Aplicación de extractos hidrotérmicos de macroalgas como bioestimulantes en plantas de tomate. Master Thesis. Universidad Autónoma Agraria Antonio Narro.	NA	0	0	0	Composition at a species level is unknown in ALGAENZIMS
260	Description of funded projects	Sargazo en el Caribe: Uso para incremental los niveles de yodo en huevos de consumo humano para prevenir la deficiencia de este elemento en la población mexicana.	María Margarita Casas Valdez; Silvia Carrillo Domínguez; Alejandra Piñón Gimate; Pedro Gilberto González Ramírez; Ernesto Ávila González	5	Academic sector	Centro Interdisciplinario de Ciencias Marinas (CICIMAR) IPN	Sargassum have high concentrations of minerals (more than 30%). One of those components is iodine, which have hypocholesterolemic properties. On the other hand, egg is of great importance as food for the Mexican population. This is why it is proposed to use Sargassum as food for laying hens to produce iodine biofortified eggs with low cholesterol content.	2019	To date	To date	2021	NA	Potential uses	To evaluate sargassum as food for laying hens	NA	NA	NA	0	0	0
270	Media news (on projects)	El sargazo genera electricidad	Norma Patricia Muñoz Sevilla	1	Academic sector	Centro Interdisciplinario de Investigaciones y Estudios sobre Medio Ambiente y Desarrollo (CIIEMAD) IPN	Due to its potential to generate methane gas, sargassum can produce energy through a biodigestion process	2019	To date	To date	2021	NA	Potential uses	To analyze the chemical content of sargassum and evaluate its use in generation of methane gas for energy use.	NA	NA	NA	0	0	0	https://www.ipn.mx/imageninstitucional/comunicados/ver-comunicado.html?y=2019&n=26
280	Media news (on projects)	Biofertilizantes a base de sargazo	Iris Aurora Nava Jiménez	1	Academic sector	Universidad Politécnica de Quintana Roo (UPQROO)	A biofertilizer is produced using sargassum found in the Mexican Caribbean.	2019	To date	To date	2019	Quintana Roo	Potential uses	To analyze the effectiveness of a sargassum-based biofertilizer on plant germination, growth and rooting. Create a product that competes in the market	NA	NA	NA	0	0	0	https://laverdadnoticias.com/quintanaroo/Crean-Biofertilizantes-con-sargazo-en-Quintana-Roo-20190524-0088.html
290	Description of funded projects	Caracterización bromatológica y análisis de metales pesados para el manejo adecuado del sargazo que llega a las costas de Quintana Roo	Dr. Alberto Pereira Corona	1	Academic sector	Universidad de Quintana Roo (UQROO)	The general objective is to carry out a bromatological characterization and analysis of heavy metals for the proper management and use of sargassum.	2020	To date	To date	2021	Quintana Roo	Potential uses	To perform a bromatological characterization and analysis of heavy metals for an adecuate management of sargassum.	NA	NA	NA	0	0	0
300	Website	Tranformación de sargazo en celulosa y biofertilizantes	Héctor Romero Morales; Fayco Sayd Amateco Rivero	2	Private sector	Dianco	Dianco activities range from harvest, reception and cleaning of sargassum collected on the sea or beach, to the generation of final products for comercialization. These products are a) Cellulose (in various presentations), b) biofertilizers, c) bioplastics.	2020	To date	To date	2020	Quintana Roo	Potential uses	To use the sargassum from Quintana Roo and transform it into cellulose and biofertilizer	NA	NA	NA	0	0	0	http://gpomd.com/dianco/nosotros		1
310	Media news (on projects)	Crean vasos, platos y calentadores con sargazo en Puerto Morelos	Andrés Muñoz López	1	Private sector	EnerGryn	Different products are being made bioplastics made with 30% of sargassum (of its total composition)	2019	To date	To date	2019	Quintana Roo	Potential uses	To use sargassum to create glasses, plates, biodegradable products and a water heaters. This water heater is a solar and electric hybrid and is made of polypropylene and sargassum bioplastic. Adding sargassum fiber increases the pressure-bearing capacity by 25 percent	NA	NA	NA	0	0	0	https://laverdadnoticias.com/quintanaroo/Crean-vasos-platos-y-un-calentador-con-Sargazo-en-Puerto-Morelos-20190508-0109.html
320	Peer-reviewed scientific article	N-doped porous carbon from Sargassum spp. as metal-free electrocatalysts for oxygen reduction reaction in alkaline media	Beatriz Escobar; K.Y. Pérez Salcedo; I.L. Alonso Lemus; D. Pacheco; Romeli Barbosa	5	Academic sector	Centro de Investigación Científica de Yucatán (CICY)	The use of Sargassum spp. as raw material for the synthesis of metal-free electrocatalysts is explored. The physicochemical and electrochemical properties of pyrolyzed, activated and doped carbons synthesized from sargassum are studied. Biocarbons developed from Sargassum spp. are a promising cathode material for fuel cells.	2015	2017	2	2017	Cancún; Playa del Carmen	Potential uses	To study the physicochemical and electrochemical properties of N-doped carbons derived from Sargassum spp. and their performance as a metal-free electrocatalyst for use in fuel cells.	Biocarbons developed from sargassum collected on the beaches of Quintana Roo have resulted in a promising cathode material for fuel cells.	Escobar, B., Pérez-Salcedo, K. Y., Alonso-Lemus, I. L., Pacheco, D., & Barbosa, R. 2017. N-doped porous carbon from Sargassum spp. as metal-free electrocatalysts for oxygen reduction reaction in alkaline media. Dependency abroad Journal of Hydrogen Energy, 42(51), 30274-30283.	CINVESTAV; UQROO	2	2	0
330	Thesis	Generación de energía sustentable mediante electrocatalizadores a partir del Sargassum sp. para la reacción de reducción de oxígeno en medio alcalino	Kehila Yehudá Pérez Salcedo	1	Academic sector	Centro de Investigación Científica de Yucatán (CICY)	In this work, 11 electrocatalysts are synthesized from sargassum by thermochemical methods. These materials are promising for applications in energy generation and storage.	2015	2019	4	2019	Playa del Carmen	Potential uses	To synthesize and characterize metal-free electrocatalysts derived from sargassum for the ORR oxygen reduction reaction in alkaline fuel cells	Synthesized electrocatalysts have potential as capacitor electrodes in water purification, CO2 and metal adsorption, and hydrogen storage applications.	Pérez-Salcedo, K. Y. 2019. Generación de energía sustentable mediante electrocatalizadores a partir del Sargassum sp. para la reacción de reducción de oxigeno en medio alcalino. Tesis de doctorado. CICY, Yucatán	CINVESTAV; UQROO; ASU (Dependency abroad); XJTU (Dependency abroad)	4	4	0
340	Peer-reviewed scientific article	N-Doped porous carbon from Sargassum spp. as efficient metal-free electrocatalysts for O2 Reduction in Alkaline Fuel Cells	K. Y. Pérez Salcedo; Xuan Shi; Arunachala Mada Kannan; Romeli Barbosa; Patricia Quintana; Beatriz Escobar	6	Academic sector	Centro de Investigación Científica de Yucatán (CICY)	This work reports the synthesis of N-doped porous carbon from Sargassum spp. as a low-cost alternative for the production of electrocatalysts for the oxygen reduction reaction (ORR). The results indicate that these electrocatalysts are an alternative to the sargassum accumulation problem in the Caribbean.	2015	2019	4	2019	Playa del Carmen	Potential uses	To synthesize and characterize metal-free electrocatalysts derived from sargassum for the ORR oxygen reduction reaction in alkaline media in fuel cells	The synthesized electrocatalysts have potential as capacitor electrodes.	Pérez-Salcedo, K. Y., Shi, X., Kannan, A. M., Barbosa, R., Quintana, P., & Escobar, B. 2019. N-Doped Porous Carbon from Sargassum spp. as Efficient Metal-Free Electrocatalysts for O2 Reduction in Alkaline Fuel Cells. Energies, 12(3), 346.	CINVESTAV; UQROO; ASU (Dependency abroad)	3	3	0
350	Media news (on projects)	Sargazo para la producción de cosméticos	Jesús Antonio Jáuregui Jáuregui	1	Academic sector	Tecnológico de Monterrey	Nexo is a project that intends to obtain alginates from sargassum to use it in the industry of cosmetics.	2020	To date	To date	2021	Quintana Roo	Potential uses	To obtain alginates and fucoidans from sargassum, providing an alternative use of this macroalgae	NA	NA	NA	0	0	0	https://www.dineroenimagen.com/management/estudiantes-del-tec-de-monterrey-usan-sargazo-para-hacer-cosmeticos/119879
360	Peer-reviewed scientific article	Caracterización física y química de materiales orgánicos para sustratos agrícolas	Salomé Gayosso Rodríguez; Lizette Borges Gómez; Eduardo Villanueva Couoh; Maximiano A. Estrada Botello; René Garruña	5	Academic sector	Instituto Tecnológico de Conkal (ITConkal)	Different materials were evaluated in the composition of substrates, including sargassum.	2016	2018	2	2018	Mérida	Potential uses	In Yucatan, there are organic materials that could meet the physical and chemical parameters necessary for growing plants. Therefore, the objective of this study was to characterize the physical and chemical properties of six organic materials available in the region to use them as components of substrates for plant cultivation.	The sargassum substrate showed high contents of K and Mg. However, due to its high Na content, it was not considered a suitable substrate in this study.	Gayosso-Rodríguez, S., Borges-Gómez, L., Villanueva-Couoh, E., Estrada-Botello, M. A., & Garruña, R. 2018. Caracterización física y química de materiales orgánicos para sustratos agrícolas. Agrociencia, 52(4), 639-652.	UJAT	1	1	0
370	Peer-reviewed scientific article	Elaboración de productos cosméticos con algas marinas por mujeres emprendedoras del Municipio de Sinanché, Yucatán	Alpuche Victoria; Jorge Santos Flores; Magaly Luit González	3	Academic sector	Universidad Autónoma de Yucatán (UAY)	An action-research process was developed with a group of women from the community of Sinanché, Yucatán. The objective was to train the participants in the elaboration of shampoo and cosmetic soap using seaweed. The participants elaborated the products and added aspects of commercial presentation (logo, label and packaging).	2014	2016	2	2016	Mérida	Potential uses	Taking into account the beneficial properties and potential uses of marine algae, the H. Ayuntamiento de Sinaché requested the Yucatan government to train organized groups of people in the use of marine macroalgae for the production of cosmetic products for the economic benefit of the community.	Members of the working group were able to identify the species of algae, including sargassum. They were able to extract carrageenan and make formulas and products that they later marketed. A broader panorama was developed about the use of local resources to strengthen productive activities.	Alpuche, V., Santos-Flores, J y Luit-González, M. 2016. Elaboración de productos cosméticos con algas marinas por mujeres emprendedoras del Municipio de Sinanché, Yucatán. Bioagrociencias. 9, 7-16.	NA	0	0	0
380	Peer-reviewed scientific article	Developing a CNT-SPE Sensing Platform Based on Green Synthesized AuNPs, Using Sargassum sp	Fanny J. González Fuentes; Gustavo A. Molina; Rodolfo Silva; José Luis López Miranda; Rodrigo Esparza; Angel R. Hernandez Martinez; Miriam Estevez	7	Academic sector	Centro de Física Aplicada y Tecnología Avanzada (CFATA), UNAM	The detection and quantification of nanoparticles and other molecules plays an important role in biomedical research, particularly in electrochemical detection platform technologies. In this study, gold nanoparticles (AuNP) were obtained by green synthesis from Sargassum sp. AuNPs were used to modify a carbon nanotube screen-printed electrode (CNT-SPE) to assemble a novel portable electrochemical…	NA	2020	NA	2020	Mexican caribbean	Potential uses	To carry out the green synthesis of AuNPs using an aqueous extract of sargassum as a reducing and stabilizing agent. The AuNPs obtained will be used for the assembly of a portable electrochemical sensor for glucose detection.	AuNPs were successfully synthesized from sargassum. The glucose detector developed from this process is a competitive option in the market.	González-Fuentes, F. J., Molina, G. A., Silva, R., López-Miranda, J. L., Esparza, R., Hernandez-Martinez, A. R., & Estevez, M. 2020. Developing a CNT-SPE Sensing Platform Based on Green Synthesized AuNPs, Using Sargassum sp. Sensors, 20(21), 6108.	NA	0	0	0
390	Peer-reviewed divulgation article	Seaweeds as Potential Plant Growth Stimulants for Agriculture in Mexico	Rosalba Mireya Hernández Herrera; Fernando Santacruz Ruvalcaba; Diego Ramón Briceño-Domínguez; Dania Andrea Di Filippo-Herrera; Gustavo Hernández Carmona	5	Academic sector	Universidad de Guadalajara (UDG)	One of the promising areas in agriculture is the use of biologically active substances as plant growth stimulants, obtained from local raw materials. In Mexico, seaweed can be considered as a local economic resource with a commercial exploitation potential as a biostimulant for plant growth.	NA	2018	NA	2018	NA	Potential uses	To provide an overview of the application of seaweed extracts in Mexican agriculture.	Marine algae from Mexico have a potential for the isolation of biologically active compounds that could increase agricultural productivity.	Hernández-Herrera R. M., F. Santacruz-Ruvalcaba, D. R. Briceño-Domínguez, D. A. Di Filippo-Herrera and G. Hernández-Carmona. 2018. Seaweeds as Potential Plant Growth Stimulants for Agriculture in Mexico. Hidrobiológica 28 (1): 129-140.	TecNM Felipe Carrillo Puerto; CICIMAR	2	2	0
400	Website	Fertilizante y papel hecho con sargazo	Mauricio Gómez Hernández	1	Private sector	Salgax	SALGAX is a 100% Yucatecan company whose mission is to offer high-quality biotechnological products derived from the marine environment, for use in various sectors such as agriculture, pharmaceuticals, cosmetics, industry, among others. It currently produces seaweed fertilizers (from sargassum) for foliar application.	2015	To date	To date	2015	Mérida	Potential uses	To develop products such as paper, fertilizers, etc., made from sargassum	Paper and products for agriculture and gardening made with sargassum	NA	NA	0	0	0	www.salgax.com
410	Media news (on projects)	Uso de sargazo para el crecimiento de hongos comestibles	Jesús Antonio Chay Casanova	1	Academic sector	Instituto Tecnológico de Chetumal (ITCH)	The cultivation of mushrooms could become an alternative for the use of sargassum	2019	To date	To date	2020	Quintana Roo	Potential uses	To test an alkaline substrate based on sargassum for the cultivation mushrooms	NA	NA	NA	0	0	0	https://laverdadnoticias.com/quintanaroo/Investiga-Tecnologico-de-Chetumal-utilizacion-del-sargazo-para-cultivar-hongos-comestibles-20190216-0139.html
420	Media news (on projects)	Sargazo para biocombustibles, una nueva industria que aprovecha un problema	Francisco de Asís Silva Bátiz	1	Academic sector	Universidad de Guadalajara (UDG)	A process for obtaining biofuels (bioalcohol and biogas) is developed. Futheremore, sargassum is explored in the elaboration of pasture for livestock or in the production of compost.	2018	To date	To date	2018	Quintana Roo	Potential uses	To transform the sargassum into useful products.	NA	NA	Vive Planeta Azul A.C (Civil society); IPN	2	2	0	https://www.milenio.com/ciencia-y-salud/medioambiente/sargazo-para-biocombustible-nueva-industria-que-aprovecha-el-desastre
430	Article or presentation at scientific meeting or congress	Enzymatic hydrolysis of the seagrass fraction present in the biomass known as "Sargazo de Arribazon" collected on the Yucatan coast	Lourdes A. Pasos Carballo; Sara Solís Pereira; Gabriel Lizama Uc; Jorge Tamayo Cortes; Gerardo Rivera Muñoz	5	Academic sector	Instituto Tecnológico de Mérida (ITM)	The chemical components of sargassum and seagrass are a mixture of cellulose, hemicellulose and lignin. This work focuses on the implementation of an enzymatic process to carry out the hydrolysis of this biomass to generate a macerate rich in fermentable sugars that can later be used in the production of metabolites of industrial interest.	NA	2018	NA	2018	Puerto de Progreso; Puerto Chelén	Potential uses	Obtain fermentable sugars from the hydrolysis of sargassum	A macerate with 0.711 g/l of reducing sugars, expressed as glucose, was obtained from the hydrolysis of sargassum	Pasos-Carballo Lourdes A., Solís-Pereira Sara, Lizama-Uc Gabriel, Tamayo-Cortes Jorge y Rivera-Muñoz Gerardo. 2018. Enzymatic hydrolysis of sea grass fraction present in biomass known as "Sargazo de Arribazon" collected in the Yucatan Coast. Journal Of Bioengineering And Biomedicine Research. 2: 331.	NA	0	0	0
440	Media news (on projects)	El sargazo se usa para construir casas	Omar Vázquez	1	Private sector	BlueGreen	Bricks made with sargassum are ecological, resistant, thermal and improves the acoustics of a home. It is also cheaper than conventional ones, reducing costs by 30 percent.	2018	To date	To date	2018	Quintana Roo	Potential uses	To produce bricks made with sargassum that meet Mexican standards and are more resistant than traditional ones	A house was built with bricks made with sargassum.	NA	NA	0	0	0	https://www.jornada.com.mx/2019/07/21/economia/016n1eco
450	Website	Calzado hecho a base de sargazo y plástico reciclado	Jorge Castro Ramos	1	Private sector	Renovare	RENOVARE OCEAN OVA creates a shoe line made with sargassum and plastic bottles to solve an important environmental problem	2018	To date	To date	2018	Quintana Roo	Potential uses	To develop a shoe made with sargassum and plastic bottles.	Marketing and production of a line of footwear made with sargassum	NA	NA	0	0	0	https://www.renovareco.com/es/?v=6f4f56f1b600		1
460	Peer-reviewed scientific article	Evaluation of a dynamic bioremediation system for the removal of metal ions and toxic dyes using Sargassum Spp.	J. Luis López Miranda; Rodolfo Silva; Gustavo A. Molina; Rodrigo Esparza; A. R. Hernandez Martinez; J. Hernández Carteño; Miriam Estévez	7	Academic sector	Centro de Física Aplicada y Tecnología Avanzada (CFATA), UNAM	This work presents the results obtained in the design and manufacture of a simple and economical ecological filter based on Sargassum spp., for the elimination of organic and inorganic toxic substances	NA	2020	NA	2020	Mexican caribbean	Potential uses	To use the sargassum that reaches the Mexican Caribbean coast in a filtering system that can be used for water treatment.	The tested toxic substances were organic dyes (methyl blue, methyl orange, and methyl red) and lead. The removal rates were 100%, 65% and 25% for methylene blue, methyl red and methyl orange, respectively, and in the case of lead, values ​​of up to 95% were obtained. These results demonstrate the efficiency of the proposed sargassum filtration system, which can be industrially scalable for the tr…	López-Miranda, J. L., Silva, R., Molina, G. A., Esparza, R., Hernandez-Martinez, A. R., Hernández-Carteño, J., & Estévez, M. 2020. Evaluation of a Dynamic Bioremediation System for the Removal of Metal Ions and Toxic Dyes Using Sargassum Spp. Journal of Marine Science and Engineering, 8(11), 899.	UPEG; ICML; Instituto de Ingeniería UNAM	3	3	0
470	Article or presentation at scientific meeting or congress	Actividad enzimática de bacterias asociadas al sargazo del caribe mexicano	Karina Maldonado; Lorena Pedraza; Doris Rodríguez; Sylvie Le Borgne	4	Academic sector	Universidad Iberoamericana (IBERO)	Nineteen microorganisms were isolated from sargassum samples from the Mexican Caribbean. Enzymatic tests were performed on these isolates to determine their function in the degradation of sargassum.	NA	2019	NA	2019	Mexican caribbean	Potential uses	To determine the enzymatic activity of bacteria associated with sargassum collected	In this work, the behavior of microorganisms in the degradation of various sargassum polymers was observed via detecting enzymatic activity.	Maldonado, K ; Pedraza, L; Rodríguez, D; Le Borgne, S. 2019. Actividad enzimática de bacterias asociadas al sargazo del caribe mexicano. XVII Congreso Nacional de Biotecnología y Bioingeniería, León, Guanajuato.	UAM	1	1	0
480	Article or presentation at scientific meeting or congress	Los hongos comestibles, funcionales y medicinales: alternativa biotecnológica ante la problemática social, económica y ecológica del sargazo en el Caribe Mexicano	Daniel Martínez Carrera; Alfonso Larqué Saavedra; Mario Rebolledo Vieyra; Porfirio Morales; Ivan Castillo; Myrna Bonilla; Beatriz Petlacalco; Wilfrido Martínez; Gilmar Rendón; Vladimir Mitzi; Alfredo Morales; Víctor Macuil; Joan Olvera; Luis Pérez; Mercedes Sobal; María Maimone Celorio; Hugo Martínez	17	Academic sector	Colegio de Postgraduados (CP), Campus Puebla	In this work, it is proposed to use biotechnology for the production of edible, functional and medicinal mushrooms, using sargassum that accumulateson the coasts of the Mexican Caribbean.	2018	2019	1	2019	Puerto Morelos	Potential uses	To determine the usefulness and effectiveness of a substrate made from sargassum for the cultivation of edible mushrooms.	Research has shown that edible mushrooms of the Pleurotus genus can be inoculated, grow, develop and reproduce on a sargassum culture substrate.	Martínez-Carrera, D., Larqué-Saavedra, A., Vieyra, M. R., Morales, P., Castillo, I., Bonilla, M., ... & Martínez, H. 2019. Los hongos comestibles, funcionales y medicinales: alternativa biotecnológica ante la problemática social, económica y ecológica del sargazo en el Caribe Mexicano. Foro Consultivo Científico y Tecnológico, A.C. Ciudad de México, México.	CICY; UPAEP	2	2	0
490	Description of funded projects	Evaluación del sargazo (Sargassum fluitas) procedente de la costa maya de Quintana Roo como una alternativa sustentable en el área agroalimentaria	Ana Alejandra Martínez Flores; Elizabeth Argüelles Hernández; Zaida Nelly Juárez; Clara Angélica Rodríguez Mendoza	4	Academic sector	Universidad Popular Autónoma del Estado de Puebla (UPAEP)	It was proposed to evaluate the sargassum that arrives to Quintana Roo coasts through phytochemical, bromatological, herbicide and toxicological tests to propose a sustainable alternative in the agri-food area.	2018	2019	1	2019	Quintana Roo	Potential uses	To evaluate sargassum as a sustainable alternative in the agri-food area.	NA	NA	NA	0	0	0
500	eBook/Gazette/Newsletter	Obtención de un compuesto con sargazo y plástico recuperado, con aplicación potencial como material de construcción	Ricardo Herbé Cruz Estrada; Carlos Vidal Cupul Manzano; Irene Francisca Hernández Rodríguez	3	Academic sector	Centro de Investigación Científica de Yucatán (CICY)	A prototype of a construction material made was developed using sargassum and plastic.	2019	2020	1	2020	Puerto Morelos	Potential uses	To use sargassum for the production of a composite material with a matrix of recovered plastic	Pellets were obtained from the mixture of sargassum and plastic, which were molded by compression to obtain laminates. The results indicate that the obtained material has a high stiffness and good resistance to bending.	Cruz Estrada, RH; Cupul Manzano, C.V; Hernández Rodríguez, I.F. 2020. Obtención de un compuesto con sargazo y plástico recuperado, con aplicación potencial como material de construcción. En Gestion Integral de Recursos. Sociedad Mexicana de Ciencia y Tecnología Aplicada a Residuos Sólidos A.C.	NA	0	0	0
510	Description of funded projects	Proceso de producción de alginato de sodio mediante Sargassum sp (sargazo), utilizando polietilenglicoles de alta densidad	Norma Martínez; Citlali Cauich; Luis Miguel Masiá Nebot	3	Private sector	Creamos Más	Creamos Más SA DE CV is a company interested in the development of high-impact projects at a social, environmental and ecological level. This project consists on the extraction of sodium alginate, which is found in the cell wall of brown algae.	2018	To date	To date	2018	Quintana Roo	Potential uses	In the exploration of an effective and environmentally-friendy method of extracting alginate from sargassum, the use of high-density polyethylene glycols as a purification system and hydrogen peroxide as a bleaching agent, is proposed.	Product commercialization	NA	NA	0	0	0	http://www.premioslatinoamericaverde.com/proyectos/Planta_piloto_de_alginato_2018	6452718
520	Website	Manejo integral del sargazo	Arq. David Jauregui Chávez	1	Private sector	Grupo Dakatso	In Dakatso we contemplate all the opportunities to provide a sustainable treatment to Sargassum. A project was developed to obtain a substrate for dune reforestation. Also SARGACRETO is a concrete produced with 60% sargassum in its formulation.	2015	To date	To date	2015	Quintana Roo	Potential uses	To carry out and integral sargassum management developing strategies in four strategic lines: Containment, harvest, disposal, industrialization, and monitoring.	Product commercialization	NA	NA	0	0	0	https://www.dakatso.com.mx/
530	Peer-reviewed scientific article	Identificación de algas en Progreso, Yucatán para su aprovechamiento sustentable	Elsy María Rosales Uc; Gianny Melina Cancino Méndez; Chalé Herrera	3	Academic sector	Instituto Tecnológico Superior Progreso (TECNM)	This project identified algae influxes in Yucatán. The most common management practice is to burry the algae along with arriving seagrass. This practice should be re-evaluated based on the potential uses of this biomass.	NA	2018	NA	2018	Puerto de Progreso	Potential uses	To identify species of macroalgae arriving to Yucatan and to explore their potential uses.	Sargassum can be used to make sheets of paper or compost.	Rosales Uc, E.M., Cancino Méndez, G.M., y Herrera Chal. 2018. Identificación de algas en Progreso, Yucatán para su aprovechamiento sustentable. Revista del Centro de Graduados e Investigación. Instituto Tecnológico de Mérida. 33 (70): 14	NA	0	0	0
540	Thesis	Utilización del Sargassum spp. para síntesis verde de nanopartículas de platino y producción de carbón para aplicaciones en la generación de energía	David Fernando Rosas Medellín	1	Academic sector	Centro de Investigación Científica de Yucatán (CICY)	A catalyst for fuel cells based on carbon was obtained from a sargassum pyrolysis process. Platinum nanoparticles were also synthetized from an extract of sargassum. Fuel cells can convert chemical energy into electrical energy.	NA	2019	NA	2019	Playa del Carmen	Potential uses	To use sargassum as a source of doped carbon and metal nanoparticle synthesis to produce catalyst material.	Sargassum is perceived as an excellent precursor for the green synthesis of nanoparticles. A high surface area catalyst was also produced.	Rosas-Medellín, D. F. 2019. Utilización del Sargassum spp. para síntesis verde de nanopartículas de platino y producción de carbón para aplicaciones en la generación de energía. Master Thesis. Centro de Investigación Científica de Yucatán.	NA	0	0	0
550	Peer-reviewed divulgation article	Bioremediation potential of Sargassum sp. to tackle pollution in coastal ecosystems: A circular economy approach	Sara Saldarriaga Hernandez; Gustavo Hernandez Vargas; Hafiz M.N. Iqbal; Damiá Barceló; Roberto Parra Saldívar	5	Academic sector	Tecnológico de Monterrey	Different technologies have been developed for the removal and mitigation of pollutants in aquatic environments. These include bioabsorption and bioaccumulation. In this work, information is provided to highlight the potential of Sargassum sp. for the environmental decontamination of coastal ecosystems. The captured pollutants can be recovered and reintegrated into the value chain of industrial p…	NA	2020	NA	2020	NA	Potential uses	To provide a review of the use of sargassum in bioremediation of contaminated coastal systems	Sargassum exhibits great potential to be used for the bioabsorption of pollutants in coastal ecosystems.	Saldarriaga-Hernandez, S., Hernandez-Vargas, G., Iqbal, H. M., Barcelo, D., & Parra-Saldívar, R. 2020. Bioremediation potential of Sargassum sp. biomass to tackle pollution in coastal ecosystems: Circular economy approach. Science of The Total Environment, 715, 136978.	NA	0	0	0
560	Peer-reviewed divulgation article	Sargassum-based potential biosorbent to tackle pollution in aqueous ecosystems–An overview	Sara Saldarriaga Hernandez; Erik Francisco Najera Martínez; María Adriana Martínez Prado; Elda M. Melchor Martínez	4	Academic sector	Tecnológico de Monterrey	Various bioremediation approaches have been tried to effectively mitigate and remove toxic compounds, such as metal ions, from aquatic environments. This review paper highlights the potential of sargassum-based biosorbents as an alternative for the removal of toxic pollutants from aquatic environments.	NA	2020	NA	2020	NA	Potential uses	To highlight the main mechanisms of bioabsorption of contaminants by sargassum and its potential use in aquatic systems.	Sargassum has been identified as having a high bioabsorption capacity due to its high content of polysaccharides such as alginate and fucoidans. The bioremediation capacity depends on the cell wall surface functionalities and interaction with contaminants.	Saldarriaga-Hernandez, S., Nájera-Martínez, E. F., Martínez-Prado, M. A., & Melchor-Martínez, E. M. 2020. Sargassum-based potential biosorbent to tackle pollution in aqueous ecosystems–An overview. Case Studies in Chemical and Environmental Engineering, 2, 100032.	ITD	1	1	0
570	Peer-reviewed scientific article	Biological pretreatment of mexican caribbean macroalgae consortiums using Bm-2 strain (Trametes hirsuta) and its enzymatic broth to improve biomethane potential	Raúl Tapia Tussell; Julio Avila Arias; Jorge Domínguez Maldonado; David Valero; Edgar Olguin Maciel; Daisy Pérez Brito; Liliana Alzate Gaviria	7	Academic sector	Centro de Investigación Científica de Yucatán (CICY)	The biomass of macroalgae in the Mexican Caribbean represents an emerging raw material for biofuels. In this work, its biological pretreatment and energy conversion potential to biomethane were investigated.	2017	2018	1	2018	Puerto de Progreso	Potential uses	The objective of this work was to evaluate the potential for biogas production from macroalgae from the Mexican Caribbean.	The macroalgae used in this study are promising for biomethane production. Fungal pretreatment produced a 20% increase in methane yield.	Tapia-Tussell, R., Avila-Arias, J., Domínguez Maldonado, J., Valero, D., Olguin-Maciel, E., Pérez-Brito, D., & Alzate-Gaviria, L. 2018. Biological pretreatment of mexican caribbean macroalgae consortiums using Bm-2 strain (Trametes hirsuta) and its enzymatic broth to improve biomethane potential. Energies, 11(3), 494.	NA	0	0	0
580	Apps	SargaZoom: Aplicación móvil para identificar especies que conforman las arribazones de sargazo	Daniel Robledo Ramírez	1	Academic sector	Centro de Investigación y de Estudios Avanzados (CINVESTAV) Mérida, IPN	The mobile application SargaZoom helps reserches and the general public to recognize the main characteristics of the algae and seagrasses that arrive to the Mexican Caribbean.	2020	To date	To date	2020	Mexican caribbean	Communication and education	To have a useful technological tool that allow the identification of sargassum species.	Development of an app	NA	CIBNOR; Centro Geo	2	2	0	https://play.google.com/store/apps/details?id=com.fico.sarga_zoom&hl=en&gl=US
590	Website	Micrositio de CONACYT sobre el sargazo	Edith Calixto Pérez	1	Government sector	Consejo Nacional de Ciencia y Tecnología (CONACYT)	Conacyt portal with relevant information about the sargassum phenomenon.	2019	To date	To date	2019	NA	Communication and education	To be an informative government tool on the sargassum phenomenon in Mexico	NA	NA	NA	0	0	0	https://www.conacyt.gob.mx/sargazo/
600	Website	Sargassum information hub	Emily Smail	1	Dependencies abroad	National Oceanic and Atmospheric Administration (NOAA)	The Sargassum Information Hub is a project to support an integrated approach to monitoring and forecasting concentrations of sargassum as well as to facilitate the exchange of data from countries to promote best practices for the management and use of sargassum.	2020	To date	To date	2021	NA	Communication and education	To develop a sargassum information hub to support collaborations, facilitate access to information, and avoid duplication of efforts.	NA	NA	NA	0	0	0	https://sargassumhub.org/
610	Description of funded projects	Technical evaluation of specialized equipment for the containment, harvest and/or processing of pelagic algae in shallow seas	Tomás Salgado Jiménez	1	Academic sector	Centro de Ingeniería y Desarrollo Industrial (CIDESI)	This project aims to generate an exhaustive and updated list of suppliers and equipment for the physical containment, harvest, primary transformation and disposal of sargassum. It is also intended to technically and economically evaluate the equipment available in the world under technical criteria, efficiency, ecological footprint, waste, energy source, etc. thus, prioritizing the ten most effic…	2020	To date	To date	2021	NA	Containment, harvest and disposal	To carry out an exhaustive search of the different techniques and technologies of commercial equipment for physical containment, harvest and primary processing of macroalgae.	NA	NA	SEMAR (Government); CONACYT (Government)	2	2	0		3492000
620	Description of funded projects	Technical studies of characterization of sargassum oriented to the generation of regulations associated with risks and potential productive use	Rosa María Leal Bautista	1	Academic sector	Centro de Investigación Científica de Yucatán (CICY)	This project aims to: 1) Generate and validate analytical methods associated with the generation of standards and regulations regarding sargassum. 2) Determine the impact of sargassum with different levels of deterioration in coastal areas. 3) Determine the bacterial parameters and presence of viruses associated with sargassum that could affect human health. 4) Determine the composition of fresh …	2020	To date	To date	2021	Cancún; Puerto Morelos	Regulations	To develop analytical methods for the qualitative and quantitative characterization of the effects of sargassum in marine environments, with respect to its impact on human health, biodiversity, aquifers, emissions into the atmosphere, and use processes.	NA	NA	SEMAR (Government); CONACYT (Government); CIMAV; UACAM; Universidad Anahuac Mayab	5	5	0		9412329
630	Media news (on projects)	Vehículo eléctrico sustentable para limpieza del sargazo	José Antonio Garfias González; Alan Fernando Ruiz López	2	Academic sector	Instituto Politécnico Nacional (IPN)	Students develop a sustainable electronic vehicle to collect sargassum from the beaches of the Mexican Caribbean. Due to its design, it will prevent soil erosion. The technological innovation will have the capacity to clean 60 linear kilometers of beach and collect up to four tons of macroalgae in three hours.	2019	To date	To date	2020	NA	Containment, harvest and disposal	To develop a sustainable electric vehicle for sargassum collection at beach.	NA	NA	NA	0	0	0	https://www.ipn.mx/imageninstitucional/comunicados/ver-comunicado.html?y=2019&n=192
640	Website	Contención y redireccionamiento de sargazos costa afuera	César Humberto Isassi Martínez	1	Private sector	Goimar	The Goimar company works on the containment and redirection of sargassum with ecological barriers, placed at a distance of half a kilometer from the Mexican Caribbean coast	2018	To date	To date	2018	Mexican caribbean	Containment, harvest and disposal	Installation of barriers for the containment and deflection of sargassum.	Barrier marketing and production	NA	SEMAR (Government); SEMA (Government)	2	2	0	https://goimsa.com/inicio
650	Website	Barreras antisargazo	Arq. David Jauregui Chávez	1	Private sector	Grupo Dakatso	This company design and manufactures floating containment barrier systems, in addition to all the equipment and machinery necessary for extraction and transport.	2015	To date	To date	2015	Puerto Morelos; Xcalak; Mahahual; Tulum	Containment, harvest and disposal	To carry out an integral management of sargassum.	Barrier marketing and production	NA	NA	0	0	0	https://www.dakatso.com.mx/
660	Website	Direccionamiento, contención y extracción del sargazo	Alejandro Bravo Quezada	1	Private sector	Ocean Solutions México	Ocean Solutions Mexico implements strategies for directing, containing and extracting sargassum that reaches the coast. It also carries out daily monitoring of ocean parameters.	2015	To date	To date	2015	Quintana Roo	Containment, harvest and disposal	To accomplish the necessary research for the installation of barriers as well as their design, installation and monitoring.	Data collection and analysis services. Barrier marketing and production	NA	NA	0	0	0	https://oceansolutionsmexico.com/
670	Media news (on projects)	Protocolo Puerto Morelos: Respuesta a la contingencia	Roberto Cintrón Gómez	1	Private sector	Asociación de Hoteles de Cancún y Puerto Morelos	The Association of Hotels of Cancun and Puerto Morelos and the municipal government of the entity, presented the Protocol of Puerto Morelos, a manual that describes an strategy to reduce the negative effects of sargassum on the entire state of Quintana Roo.	2018	To date	To date	2018	Quintana Roo	Containment, harvest and disposal	To harvest sargassum from the sea before it arrives to the beaches.	NA	NA	ICML; FONATUR (Government); SEMA (Government); SEMARNAT (Government)	4	4	0	https://www.lajornadamaya.mx/quintana-roo/15117/Protocolo-Puerto-Morelos--respuesta-a-la-contingencia#:~:text=El%20protocolo%20es%20una%20iniciativa,las%20costas%20del%20Caribe%20mexicano.
680	Media news (on projects)	Recolección, contención, redirección y destino final del sargazo	Édgar Alejandro De Luna Prieto	1	Private sector	Manufacturas Industriales DP	In order to reduce the negative effects of sargassum arrival, a comprehensive strategy for the containment, harvest, redirection and final destination of sargassum is presented. This company develops barriers, vessels, trasportation systems, etc to address the sargassum problem.	2020	To date	To date	2021	Playa del Carmen	Containment, harvest and disposal	To reduce the negative impacts of sargassum collection on the beach	Barrier, vessels and other technological developments are presented.	NA	ZOFEMAT (Government)	1	1	0	https://laverdadnoticias.com/quintanaroo/Manufacturas-Industriales-DP-SA-de-CV-atendera-sargazo-en-Playa-del-Carmen-20200601-0282.html		3
690	Thesis	Proyecto de recolección de sargazo en las costas del caribe mexicano. Diseño y evaluación	Mayra Murillo García	1	Academic sector	Universidad Nacional Autónoma de México (UNAM)	Sargassum harvest processes must be efficient, friendly to the ecosystem and economically feasible. This project proposes a process with these characteristics	NA	2017	NA	2017	Mexican caribbean	Containment, harvest and disposal	To propose a process for sargassum harvest at the sea	A cost-benefit analysis was presented.	Murillo-García, M. 2017. Proyecto de recolección de sargazo en las costas del caribe mexicano. Diseño y evaluación. Master Thesis. UNAM, México.	NA	0	0	0
700	Website	Extracción de sargazo	José de Jesús Dueñas García	1	Private sector	Preyco	A new technology is developed for the extraction of sargassum. Huge mechanical bands direct the sargassum out of the water and deposit it in containers for final disposal. With this machinery it is possible to extract more than 100 kilograms per minute.	2018	2019	1	2019	Quintana Roo	Containment, harvest and disposal	Develop a process for extracting sargassum at sea	Marketing and production of extraction equipment	NA	NA	0	0	0	https://www.preyco.com.mx/sustentable.html
710	Website	Gestión Integral del Sargazo en las playas del Caribe	Arq. David Jauregui Chávez	1	Private sector	Sargazo Solutions	Sargazo Solutions is a Mexican company specialized in the comprehensive management of sargassum on the Caribbean beaches. It design, manufacture, install and operate equipment for the management of this seaweed.	2018	To date	To date	2018	Quintana Roo	Containment, harvest and disposal	Research and development of prototypes for sargassum management.	Marketing and production of containment and harvest equipment	NA	NA	0	0	0	http://sargazosolutions.com/
720	Website	DESMI Sea Turtle Project – Sargassum	Rolando Chávez Peñaherrera	1	Private sector	DESMI	The DESMI Sea Turtle – Sargassum Project intends to find an ecological and cost-effective solution to sargassum atypical influxes to beaches.	2015	To date	To date	2015	Mexican caribbean	Containment, harvest and disposal	To test different alternatives of sargassum barriers and removal units.	Barrier marketing and development	NA	NA	0	0	0	https://www.desmi.com/es/
730	Media news (on projects)	Horno de secado para sargazo	Omar Vázquez Sánchez	1	Private sector	BlueGreen	Blue Green company dries sargassum in a 60 square meter oven that uses solar energy to function	2015	To date	To date	2015	Quintana Roo	Potential uses	To dehydrate sargassum and convert it into cattle feed, fertilizer and other products.	Technology development	NA	NA	0	0	0	https://sipse.com/novedades/secan-el-sargazo-para-convertirlo-en-alimento-para-ganado-164735.html		1
740	Website	Limpieza de sargazo	Héctor González Fernández	1	Private sector	The Ocean Cleaner	The Ocean Cleaner uses the following technologies for sargassum management: the Sargaboat TM, which harvests the sargassum in water, and the Sargatrailer TM, which removes sargassum from the sea in reusable bags that have a capacity of one cubic meter.	2019	To date	To date	2019	Quintana Roo	Containment, harvest and disposal	Create a comprehensive solution to stop the arrival of sargassum to beaches.	Barrier and vessels marketing and development	NA	NA	0	0	0	https://theoceancleaner.com/
750	Website	Equipos para el manejo y recolección de lirio y sargazo	Jorge Gaona	1	Private sector	Tecno Productos GAB	A company focused on the design of specialized machinery for the control of sargassum.	2015	To date	To date	2015	Quintana Roo	Containment, harvest and disposal	To develop a "sargacera", conveyor belts, containment barriers, vehicles with trailers for transporting sargassum.	Marketing and development of sargassum cleaning equipment	NA	NA	0	0	0	https://www.tecnogab.com.mx/lirio-sargazo
760	Website	Productos sustentables a base de Sargazo	Victoria Morfín	1	Private sector	Sargánico	Mexican company that creates sustainable products (notebooks, agendas, folders, cup holders, menu holders and business cards, among others) made with Sargassum.	2019	To date	To date	2019	Quintana Roo	Potential uses	To develop sustainable products based on sargassum. To replace the use of paper for a more sustainable alternative	Product development and commercialization	NA	NA	0	0	0	https://sarganico.mx/inicio/
770	Website	Biodiesel a base de Sargazo	María Lourdes Cauich May	1	Private sector	Bioremar	A group of students presented a project to obtain biodiesel from sargassum. The prototype product is called Bioremar and works as a replacement for diesel fuel of fossil origin. In addition to this biodiesel they also developed cosmetic products.	2017	To date	To date	2017	Quintana Roo	Potential uses	To develop biodiesel and other products using sargassum	Product development	NA	NA	0	0	0	https://www.facebook.com/Biodiesel-a-Base-de-Sargazo-Bioremar-484807585324968/
780	Website	Sargazo aglomerado	Saúl Duarte Méndez	1	Private sector	Diseño y Decorativos del Caribe Maya	This company uses sargassum for the manufacture of furniture.	2018	To date	To date	2018	Puerto Morelos	Potential uses	To utilize sargassum as a raw material in the development of a conglomerate that can be use in the furniture manufacturing industry.	Product development and commercialization	NA	NA	0	0	0	http://www.mayadiseno.wixsite.com/mexico		1
790	Article or presentation at scientific meeting or congress	Manejo de residuos agroindustriales	María Myrna Solís Oba; Rigoberto Castro Rivera	2	Academic sector	Centro de Investigación en Biotecnología Aplicada (CIBA) IPN	An evaluation of organic fertilizers made with different residues, including sargassum, was conducted.	2020	To date	To date	2020	NA	Potential uses	NA	NA	Solís-Oba, M y Castro-Rivera, R. 2020. Manejo de residuos agroindustriales. XII Encuentro de Investigadores de la Red de Biotecnología. Virtual meeting.	NA	0	0	0
800	Technical report	Sargassum uses guide: A resource for Caribbean researchers, entrepreneurs and policy makers	Anne Desrochers; Shelly Ann Cox, Hazel A. Oxenford; Brigitta van Tussenbroek	3	Dependencies abroad	Centre for Resource Management and Environmental Studies (CERMES) University of the West Indies, Cave Hill Campus	This guide is presented as a resource for researchers, entrepreneurs, and policymakers by providing an overview of the wide range of current uses of sargassum in the Caribbean, the lessons learned, and the current challenges. In addition, it provides a directory of Caribbean researchers and entrepreneurs working on the development of sargassum uses to assist in networking. Finally, this guide hel…	NA	2020	NA	2020	NA	International cooperation	To document current uses of sargassum in the Caribbean and share progress and lessons learned. To provide a directory of researchers, innovators and companies that are currently working with sargassum to develop economically viable products and solutions.	A compendium of uses of sargassum in different areas of the Caribbean.	Desrochers, A., S-A. Cox, H.A. Oxenford and B. van Tussenbroek. 2020. Sargassum uses guide: a resource for Caribbean researchers, entrepreneurs and policy makers. Report prepared for the Climate Change Adaptation in the Eastern Caribbean Fisheries Sector (CC4FISH) Project of the Food and Agriculture Organization (FAO) and the Global Environment Facility (GEF). Centre for Resource Management and E…	FAO (Dependency abroad); GEF (Dependency abroad); ICML	3	1	2
810	Media news (on projects)	Research, development and innovation to face the sargassum phenomenon in the Caribbean	Valerie Barbosa Solomieu	1	Dependencies abroad	Agencia de Investigación de Francia (ANR)	Mexico joins the initiative of the ANR to launch a call for "Research, development and innovation" on the sargassum phenomenon in the Caribbean.	2020	To date	To date	2020	NA	International cooperation	To develop multinational strategies to provide pragmatic solutions to the sargassum problem and to develop new knowledge about this phenomenon.	Multinational call	NA	CONACYT (Government); CONABIO (Government)	2	2	0	https://anr.fr/en/call-for-proposals-details/call/joint-call-research-development-and-innovation-sargassums/
820	Media news (on projects)	SARG'COOP project	Valerie Barbosa Solomieu	1	Dependencies abroad	Caribbean Cooperation Program against Sargassum (SARG'COOP)	The 2019 International Sargassum Conference was the framework to launch the INTERREG SARG'COOP funded by the European Union. This multinational consortium is expected to create an observation, monitoring and warning system for sargassum and develop a network of professionals to address the problem. Mexico entered this initiative at the end of 2020.	2020	To date	To date	2020	NA	International cooperation	The objective of this program is to strengthen cooperation between the states and territories of the Caribbean to significantly improve the resilience of the sargassum affected areas.	NA	NA	CONACYT (Government); CONABIO (Government)	2	2	0	https://pressroom.oecs.org/international-conference-on-sargassum-to-launch-an-ambitious-cooperation-program-in-the-caribbean
830	Website	Sargassum Satellite Monitoring System (SASAMS)	Betsabé de la Barreda; Hansel Caballero Aragón; Sergio Cerdeira Estrada; Pablo López Ramírez; Adolfo V. Magaldi Hermosillo; Rainer Andreas Ressl; Oscar Gerardo Sánchez Siordia	7	Dependencies abroad	University of Nottingham	SASAMS is a project funded by the UK space agency, led by the University of Nottingham in the UK. SASAMS is planned to be a near real-time service to monitor the arrival of pelagic sargassum and its accumulation on the coastline.	2020	To date	To date	2020	Mexican caribbean	International cooperation	To develop a cost-effective near real-time sargassum monitoring system for the Mexican Caribbean coast	Completion of the first stage of the project where needs for this system were identify	NA	CONACYT (Government); CONABIO (Government); Centro de Ciencias de la Atmósfera UNAM; Centro Geo	4	4	0	http://www.sasams.org/site.html
840	Peer-reviewed divulgation article	México ante el sargazo	Dalila Aldana Aranda (editora); Beatriz Paredes Rangel; J. Adán Caballero Vázquez, Gilberto Acosta González; Cecilia Hernández Zepeda; Laura Carrillo; Julio Sheinbaum Pardo; Rosa Elisa Rodríguez Martínez; Brigitta Ine van Tussenbroek; Héctor A. Hernández Arana; Laura M. Hernández Terrones; Gisela Maldonado Saldaña; Rosa M. Leal Bautista, Raúl Tapia Tussell; Liliana Alzate Gaviria; Iris Aurora Nav…	17	Academic sector	Revista de la Academia Mexicana de Ciencias	The Mexican Academy of Sciences magazine (2020) in its volume 71 number 4, presents an overview of the sargassum phenomenon on the Mexican coasts, including a summary of different research efforts ranging from monitoring, explanations of its origin, impacts on ecosystems, to explotation and use.	NA	2020	NA	2020	NA	Communication and education	To provide an overview of the sargassum phenomenon on the Mexican coasts	A compendium of knowledge about sargassum in Mexico	Aldana-Aranda, D (Ed). 2020. México ante el sargazo. Revista de la Academia Mexicana de Ciencias, 71(4): 1-100	NA	0	0	0
850	Peer-reviewed scientific article	A rapid spread of the stony coral tissue loss disease outbreak in the Mexican Caribbean	Lorenzo Alvarez-Filip; Nuria Estrada Saldívar; Esmeralda Pérez Cervantes; Ana L. Molina Hernández; Francisco J. González Barrios	5	Academic sector	Instituto de Ciencias del Mar y Limnología (ICML), UNAM	Coral reefs in the Caribbean have experienced an unprecedented decline in recent decades due to climate change, anthropogenic stress and infectious diseases. Since 2014, a new highly lethal disease, called stony coral tissue loss disease (SCTLD), has affected many species and has already spread throughout the region. There is no evidence of such a high prevalence of coral disease anywhere in the …	2018	2019	1	2019	Mexican caribbean	Socioeconomic and environmental impacts	To study the impact of SCTLD on coral communities in the Mexican Caribbean by quantifying the prevalence of the disease and describing how this disease has modified the condition and composition of corals	Eutrophication has been identified as one of the main factors in the deterioration of reefs in the region. This phenomenon is associated with sargassum nfluxes that accumulates on the coasts and decomposes quickly. More research is needed to fully understand the relationship between water quality in the Mexican Caribbean and the susceptibility of coral reefs to disease.	Alvarez-Filip L, Estrada-Saldívar N, Pérez-Cervantes E, Molina-Hernández A, González-Barrios FJ. 2019. A rapid spread of the stony coral tissue loss disease outbreak in the Mexican Caribbean. PeerJ 7:e8069 https://doi.org/10.7717/peerj.8069	Parque Nacional Arrecifes de Cozumel (Government); Parque Nacional Arrecife de Puerto Morelos (Government); CONANP (Government)	3	3	0
860	Peer-reviewed scientific article	Leachate effects of pelagic Sargassum spp. on larval swimming behavior of the coral Acropora palmata	Francisco Antonio Martínez; Yann Henaut; Alejandro Vega Zepeda; Ana I. Cerón Flores; Rodolfo Raigoza Figueras; Neidy P. Cetz Navarro; Julio Espinoza Avalos	7	Academic sector	El Colegio de la Frontera Sur (ECOSUR)	An emerging disturbance for Caribbean reefs is the massive arrival of pelagic sargassum that deteriorates water quality due to the production of leachates. In a controlled experiment, it was possible to document that sargassum leachates modify the swimming behavior of coral larvae, which can reduce larval dispersal and genetic diversity.	2019	2020	1	2020	Punta Venado	Socioeconomic and environmental impacts	To determine if the leachates of S. fuitans and S. natans modify the swimming behavior of coral larvae under laboratory conditions.	This is the first study to demonstrate the negative effects of sargassum leachates on the swimming behavior of coral larvae. The arrival of sargassum to the Caribbean could be a great threat to coral reproduction.	Antonio-Martínez, F., Henaut, Y., Vega-Zepeda, A., Cerón-Flores, A. I., Raigoza-Figueras, R., Cetz-Navarro, N. P., & Espinoza-Avalos, J. 2020. Leachate effects of pelagic Sargassum spp. on larval swimming behavior of the coral Acropora palmata. Scientific reports, 10(1), 1-13.	Grupo Xcaret (Private sector); CICESE; UNAM	3	3	0
870	Technical report	El riesgo del sargazo para la economía y turismo de Quintana Roo y México	Luis Antonio Espinosa; Juan José Li Ng	2	Private sector	BBVA Research	The present study analyzes economic variables to analyze the effects of sargassum influxes in the tourist activity of Mexico in 2019. The results do not seem to support the hypothesis of a considerable impact.	NA	2020	NA	2020	Mexican caribbean	Socioeconomic and environmental impacts	To understand if the massive sargassum arrival during 2018-2019 had true effects on the economy and the tourism sector of the state of Quintana Roo and Mexico.	From January to September 2019, there was a drop from -2.2% to -5.0% in hotel occupancy in Quintana Roo; but national (+2.4%) and international (+0.1%) air passengers and cruise visitors (+7.8%) increased, and unemployment, underemployment and informality indicators were very similar to the previous year.	Antonio-Espinosa, L. y Li-Ng, J.J. 2020. Documento de trabajo: El riesgo del sargazo para la economía y turismo de Quintana Roo y México. BBVA Research, 20:02. 34 pp.	NA	0	0	0
880	Peer-reviewed scientific article	Sargassum blooms in the Caribbean alter the trophic structure of the sea urchin Diadema antillarum	Nancy Cabanillas-Terán; Héctor A. Hernández Arana; Miguel Ángel Ruiz Zárate; Alejandro Vega Zepeda; Alberto Sanchez Gonzalez	5	Academic sector	El Colegio de la Frontera Sur (ECOSUR)	This study evaluates the impact of sargassum arrivals on the trophic dynamics of the sea urchin Diadema antillarum, a key herbivore on many Caribbean reefs. The effects of the leachates generated by the decomposition of the sargassum led to hypoxic conditions in the reefs and reduced the taxonomic diversity of the macroalgae which are the primary food source for D. antillarum.	2015	2018	3	2018	Mahahual; Xahuayxol; Xcalak	Socioeconomic and environmental impacts	To determine variations in the relative proportions of carbon and nitrogen of assimilated algal resources and the niche breadth of D. antillarum under massive influx of Sargassum spp. vs. no influx of Sargassum at back reefs	Sargassum influxes caused changes in the trophic characteristics of D. antillarum with a negative impact due to hypoxic conditions.	Cabanillas-Terán N, Hernández-Arana HA, Ruiz-Zárate MÁ, Vega-Zepeda A, Sanchez-Gonzalez A. 2019. Sargassum blooms in the Caribbean alter the trophic structure of the sea urchin Diadema antillarum. PeerJ 7:e7589. http://doi.org/10.7717/peerj.7589	CICIMAR; CONANP (Government)	2	2	0
890	Peer-reviewed scientific article	Seaweed Invasion! Temporal Changes in Beach Conditions Lead to Increasing Cenote Usage and Contamination in the Riviera Maya	Diego Armando Casas-Beltrán; Courtney Maloof Gallaher; Emely Hernandez Yac; Karelys Febles Moreno; Kenneth Voglesonger; Rosa María Leal Bautista; Melissa Lenczewski	7	Academic sector	Centro de Investigación Científica de Yucatán (CICY)	The massive arrival of sargassum discourages beach tourism, which could displace tourism inland towards other activities such as swimming in cenotes. This study analyzes combined data from surveys of visitors to the region, interviews with tourists and tour operators, thematic analysis of newspaper articles, laws and policies, and an analysis of water samples from a cenote to understand the indir…	2019	2020	1	2020	Riviera Maya	Socioeconomic and environmental impacts	To understand how massive sargassum arrivals have impacted tourist perceptions and behaviors in the Riviera Maya region, including an increase in cenotes tourism.	A greater promotion of cenote tourism was identified in response to the problem of sargassum. The data from the interviews confirmed that tourists choose to visit cenotes instead of beaches at times of massive arrivals. Water samples from a tourist cenote in 2019 indicated an increase in contamination in relation to previous years.	Casas-Beltrán, D. A., Gallaher, C. M., Hernandez Yac, E., Febles Moreno, K., Voglesonger, K., Leal-Bautista, R. M., & Lenczewski, M. 2020. Seaweed Invasion! Temporal Changes in Beach Conditions Lead to Increasing Cenote Usage and Contamination in the Riviera Maya. Sustainability, 12(6), 2474.	NIU (Dependency abroad); University of California Merced (Dependency abroad); PUCPR (Dependency abroad)	3	0	3
900	Article or presentation at scientific meeting or congress	Sargazo en el caribe mexicano: Aspectos hidrogeológicos	Ing. Rubén Chávez Guillén	1	Government sector	Comisión Nacional del Agua (CONAGUA)	Specific actions are presented to respond to the sargassum phenomenon: 1) Establishment of local and regional protection zones for cenotes and groundwater reservoirs for human consumption 2) General guidelines for the location, construction, design, equipment and operation of sanitary landfills and septic tanks 3) Instrumentation and monitoring of groundwater quality 4) Declaration of reserve zon…	NA	2019	NA	2019	Quintana Roo	Socioeconomic and environmental impacts	NA	NA	Chávez-Guillén, R. 2019. Sargazo en el caribe mexicano: Aspectos hidrogeológicos. Conferencia "Diálogo con Ingenieros", Ciudad de México, 2019.	Asociación geohidrológica mexicana (Civil society)	1	1	0
910	eBook/Gazette/Newsletter	El sargazo: Amenaza para el acuífero de Quintan Roo	Ing. Rubén Chávez Guillén	1	Government sector	Comisión Nacional del Agua (CONAGUA)	A brief summary of the characteristics of sargassum, the hypotheses about its origin and the harmful effects it causes, is presented. This investigation warns about the damage that the inadequate elimination of sargassum can generate in the aquifer.	NA	2019	NA	2019	Quintana Roo	Socioeconomic and environmental impacts	To present an overview of sargassum and its effects on the aquifers of the Yucután Peninsula and Quintana Roo	It is imperative to undertake actions aimed at preserving the quality of groundwater of a hydrological system such as that of Quintana Roo. It is recommended to carefully select the sites for a safe disposal of sargassum and to define the structural characteristics of these sites. It is also necessesary to establish a water quality monitoring network.	Chávez-Guillén, R. 2019. El sargazo: amenaza para el acuífero de Quintan Roo. IC Ingeniería Civil, 601: 20-24	NA	0	0	0
920	Thesis	Pesquería de la raya pinta Aetobatus narinari en el sureste del Golfo de México: tasas de captura y estructura poblacional.	Elizabeth Cuevas Zimbrón	1	Academic sector	El Colegio de la Frontera Sur (ECOSUR)	This study shows the environmental and social factors that influence the catch rates and population structure of the skate fishery in the southeastern Gulf of Mexico.	2010	2010	1	2010	Campeche	Socioeconomic and environmental impacts	To characterize the A. narinari skate fishery in the State of Campeche	The skate fishing operations are influenced by the amount of pelagic sargassum. Low catches were associated with the presence of sargassum mainly because this macroalgae gets entangled in the nets and disrupts a regular fishing activity.	Cuevas-Zimbrón, E. 2010. Pesquería de la raya pinta Aetobatus narinari en el sureste del Golfo de México: tasas de captura y estructura poblacional. Master Thesis. El Colegio de la Frontera Sur, Campeche.	NA	0	0	0	Sargassum spp are not identified
930	Peer-reviewed divulgation article	Valorization of pelagic sargassum biomass into sustainable applications: Current trends and challenges	Fernando Amador Castro; Tomas García Cayuela; Hal S. Alper; Veronica Rodriguez-Martinez; Danay Carrillo Nieves	5	Academic sector	Tecnológico de Monterrey	Harvest of sargassum could be an economic opportunity. Despite the various potential applications for these algae, there is still no process undertaken at a large scale. This review presents the potential uses, identifying the limitations that must be evaluated to effectively value this bio-source.	NA	2021	NA	2021	NA	Potential uses	To present an overview of sargassum, its applications and potential uses, and the limitations regarding its harvest	It is concluded that a biorefinery approach must be developed to effectively valorize the sargassum biomass.	Amador-Castro, F., García-Cayuela, T., Alper, H. S., Rodriguez-Martinez, V., & Carrillo-Nieves, D. (2021). Valorization of pelagic sargassum biomass into sustainable applications: Current trends and challenges. Journal of Environmental Management, 283, 112013.	University of Texas at Austin (Dependency abroad)	1	0	1
940	Description of funded projects	Efecto de las macroalgas de tapete en etapas tempranas del coral masivo Orbicella annularis en el Caribe Mexicano	Miguel Angel Ruíz Zárate; Julio Espinoza Avalos; Roberto Luis Herrera Pavón; Alejandro Vega Zepeda	4	Academic sector	El Colegio de la Frontera Sur (ECOSUR)	The possible effect of sargassum arrivals in three early stages of coral development, fertilization, larval period and recruitment are addressed.	2016	2020	4	2020	Mexican caribbean	Socioeconomic and environmental impacts	To undertand the possible deleterious effects that sargassum has on the biology and ecology of reef-building coral species in the Mexican Caribbean	Sargassum leachates affected the behavior and mobility of larvae, slowing them down and increasing spiral swimming behavior. Sargassum can also have a negative effect on the survival of recruits.	NA	NA	0	0	0		1500000
950	Media news (on projects)	Daño de corales y muerte de extensas zonas arrecifales por recale masivo de sargazo	Héctor Hernández Arana	1	Academic sector	El Colegio de la Frontera Sur (ECOSUR)	The decomposition of sargassum along the Costa Maya has caused the loss of beach healthy areas, but also the death of reefs with both soft and hard corals	NA	2019	NA	2019	Mahahual	Socioeconomic and environmental impacts	NA	NA	NA	NA	0	0	0	https://noticaribe.com.mx/2019/07/29/advierten-dano-de-corales-y-muerte-de-extensas-zonas-arrecifales-por-recale-masivo-de-sargazo/
960	Media news (on projects)	Carencia de evidencia científica para atribuir muerte de quelonios al sargazo	Gisela Maldonado; Roberto Luis Herrera Pavón	2	Civil society	Comité Estatal Tortugas Marinas Quintana Roo	There is no evidence that demonstrates a direct relationship between the death of turtles due to sargassum on the beaches of the Mexican Caribbean. However, it is likely that there will be an affectation in the future if the arrivals continue to increase.	NA	2019	NA	2019	Quintana Roo	Socioeconomic and environmental impacts	NA	NA	NA	NA	0	0	0	https://www.eluniversal.com.mx/estados/muerte-de-tortugas-marinas-en-q-roo-no-puede-atribuirse-al-sargazo-especialistas
970	Article or presentation at scientific meeting or congress	El sargazo pelágico modifica los grupos morfofuncionales algales de las comunidades bentónicas del sur de Quintana Roo	Pérez Posada, I; Cabanillas Terán, N; Martínez Juárez, L. F; Yanez Montalvo, A	4	Academic sector	El Colegio de la Frontera Sur (ECOSUR)	Coral cover and algal morphofunctional groups help to evaluate the changes that coral reefs experience in different states of degradation, and how they are modified by certain disturbances such as the massive influx of pelagic sargassum. In this work we evaluated whether the massive abundances of pelagic sargassum modify the structure and composition of algal morphofunctional groups and coral cov…	2018	2019	1	2019	Mahahual; Xahuayxol; Xcalak	Socioeconomic and environmental impacts	To evaluate the effect of pelagic sargassum on the structure and composition of algal morphofunctional groups and coral cover in the reefs of Quintana roo	Mahahual and Xahuayxol exhibited the most conspicuous changes in the decrease of live coral tissue coverage compared to that recorded in 2017 (before a massive influx). There were significant variations in algal structure and composition.	Pérez-Posada, I., Cabanillas-Terán, N., Martínez-Juárez, L. F., Yanez-Montalvo, A. F.2019. El sargazo pelágico modifica los grupos morfofuncionales algales de las comunidades bentónicas del sur de Quintana Roo. X Congreso Mexicano de Arrecifes coralinos. Manzanillo, Colima.	NA	0	0	0
980	Thesis	Planificación, sustentabilidad e impacto de las actividades turísticas recreativas del pasajero de cruceros: estudio de caso Mahahual (Quintana Roo, México)	Maria Angélica González Vera	1	Academic sector	Universitat Rovira i Virgili	Cruise tourism has evolved over time, becoming a very important tourism subsector in the global economy. It is of great interest to know the profile of the cruise passenger who visits Mahahual, as well as the type of recreational tourist activities that they carry out and where they are carried out (land or sea).	2017	2019	2	2019	Mahahual	Socioeconomic and environmental impacts	To determine the environmental impact caused as a result of recreational tourism activities carried out by cruise passengers and evaluate the sustainability of the Mahahual destination.	There is no evidence of a sustainable cruise tourism based on the sustainable tourism model that is mentioned in the development planning instruments, the current environmental and tourism regulations of Mahahual. As for sargassum, cruise passengers consider its presence on the beaches and in the sea to choose whether to do recreational tourism activities in the marine environment, or even to get…	González Vera, M.A. 2019. Planificación, sustentabilidad e impacto de las actividades turísticas recreativas del pasajero de cruceros: estudio de caso Mahahual (Quintana Roo, México). Master Thesis. Universitat Rovira i Virgili. Terragona, España.	UQROO	1	1	0
990	Thesis	Indicadores de estrés oxidativo de la población de tortuga blanca (Chelonia mydas) que habita en el Caribe Mexicano.	Nadia Luisa Islas Madrid	1	Academic sector	Centro de Investigaciones Biológicas del Noroeste S.C (CIBNOR)	The habitat degradation of the white turtle has been suggested as one of the factors associated with the incidence of fibropapillomatosis in this species.	2015	2020	5	2020	Xcalak; Punta Arenas; Akumal; Punta Herrero	Socioeconomic and environmental impacts	To quantify and characterize, in relation to different biotic and abiotic factors, various indicators of oxidative stress in live-captured turtles in different areas of Quintana Roo	The greatest oxidative damage in turtles was observed in sites associated with a greater tourist impact. Greater enzymatic activity was also associated with the arrival of massive amounts of sargassum.	Islas Madrid, N. L. 2020. Indicadores de estrés oxidativo de la población de tortuga blanca (Chelonia mydas) que habita en el caribe mexicano. Master Thesis. Centro de Investigaciones Biológicas del Noroeste SC, Baja California Sur.	UASLP; ECOSUR; Grupo Xcaret (Private sector); Centro Ecológico Akumal (Civil society)	4	4	0
1000	Peer-reviewed scientific article	Temporal trends of organic carbon accumulation in seagrass meadows from the northern Mexican Caribbean	P.G. López Mendoza; A.C. Ruiz Fernández; J.A. Sanchez Cabeza; B.I. van Tussenbroek; T. Cuellar Martinez; L.H. Pérez Bernal	6	Academic sector	Instituto de Ciencias del Mar y Limnología (ICML), UNAM	Carbon sequestration by seagrasses mitigates atmospheric CO2 levels. Seagrasses retain organic carbon in sediments for long periods of time. Five sediment cores collected from seagrass beds in the northern Cancun-Riviera Maya Caribbean tourism corridor were used to establish temporal trends of organic carbon content over the last 100 years.	2016	2020	4	2020	Mexican caribbean	Socioeconomic and environmental impacts	To establish an association between organic carbon accumulation in seagrasses and an increase of tourism and urban development.	Organic carbon increased gradually during the last decades, associated with an increasing accumulation of sediments, possibly caused by erosion promoted by agricultural and forestry activities and, in recent years, by a rapid increase in urban development. Possible associations of high organic carbon content with sargassum landings are also established.	López-Mendoza, P. G., Ruiz-Fernández, A. C., Sanchez-Cabeza, J. A., van Tussenbroek, B. I., Cuellar-Martinez, T., & Pérez-Bernal, L. H. 2020. Temporal trends of organic carbon accumulation in seagrass meadows from the northern Mexican Caribbean. CATENA, 194, 104645.	IMARPE (Dependency abroad)	1	0	1
1010	Thesis	Análisis de los efectos del enriquecimiento de nutrientes continentales en la vegetación acuática sumergida de la costa norte de Quintana Roo, México	Paloma Zaría López Peña	1	Academic sector	Centro de Investigación Científica de Yucatán (CICY)	The concentration of nutrients that flows to the coastal ecosystem increases with greater anthropogenic activity, which can be reflected in the increase of the proportion of P and N in the water column and in the increase of the elemental contents and δ15N isotopic values ​​in the seagrasses.	2015	2016	1	2016	Cabo Catoche; Laguna de Chacmochuch; Cancún; Puerto Morelos	Socioeconomic and environmental impacts	To identify symptoms of coastal eutrophication by comparing an urbanized region against a non-urbanized one in the north coast of the state of Quintana Roo	No significant differences were found in nutrient concentrations between the urbanized (Center) and non-urbanized (North) regions of Quintana Roo. However, δ15N values ​​were higher in the North region compared to the Central region, suggesting different nutrient sources at each site. The contribution of nutrients by a sargassum influx may have strongly influenced the dynamics of nitrogen content…	López-Peña, P. Z. Análisis de los efectos del enriquecimiento de nutrientes continentales en la vegetación acuática sumergida de la costa norte de Quintana Roo, México. Master Thesis. Centro de Investigación Científica de Yucatán, A. C. Mérida, Yucatán.	NA	0	0	0
1020	Media news (on projects)	Menor ocupación hotelera en México por sargazo	Roberto Cintrón Gómez	1	Private sector	Asociación de Hoteles de Cancún y Puerto Morelos	During the first five months of 2019, the main destinations in Quintana Roo registered a drop of between 2 and 5 percentage points in hotel occupancy. In addition to the sargassum, there are other factors that are influencing the behavior of the occupation, such as the increase in houses for rent through platforms such as Airbnb and the issue of insecurity in the northern part of the State	NA	2019	NA	2019	Quintana Roo	Socioeconomic and environmental impacts	To analyze the impact of sargassum on tourism activity	A drope of between 2 and 5 percentage points in hotel occupancy was observed the year following a massive sargassum arrival. However, this hotel occupancy can´t be directly attributed to the sargassum phenomenom.	NA	NA	0	0	0	https://www.eleconomista.com.mx/estados/Ocupacion-hotelera-disminuye-en-el-Caribe-mexicano-20190807-0152.html
1030	Thesis	Indicadores del enriquecimiento de nutrientes en ecosistemas costeros del Norte del Caribe Mexicano.	Javier Alejandro Pérez Gómez	1	Academic sector	Centro de Investigación Científica de Yucatán (CICY)	Concentrations of N, C and δ15N in seagrasses and nutrient measurements in the water column were studied.	2018	2019	1	2019	Isla Contoy; Puerto Juarez; Puerto Morelos	Socioeconomic and environmental impacts	To determine the magnitude of nutrient enrichment and its effects on coastal ecosystems based on ecological and water quality indicators	A higher concentration of nutrients in the water column was recorded during the North season, possibly associated with higher precipitation and sediment resuspension. A possible influence of pelagic sargassum as a source of N for seagrass was detected.	Pérez-Gómez, J.A. 2019. Indicadores del enriquecimiento de nutrientes en ecosistemas costeros del Norte del Caribe Mexicano. Master Thesis. Centro de Investigación Científica de Yucatán, Cancún, Quintana Roo	Universidad de Colima; CICESE; University of California Santa Cruz (Dependency abroad); CONABIO (Government)	4	3	1
1040	Peer-reviewed scientific article	Indicators of nutrient enrichment in coastal ecosystems of the northern Mexican Caribbean	Javier A. Pérez Gómez; Ernesto García Mendoza; Aramis Olivos Ortiz; A. Paytand; M. Rebolledo Vieyrae; Benjamín Delgado Pecha; Antonio Almazán Becerril	7	Academic sector	Centro de Investigación Científica de Yucatán (CICY)	The concentrations of N, C and δ15N in seagrasses and the measurements of nutrients in the water column were studied to determine their effect in coastal ecosystems.	2018	2020	2	2020	Puerto Morelos; Puerto Juárez; Isla Blanca	Socioeconomic and environmental impacts	To determine the magnitude of nutrient enrichment and its effects on coastal ecosystems based on ecological and water quality indicators	A higher concentration of nutrients in the water column was recorded during the North season, possibly associated with higher precipitation and sediment resuspension. A possible influence of pelagic sargassum as a source of N for seagrass was detected.	Pérez-Gómez, J. A., García-Mendoza, E., Olivos-Ortiz, A., Paytan, A., Rebolledo-Vieyra, M., Delgado-Pech, B., & Almazán-Becerril, A. 2020. Indicators of nutrient enrichment in coastal ecosystems of the northern Mexican Caribbean. Ecological Indicators, 118, 106756.	Universidad de Colima; CICESE; University of California Santa Cruz (Dependency abroad); CONABIO (Government)	4	3	1
1050	Peer-reviewed scientific article	Faunal mortality associated with massive beaching and decomposition of pelagic Sargassum	R.E. Rodríguez Martínez; A.E. Medina Valmaseda; P. Blanchona; L.V. Monroy Velázquez; A. Almazán Becerril; B. Delgado Pech; L. Vásquez Yeomans; V. Francisco; M.C. García Rivase	9	Academic sector	Instituto de Ciencias del Mar y Limnología (ICML), UNAM	Between May and September 2018 there were several reports of mass mortality of marine biota related to brown tides. Demersal neritic fish and crustaceans were the most affected groups. The cause of mortality appears to be the combined effect of high concentrations of ammonia and hydrogen sulfide, along with hypoxic conditions.	2018	2019	1	2019	Mexican caribbean	Socioeconomic and environmental impacts	To report a mass mortality event of fauna along the Caribbean coast in 2018 associated with the massive influx of Sargassum spp. and its subsequent decomposition	The mortality of the fauna associated with the sargassum arrival event in 2018 extended along the Mexican Caribbean coast and a large number of species were affected	Rodríguez-Martínez, R. E., Medina-Valmaseda, A. E., Blanchon, P., Monroy-Velázquez, L. V., Almazán-Becerril, A., Delgado-Pech, B., ... & García-Rivas, M. C. 2019. Faunal mortality associated with massive beaching and decomposition of pelagic Sargassum. Marine Pollution Bulletin, 146, 201-205.	CICY; ECOSUR; CONANP (Government)	3	3	0
1060	Technical report	Diagnóstico de calidad del agua y caracterización de las dos especies de sargazo que arriban a las costas de Cancún, Puerto Morelos y Playa del Carmen	Dra. María Del Pilar Saldaña Fabela	1	Academic sector	Instituto Mexicano de Tecnología del Agua (IMTA)	Sargassum and water samples were collected in Quintana Roo for analysis of nutrients and metals. Sargassum species were determined. Enterobacteriaceae were isolated in the decomposing sargassum and Greenhouse Gas measurements were made.	NA	2019	NA	2019	Mahahual; Xcalak; Tulum; Playa del Carmen; Puerto Morelos; Punta Nizuc; Punta Cancún	Socioeconomic and environmental impacts	To conduct a regional sampling of sargassum and water	Anoxic conditions were observed in sargassum degradation zones. The decomposition of sargassum on the beaches and the contribution of nitrogen in its various forms and its assimilation promote the growth and vegetative reproduction of sargassum, which lead to changes in the habitat such as a decrease in light and transparency in the column of water, as well as increased organic matter in the sedi…	Saldaña-Fabela, M del P. 2019. Diagnóstico de calidad del agua y caracterización de las dos especies de sargazo que arriban a las costas de Cancún, Puerto Morelos y Playa del Carmen. IMTA-SEMARNAT. 64 pp.	SEMARNAT (Government)	1	1	0
1070	Media news (on projects)	Sargazo ahuyenta al turismo y afecta el coral en Quintana Roo	María del Carmen García Rivas; Lorenzo Álvarez Fillips	2	Academic sector	Instituto de Ciencias del Mar y Limnología (ICML), UNAM	The increase in the mortality of the barrier reef in Quintana Roo may be related to sargassum, whose decomposition generates sulfuric acid and could have adverse effects.	2018	2019	1	2019	Puerto Morelos	Socioeconomic and environmental impacts	NA	NA	NA	NA	0	0	0	https://www.eleconomista.com.mx/estados/Sargazo-ahuyenta-al-turismo-y-mata-el-coral-en-Quintana-Roo-expertos-20190326-0142.html
1080	Thesis	Efecto de la acumulación de sargazo en anidación, eclosión y sobrevivencia de tortugas marinas de Quintana Roo	Karla Fernanda Soto Rodríguez	1	Academic sector	Universidad Autónoma de Querétaro (UAQ)	The effect of sargassum accumulation on the reproductive capacity of sea turtles was evaluated on the beaches of Quintana Roo.	2018	2020	2	2020	Punta Venado; Paamul; Aventuras DIF; Chemuyil; Xcacel; XelHa; Punta Cadena; Tankah; Tulum; Kanzul; Cahpechen; Lirios Balandrin; Yuyum; San Juan	Socioeconomic and environmental impacts	To determine the impact of sargassum on the reproductive capacity and survival of turtles in Quintana Roo	Surveys of turtle monitoring experts revealed a negative effect of sargassum on hatching. In 2018, 40% fewer offspring were perceived compared to the previous year. The sargassum seems to obstruct the passage of the hatchlings towards the sea. Heavy machinery for cleaning sargassum also seems to influence the ability of turtles to nest. Sargassum nets also seem to have a negative effect by obstru…	Rodríguez-Soto, K.F. 2020. Efecto de la acumulación de sargazo en anidación, eclosión y sobrevivencia de tortugas marinas de Quintana Roo. Bachelors Thesis. Universidad de Querétaro. Querétaro.	Grupo Xcaret (Private sector); Programa de Conservación de Tortugas Marinas Riviera Maya Tulum (Civil society)	2	2	0
1090	Media news (on projects)	Submarino para estudiar las consecuencias del sargazo en aguas medianamente profundas	Adán Caballero Vázquez	1	Academic sector	Centro de Investigación Científica de Yucatán (CICY)	A submarine will help to understand the consequences of sargassum sinking in moderately deep waters.	2020	To date	To date	2021	Mexican caribbean	Socioeconomic and environmental impacts	To evaluate the health of the seabed and its possible affectation by the massive arrivals of sargassum.	NA	NA	NA	0	0	0	https://www.24-horas.mx/2020/03/10/submarino-estudiara-impacto-del-sargazo-en-profundidades/
1100	Peer-reviewed scientific article	Severe impacts of brown tides caused by Sargassum spp. on near-shore Caribbean seagrass communities.	Brigitta I. van Tussenbroek; Héctor A. Hernández Arana; Rosa E. Rodríguez Martínez; Julio Espinoza Avalos; Hazel M. Canizales Flores; Carlos E. González Godoy; M. Guadalupe Barba Santos; Alejandro Vega Zepeda; Ligia Collado Vides	9	Academic sector	Instituto de Ciencias del Mar y Limnología (ICML), UNAM	From mid-2014 to late 2015, the Mexican Caribbean coast experienced a massive influx of Sargassum spp. that accumulated on shorelines and resulted in their decomposition and brown, cloudy waters (brown tides).	2013	2017	4	2017	Mirador Nizuc; Puerto Morelos; Xahuayxol; Xcalak	Socioeconomic and environmental impacts	To assess the effects of sargassum brown tides on four nearshore seagrass communities along the Mexican Caribbean	Brown tides caused the reduction of light, oxygen (hypoxia or anoxia), and pH (i.e., eutrophication). Seagrasses dominated by Thalassia testudinum were replaced by a community dominated by calcareous rhizophytic algae and drift algae and/or epiphytes, resulting in a loss of 61.6% to 99.5% of substrate. Corals near the coast suffered total or partial mortality.	van Tussenbroek, B. I., Arana, H. A. H., Rodríguez-Martínez, R. E., Espinoza-Avalos, J., Canizales-Flores, H. M., González-Godoy, C. E., ... & Collado-Vides, L. 2017. Severe impacts of brown tides caused by Sargassum spp. on near-shore Caribbean seagrass communities. Marine Pollution Bulletin, 122(1-2): 272-281.	ECOSUR; FIU (Dependency abroad)	2	1	1
1110	Peer-reviewed scientific article	Element concentrations in pelagic sargassum along the Mexican Caribbean coast in 2018-2019	Rosa E. Rodríguez Martínez; Priyadarsi D. Roy; Nuria Torrescano Valle; Nancy Cabanillas Terán; Silvia Carrillo Domínguez; Ligia Collado Vides; Marta García Sánchez; Brigitta I. van Tussenbroek	8	Academic sector	Instituto de Ciencias del Mar y Limnología (ICML), UNAM	Harvest of sargassum would contribute to its sustainable management, so knowledge about the content of potentially toxic metals is necessary to define possible uses. We present concentrations of 28 chemical elements in sargassum collected between August 2018 and June 2019 in eight locations on the Mexican Caribbean coast.	2018	2020	2	2020	Isla Contoy; Xcalak	Potential uses	To estimate concentrations of 28 different elements in sargassum tissues collected in the Mexican Caribbean.	Arsenic concentrations in sargassum vary between 24-172 ppm dry weight, which exceeds the maximum limit allowed for use in animal feed and use in agricultural soils. Heavy metal analysis is recommended as a mandatory practice or to avoid the use of sargassum in direct animal or human consumption. There are 14 chemical elements commonly found in sargassum: Al, As, Ca, Cl, K, Mg, Mn, P, Rb, S, Si, …	Rodríguez-Martínez, R. E., Roy, P. D., Torrescano-Valle, N., Cabanillas-Terán, N., Carrillo-Domínguez, S., Collado-Vides, L., ... & van Tussenbroek, B. I. 2020. Element concentrations in pelagic Sargassum along the Mexican Caribbean coast in 2018-2019. PeerJ, 8, e8667.	ECOSUR; INCMNSZ; FIU (Dependency abroad); CEMIE-Océano; Manta México Caribe AC (Civil society)	5	4	1
1120	Media news (on projects)	Campañas oceanográficas CEMIE-Océano	Dr. Rodolfo Silva Casarín	1	Academic sector	Centro Mexicano de Innovación en Energía Océano (CIMIE-Oceano)	An oceanographic cruise sails within the framework of the CEMIE-Océano project. Sargazo will be collected and analyzed. In another expedition, called "SarGo", scientists from UNAM, the Royal Dutch Institute for Marine Research and specialists from CEMIE-Océano studied the morphology and taxonomy of the macroalgae.	NA	2019	NA	2019	Cozumel; Mexican Caribbean	Origin and ecological importance	To collect sargassum and characterize it by studying the morphology and taxonomy of the macroalgae and determining the conditions in which it develops, for later commercial use.	NA	NA	CONACYT (Government); SEMAR (Government)	2	2	0	https://cemieoceano.mx/camp-oceano.html http://www.ii.unam.mx/es-mx/AlmacenDigital/Notas/Paginas/SarGo.aspx
1130	Technical report	Lineamientos Técnicos y de Gestión para la Atención de la Contingencia Ocasionada por Sargazo en el Caribe Mexicano y el Golfo de México	Isabel María Hernández Toro (Coordinadora de actualización 2020)	1	Government sector	Secretaría de Medio Ambiente y Recursos Naturales (SEMARNAT)	Technical and management guidelines are established for the specific actions of sargassum harvest on the high seas, containment, removal on beaches and final disposal (including the use of tools and mechanized equipment).	NA	2020	NA	2020	Gulf of Mexico; Mexican caribbean	Regulations	To guide actions in all population sectors regarding removal of sargassum.	These guidelines establish the technical specifications for sargassum harvest in the open sea, containment and removal at barriers, removal on beaches, treatment prior to final disposal, as well as the final disposal.	Lineamientos Técnicos y de Gestión para la Atención de la Contingencia Ocasionada por Sargazo en el Caribe Mexicano y el Golfo de México. 2020. SEMARNAT. 44 pp.	CONACYT (Government); INECC (Government); SEMAR (Government); CONAGUA (Government); SECTUR (Government); UNAM; INAPESCA (Government); CICY	8	8	0
1140	Peer-reviewed scientific article	Presence of Polyphenols Complex Aromatic “Lignin” in Sargassum spp. from Mexican Caribbean	Liliana Alzate Gaviria; Jorge Domínguez Maldonado; Rubí Chablé Villacís; Edgar Olguin Maciel; Rosa María Leal Bautista; Gonzalo Canché Escamilla; Adán Caballero Vázquez; Cecilia Hernández Zepeda; Felipe Alonso Barredo Pool; Raúl Tapia Tussell	10	Academic sector	Centro de Investigación Científica de Yucatán (CICY)	This work is the first report of the presence of lignin in the secondary cell wall of sargassum.	2019	2020	1	2020	Puerto Morelos	Potential uses	To characterize complex polyphenolic compounds in Sargassum spp.	Relevant and new information on the unique cell wall architecture of these marine algae was provided. This will allow a more efficient pretreatment to access the valuable compounds offered by the sargassum with respect to the uses associated with biorefinery.	Alzate-Gaviria, L.; Domínguez-Maldonado, J.; Chablé-Villacís, R.; Olguin-Maciel, E.; Leal-Bautista, R.M.; Canché-Escamilla, G.; CaballeroVázquez, A.; Hernández-Zepeda, C.; Barredo-Pool, F.A.; Tapia-Tussell, R. 2021.Presence of Polyphenols Complex Aromatic “Lignin” in Sargassum spp. from Mexican Caribbean. J. Mar. Sci. Eng. 9, 6. https://dx.doi.org/10.3390/jmse9010006	NA	0	0	0
1150	Peer-reviewed scientific article	Temporal changes in the composition and biomass of beached pelagic Sargassum species in the Mexican Caribbean	Marta García Sánchez; Caroline Graham; Elisa Vera; Edgar Escalante Mancera; Lorenzo Álvarez Filip; Brigitta I. van Tussenbroek	6	Academic sector	Instituto de Ciencias del Mar y Limnología (ICML), UNAM	The biomass and composition of sargassum that reached the Mexican Caribbean coast from September 2016 to May 2020 was analyzed. This study reveals that the species composition and morphotypes of sargassum in Mexico differ from those commonly reported in the Sea of the Sargasso. This study may help understand patterns of massive influxes which will contribute to the management of this phenomenon.	2016	2020	4	2020	Puerto Morelos	Origin and ecological importance	To systematic monitoring beaches in the Mexican Caribbean coast from 2016 to 2020 to determine sargassum species, their quantity and composition.	In 2016, the stranded species included S. natans VIII and S. fluitans III. S. fluitans III was the predominant form throughout the study period, comprising on average > 60% of the total wet biomass. The relative abundance of S. natans VIII decreased from 2016 to 2019 (41 to 3%), although it prevailed again in the first months of 2020. The third morphological form, S. natans I, was not recorded un…	García-Sánchez, M., Graham, C., Vera, E., Escalante-Mancera, E., Álvarez-Filip, L., & van Tussenbroek, B. I. 2020. Temporal changes in the composition and biomass of beached pelagic Sargassum species in the Mexican Caribbean. Aquatic Botany, 167, 103275.	CEMIE-Océano	1	1	0
1160	Peer-reviewed scientific article	Molecular assessment of the genus Sargassum (Fucales, Phaeophyceae) from the Mexican coasts of the Gulf of Mexico and Caribbean, with the description of S. xochitlae sp.	Donají González Nieto; Mariana C. Oliveira; María Luisa Núñez Resendiz; Kurt M. Dreckmann; Luz Elena Mateo Cid; Abel Sentíes	6	Academic sector	Universidad Autónoma Metropolitana (UAM)	Sargassum species identification is complicated because morphological characters show phenotypic variations based on habitat, season, or population-level differences. To solve some of these problems, molecular analyzes of Sargassum species were performed using DNA sequences of some genetic markers.	2019	2020	1	2020	Punta Delgada; Playa Los Muñecos; Villa Rica; Playa El Morro (La Mancha); Playa Hermosa; Playa Escondida; Punta Brava; Playa Caracol; Tulum; Isla Mujeres; Cozumel; Playa Garrafón; Playa Azul; Hotel Cozumel; Chankanab; Playa San Francisco; Punta Chiquero; Chen Río; Punta Morena.	Origin and ecological importance	To obtain a more reliable estimate of sargassum diversity.	Phylogenetic analyzes of three molecular markers showed that 10 species were grouped in a polytomy, with low genetic diversity. Taxonomic independence was confirmed only for S. platycarpum and our data revealed a new morphologically and molecularly independent species within the genus, described here as Sargassum xochitlae.	Gonzalez-Nieto, D., Oliveira, M. C., Resendiz, M. L. N., Dreckmann, K. M., Mateo-Cid, L. E., & Senties, A. 2020. Molecular assessment of the genus Sargassum (Fucales, Phaeophyceae) from the Mexican coasts of the Gulf of Mexico and Caribbean, with the description of S. xochitlae sp. nov. Phytotaxa, 461(4): 254-274.	Universidade de São Paulo (Dependency abroad); IPN	2	1	1
1170	Article or presentation at scientific meeting or congress	Aislamiento y selección de bacterias halófilas celulóticas, amilolíticas, y proteolíticas presentes en muestras de sargazo de arribazon recolectadas en la zona costera del estado de Yucatán	Manuel Montalvo Molina; Priscila Mezquita Manzanilla; Jorge Tamayo Cortes; José Benigno Escamilla Sánchez; Sara Solís Pereira; Gerardo Rivera Muñoz	6	Academic sector	Instituto Tecnológico de Mérida (ITM)	It is intended to establish a process focused on the use of sargassum in the production of bioethanol or enzymes of industrial interest.	NA	2015	NA	2015	Mérida	Potential uses	To isolate and select halophilic bacteria involved in the natural degradation process of sargassum, through the production of enzymes that hydrolyze the polymers.	It was possible to isolate 57 bacterial strains, of which 24 grew in culture media formulated with seawater and 33 grew in media formulated with distilled water. Five cellulolytic, 4 amylolytic and 15 proteolytic bacteria were isolated using culture media formulated with seawater while 16 amylolytic and 17 proteolytic strains were recovered from the culture media formulated with distilled water.	Montalvo Molina et al., 2015. Aislamiento y selección de bacterias halofilas celuloticas, amiloliticas, y proteoliticas presentes en muestras de sargazo de arribazon recolectadas en la zona costera del estado de yucatan. XVI Congreso Nacional de Biotecnología y Bioingienería. Guadalajara, Jalisco.	NA	0	0	0
1180	Media news (on projects)	Aprovechamiento integral del sargazo	Gerardo Rivera Muñoz	1	Academic sector	Instituto Tecnológico de Mérida (ITM)	This project seeks to have sound biotechnological bases to take advantage of the sargassum in a sustainable way and to create useful products for agriculture, industry and medicine.	2019	To date	To date	2020	Quintana Roo	Potential uses	To develop products such as rooters, fertilizers and moisturizers from the sugars present in sargassum and seagrass	NA	NA	NA	0	0	0	https://elpeninsular.mx/aprovechamiento-integral-del-sargazo/
1190	Peer-reviewed scientific article	Practical and theoretical modeling of anaerobic digestion of Sargassum spp. in the Mexican Caribbean	Héctor López Aguilar; Guadalupe Kennedy Puentes; Jorge Gómez; Enrique Huerta Reynoso; María del Rosario Peralta Pérez; Francisco Zavala Díaz de la Serna; Antonino Pérez Hernández	7	Academic sector	Universidad La Salle	This research evaluates the potential of Sargassum spp. of the Mexican Caribbean coast to be used in the production of biomethane estimating: a) the stoichiometric production of methane (SMP), b) the biochemical potential of methane (BMP) and c) the biodegradability index (BI).	2019	2020	1	2020	Cancún	Potential uses	To conduct practical-theoretical modeling of the anaerobic digestion of sargassum and its conversion into biogas.	Preliminary results show the potential of sargassum for biomethane production.	López-Aguilar, H; Kennedy-Puentes, G; Gómez, J; Huerta-Reynoso, E; Peralta-Pérez, M; Zavala-Díaz de la Serna, F & Pérez-Hernández, A. 2021. Practical and theoretical modeling of anaerobic digestion of Sargassum spp. in the Mexican Caribbean. Pol. J. Environ. Stud. In press.	CIMAV; UACH	2	2	0
1200	Thesis	Composición de isótopos estables de carbono y nitrógeno en especies pelágicas de sargazo	Lilia Imelda Martínez Rodríguez	1	Academic sector	Centro de Investigaciones Biológicas del Noroeste S.C (CIBNOR)	Stable isotopes of carbon and nitrogen were analyzed, as well as the elemental content of carbon, nitrogen and phosphorus in pelagic species of sargassum in order to compare the isotopic and chemical signals between different species.	2018	2020	2	2020	Puerto Morelos	Origin and ecological importance	To characterize the composition of stable isotopes of carbon (δ13C) and nitrogen (δ15N) and the elemental relationship of C, N and P in pelagic species of sargassum that arrive at the coastal zone of Puerto Morelos, Quintana Roo, Mexico	The pelagic species were S. fluitans III, S. natans I and S. natans VIII, which had significant differences in δ13C and δ15N. Significantly depleted values ​​of δ13C were observed in S. fluitans III; while for δ15N, the species S. natans I showed significantly more impoverished values ​​with respect to the other two species. The δ13C signals suggested that pelagic sargassum species use some mecha…	Martínez Rodríguez, L.I. 2020. Composición de isótopos estables de carbono y nitrógeno en especies pelágicas de sargazo. Master Thesis. CIBNOR, La Paz, Baja California Sur	ICML; CINVESTAV	2	2	0
1210	Peer-reviewed scientific article	Epibiont hydroids on beachcast Sargassum in the Mexican Caribbean	María A. Mendoza Becerril; Elisa Serviere Zaragoza; Alejandra Mazariegos Villarreal; Crisalejandra Rivera Perez; Dale R. Calder; Erika F. Vázquez-Delfín; Yolanda Freile Pelegrín; José Agüero; Daniel Robledo	9	Academic sector	Centro de Investigaciones Biológicas del Noroeste S.C (CIBNOR)	The occurrence and percentage of coverage of hydroids in sargassum collected on the beach of Puerto Morelos, Quintana Roo, Mexico was analyzed	2018	2021	3	2021	Puerto Morelos	Origin and ecological importance	To analyze stranded sargassum samples to determine (1) species richness of epibiont hydroids; (2) the monthly and/or seasonal occurrence and percentage cover of hydroids in the algae; (3) presence of hydroids in the different structures of the algae (4) differences in the composition of hydroids between morphotypes.	A total of 14 hydroid taxa, belonging to the superorders Anthoathecata and Leptothecata, were identified. More hydroid taxa were observed in stems than in leaves or sargassum aerocysts. The greatest richness of hydroid species was observed from February to April. The results show that the living hydrozoans were attached to the pelagic sargassum and were transported to the study area.	Mendoza-Becerril MA, Serviere-Zaragoza E, Mazariegos-Villarreal A, Rivera-Perez C, Calder DR, Vázquez-Delfín EF, Freile-Pelegrín Y, Agüero J, Robledo D. 2020. Epibiont hydroids on beachcast Sargassum in the Mexican Caribbean. PeerJ 8:e9795 DOI 10.7717/peerj.9795	Medusozoa México (Civil society); CINVESTAV; Royal British Columbia Museum (Dependency abroad); Royal Ontario Museum (Dependency abroad)	4	2	2
1220	Peer-reviewed scientific article	Motile macrofauna associated with pelagic Sargassum in a Mexican reef lagoon	Luz Veronica Monroy Velazquez; Rosa Elisa Rodríguez Martínez; Brigitta I. van Tussenbroek; Teresa Aguiar; Vivianne Solís Weiss; Patricia Briones Fourzan	6	Academic sector	Instituto de Ciencias del Mar y Limnología (ICML), UNAM	A sampling of the mobile macrofauna associated with pelagic Sargassum rafts in the reef lagoon of Puerto Morelos was conducted.	2018	2019	1	2019	Puerto Morelos	Origin and ecological importance	To evaluate the differences in abundance and diversity of the mobile macrofauna community associated with pelagic sargassum in a reef lagoon.	In the 108 samples obtained, 32 taxa distributed in eight phyla were observed. The main groups were Arthropoda (48%), Annelida (41%) and Mollusca (15%). Fish abundance was low with only five species, of which three are typically associated with sargassum rafts and two are common in seagrass beds and coral reefs. The composition of species and the abundance of mobile macrofauna varied with month a…	Monroy-Velázquez, L. V., Rodríguez-Martínez, R. E., van Tussenbroek, B. I., Aguiar, T., Solis-Weiss, V., & Briones-Fourzán, P. 2019. Motile macrofauna associated with pelagic Sargassum in a Mexican reef lagoon. Journal of environmental management, 252, 109650.	SEMA (Government)	1	1	0
1230	Thesis	Composición taxonómica y abundancia de la macrofauna asociada a Sargassum (Phaeophyceae: fucales) flotante en el sistema arrecifal veracruzano, suroeste del Golfo de México.	Ana Nereida Muñoz Bautista	1	Academic sector	Universidad Veracruzana	The macrofauna associated with floating sargassum in the PNSAV was analyzed, estimating the abundance, species richness and indices of diversity, equity, taxonomic distinction and similarity.	2011	2013	2	2013	Parque Nacional Sistema Arrecifal Veracruzano (PNSAV)	Origin and ecological importance	To determine the structure of the macrofaunistic community associated with floating Sargassum and its relationship with the algal biomass in the Veracruz Reef System National Park.	A total of 33 species associated with sargassum were recorded. The characteristic phylum were: Crustacea with 91%; Chordata with 1%; Annelida 3%, Platyhelminthes 2%, Mollusca 4% and Cnidaria with less than 1%. The correlation analysis determined that as the biomass of the algae increases, the number of associated organisms increases. The richness of species and diversity of phyla found in the flo…	Muñoz-Bautista, A. 2013. Composición taxonómica y abundancia de la macrofauna asociada a Sargassum (Phaeophyceae: fucales) flotante en el sistema arrecifal veracruzano, suroeste del Golfo de México. Master Thesis. Universidad Veracruzana. Boca del Río, Veracruz.	Acuario de Veracruz A. C. (Civil society)	1	1	0
1240	Peer-reviewed scientific article	Pelagic Sargassum spp. capture CO 2 and produce calcite.	Francisco Paraguay Delgado; Caleb Carreño Gallardo; Ivanovich Estrada Guel; Alberto Zabala Arceo; Harby Alexander Martinez Rodriguez; Daniel Lardizábal Gutierrez	6	Academic sector	Centro de Investigación en Materiales Avanzados SC (CIMAV)	The proliferation of sargassum could be playing an important role in reducing global warming, since it removes a high content of CO2 from the atmosphere and transforms it into calcium carbonate, in its calcite phase, producing sediments.	2019	2020	1	2020	Chetumal	Origin and ecological importance	To quantify the amount of calcite in Sargassum samples collected on the Mexican Caribbean coast in 2019.	It was determined that approximately 5% of the CO2 captured by sargassum is converted to calcite. By extrapolation it can be determined that the Atlantic Sargassum Belt retained approximately 19.3 million tons of CO2 from 2011 to 2019	Paraguay-Delgado, F., Carreño-Gallardo, C., Estrada-Guel, I., Zabala-Arceo, A., Martinez-Rodriguez, H. A., & Lardizábal-Gutierrez, D. 2020. Pelagic Sargassum spp. capture CO 2 and produce calcite. Environmental Science and Pollution Research, 27(20): 25794-25800.	ITCH; Universidad Nacional de Colombia (Dependency abroad)	2	1	1
1250	Peer-reviewed scientific article	A comparative study of Sargassum species from the coast of the Yucatan Peninsula: morphological and chemical characterization	Luis Alberto Rosado Espinosa; Yolanda Freile Pelegrín; Emanuel Hernández Nuñez; Daniel Robledo	4	Academic sector	Centro de Investigación y de Estudios Avanzados (CINVESTAV) Mérida, IPN	The plasticity of Sargassum makes it difficult to identify its species. Two approaches were used in this study to corroborate the identification of species: Traditional taxonomic and chemical characterization. For the former, the morphological characteristics of the cryptostomata and the floating vesicles were identified. For the later, two cell wall polysaccharides, alginate and fucoidan, were e…	2014	2019	5	2019	Mérida	Origin and ecological importance	To describe the differences of different Sargassum species in Yucatan.	A chemical analysis is useful to aid in the taxonomic identification of Sargassum species.	Luis Alberto Rosado-Espinosa , Yolanda Freile-Pelegrín , Emanuel HernándezNuñez & Daniel Robledo. 2020. A comparative study of Sargassum species from the Yucatan Peninsula coast: morphological and chemical characterisation, Phycologia, 59(3): 261-271, DOI:10.1080/00318884.2020.1738194	NA	0	0	0
1260	Thesis	Caracterización ficológica de comunidades bentónicas y de arribazón en Dzilam de Bravo, Yucatán.	Luis Alberto Rosado Espinosa	1	Academic sector	Universidad Autónoma de Yucatán (UAY)	This work intends to provide information about the places of origin of macroalgae, their taxonomy, biomass, seasonality and factors that intervene in said phenomenon.	2010	2012	2	2012	Puerto Dzilam de Bravo	Origin and ecological importance	To determine the composition, abundance and distribution of macroalgae biomass	The most abundant species found in this study were: Sargassum filipéndula, Sporochnus pedunculatus, Padina ssp, Halymenia floresii, H. elongata, Meristotheca gelidium, Gracilaria cervicornis, Caulerpa racemosa, C. prolifera and C. paspaloides. Biomass was dominated by Sargassum ssp.	Rosado-Espinosa, L.A. 2012. Caracterización ficológica de comunidades bentónicas y de arribazón en Dzilam de Bravo, Yucatán. Master Thesis. Universidad de Yucatán. Mérida, Yucatán	CINVESTAV	1	1	0
1270	Peer-reviewed scientific article	Pelagic Sargassum as an emerging vector of high rate carbonate sediment import to tropical Atlantic coastlines	Michael A. Salter; Rosa E. Rodríguez Martínez; Lorenzo Álvarez Filip; Eric Jordán Dahlgren; Chris T. Perry	5	Academic sector	Instituto de Ciencias del Mar y Limnología (ICML), UNAM	The massive influxes of sargassum could represent a new source of carbonated sediments in the affected coastal areas. These types of sediments are derived from calcareous epiphytic communities that colonize sargassum (eg, bryozoans, serpulid worms, and red algae), and if they are volumetrically important, they can help counteract negative aspects of influxes related to beach erosion due to cleani…	2018	2020	2	2020	Quintana Roo	Origin and ecological importance	To determine the carbonate content in sargassum of Caribbean coastal waters.	Our findings indicated that sargassum influxes to the Mexican Caribbean contribute an average of 179 kg of CaCO3 per meter of coastline. This contribution is close to the largest contribution produced by seagrasses (210 kg per meter).	M.A. Salter, R.E. Rodríguez-Martínez, L. Álvarez-Filip, et al., 2019. Pelagic Sargassum as an emerging vector of high rate carbonate sediment import to tropical Atlantic coastlines, Global and Planetary Change. https://doi.org/10.1016/j.gloplacha.2020.103332	University of Exeter (Dependency abroad)	1	0	1
1280	Media news (on projects)	Sargazo y cambio climático en el Caribe	Guadalupe Velázquez Olimán	1	Civil society	Centro de Innovación e Investigación para el Desarrollo Sustentable A.C. (CIDES)	The development of a project is presented and includes containment mechanisms for sargassum at sea, harvest with small boats and conveyor belts and the final use of sargassum for restoration of dunes, natural fertilizers and feed for livestock.	2015	To date	To date	2015	Quintana Roo	Restoration	NA	NA	NA	NA	0	0	0	https://www.mx.undp.org/content/mexico/es/home/presscenter/articles/2015/12/10/sargazo-y-cambio-clim-tico-en-el-caribe.html
1290	Technical report	Estudio del estado del arte científico y tecnológico del sargazo	Agustín Escamilla Martínez	1	Academic sector	Centro de Investigación y Asistencia Técnica del Estado de Querétaro, A.C (CIATEQ)	This report presents and overview of the sargassum phenomenom, with a focus on tech impacts in Mexico	2018	2019	1	2019	NA	communication and education	NA	NA	CIATEQ-CONACYT. 2019. Estudio del estado del arte científico y tecnológico del sargazo. Queretaro, Mexico.	CONACYT (Government)	1	1	0
1300	Technical report	Agenda de Ciencia, Tecnología e Innovación para la Atención, Adaptación y Mitigación del arribo de sargazo pelágico a México	Erika Vázquez Delfín; Daniel Robledo (et al)	2	Government sector	Consejo Nacional de Ciencia y Tecnología (CONACYT)	During 2019, under the coordination of CONACYT, a scientific, technological and innovation Agenda was defined for the attention, adaptation and mitigation of the massive influxes of sargassum to the Mexican coast. The Agenda defines nine strategic and multidisciplinary lines to address the sargassum phenomenon in a comprehensive manner: 1) containment, collection and disposal, 2) regulations, 3) …	NA	2019	NA	2019	NA	communication and education	To identify strategic areas for the development of capacities and the generation of knowledge for the attention, adaptation and mitigation of the massive influxes of sargassum in Mexico.	Conacyt Agenda	CONACYT, SEMAR, SEMARNAT, SRE, TURISMO, INECC, CONABIO, IMTA, COQCYT. 2019. Agenda de Ciencia, Tecnología e Innovación para la Atención, Adaptación y Mitigación del arribo de sargazo pelágico a México. Puerto Morelos, Quintana Roo. 32 pp.	SEMAR (Government), SEMARNAT (Government), SRE (Government), SECTUR (Government), INECC (Government), CONABIO (Government), IMTA (Government), COQCYT (Government)	8	8	0	https://www.conacyt.gob.mx/sargazo/index.php/agenda-de-ciencia-y-tecnologia
1310	Peer-reviewed divulgation article	Arribazón de sargazo en la península de Yucatán: ¿Problema local, regional o mundial?	Ileana Ortegón Aznar; Valery Ávil Mosqueda	2	Academic sector	Universidad Autónoma de Yucatán (UAY)	An attempt is made to clarify various aspects of the arrival of sargassum to the coast of the Yucatan peninsula	NA	2021	NA	2021	NA	Origin and ecological importance	To determine various aspects related to sargassum strandings in the Yucatan Peninsula	A general framework of sargassum influxes, their definition, origin, importance and future for commercial use is presented.	Ortegón-Aznar, Ileana & Ávila-Mosqueda, Valery. (2021). Arribazón de sargazo en la península de Yucatán: ¿Problema local, regional o mundial?. Bioagrociencias 13(2): 28-37.	UNAM	1	1	0
1320	Website	Riesgos emergentes en relación a las arribazones de sargazo en México	NA	1	Private sector	BANORTE Research	The massive influxes of sargassum to Caribbean beaches represent important risks for the region at an economic and environmental level, which is why, we develop guides with recommendations for prevention and management. In addition, since 2019, we have been monitoring the status of the phenomenon on a monthly basis to understand the effects on tourism activity as well as the actions to prevent it…	2018	To date	To date	2019	NA	Socioeconomic and environmental impacts	To generate reports that inform and support the decision-making process.	Annual reports	NA	NA	0	0	0	https://investors.banorte.com/es/sustainability/sustainability-model/riesgos-emergentes
1330	Peer-reviewed scientific article	Massive Influx of Pelagic Sargassum spp. on the Coasts of the Mexican Caribbean 2014–2020: Challenges and Opportunities	Valeria Chávez; Abigail Uribe Martínez; Eduardo Cuevas; Rosa E. Rodríguez Martínez; Brigitta I. van Tussenbroek; Vanessa Francisco; Miriam Estévez; Lourdes B. Celis; L. Verónica Monroy Velázquez; Rosa Leal Bautista; Lorenzo Álvarez Filip; Marta García Sánchez; Luis Masia; Rodolfo Silva	14	Academic sector	Instituto de Ingeniería, UNAM	We used Landsat 8 images to understand the dynamics of sargassum influx to the Mexican Caribbean coast.	2016	2020	4	2020	Mexican caribbean	Origin and ecological importance	To present a general panorama of the massive sargassum influxes in the Mexican Caribbean, from a physical, ecological, social and economic perspective. Decision makers in the region need this information to design solutions and delploy an efficient management.	A maximum of sargassum was recorded in September 2018. Analysis of satellite images also showed differences in the amount of sargassum stranded along the coast. Sargassum has several properties that could be used in local industries and a circular economy must be developed	Chávez, V., Uribe-Martínez, A., Cuevas, E., Rodríguez-Martínez, R. E., van Tussenbroek, B. I., Francisco, V., ... & Silva, R. 2020. Massive Influx of Pelagic Sargassum spp. on the Coasts of the Mexican Caribbean 2014–2020: Challenges and Opportunities. Water, 12(10): 2908.	UNACAR; Parque Nacional Arrecife de Puerto Morelos (Government); IPICYT; CICY; Creamos más S.A. de C.V (Private sector)	5	5	0
1340	Peer-reviewed divulgation article	Las arribazones de algas marinas en el Caribe mexicano: Evento biológico natural o basura en las playas	Kurt M. Dreckmann; Abel Sentíes	2	Academic sector	Universidad Autónoma Metropolitana (UAM)	An overview of available studies about the taxonomic composition of sargassum, the causes and mechanisms, seasonality, regionalization, and potential uses, is presented.	NA	2013	NA	2013	NA	Origin and ecological importance	To present a general overview of sargassum phenomenom in the Mexican Caribbean	Divulgation paper	Dreckmann, K. M & Sentíes, A. 2013. Las arribazones de algas marinas en el Caribe mexicano: Evento biológico natural o basura en las playas. Biodiversitas CONABIO, 7: 7-11	NA	0	0	0
1350	Peer-reviewed divulgation article	El sargazo a escena	Cuauhtémoc León	1	Civil society	Centro de Especialistas en Gestión Ambiental (CEGAM)	This work reviews the evolution of the sargassum biological phenomenon and explores the social responses as well as media and tourism sector perceptions.	NA	2019	NA	2019	NA	Origin and ecological importance	To explore public policy arguments and explore the human activities that have directly or indirectly influenced the sargassum massive influxes.	The effect of sargassum on the beaches have affected the landscape and, therefore, is an important disincentive for bathers and visitors of these crystal clear waters. Comprehensive responses must be given to a phenomenon that will persist in the future.	León, C. 2020. El sargazo a escena. Salud Pública de México, 61, 701-703.	NA	0	0	0
1360	Description of funded projects	Manejo costero integrado como medida de adaptación al cambio climático	Steven P.R. Czitrom Baus; Iván Penié Rodríguez; Jail I. Cruz García; Vivianne Solís Weiss	4	Academic sector	Instituto de Ciencias del Mar y Limnología (ICML), UNAM	An integrated coastal management initiative is proposed to address future massive arrivals of sargassum in the Mexican Caribbean	2019	To date	To date	2019	NA	Origin and ecological importance	NA	NA	NA	Yook’ol Kaab Consultoría S.A. de C.V (Private sector); MYWORLD México (Civil society).	2	2	0	https://www.ipgh.org/assets/12.-unam-.pdf
1370	Peer-reviewed divulgation article	Sargazo: la irrupción atípica de un ecosistema milenario	Gustavo Martínez González	1	Government sector	Ayuntamiento de Solidaridad, Quintana Roo	An overview of the effects of Sargassum influxes to the Mexican Caribbean is presented.	NA	2019	NA	2019	NA	Origin and ecological importance	To provide a general perspective of the sargassum phenomenon in the Mexican Caribbean	Divulgation paper	Martínez-González G. 2019. Sargazo: la irrupción atípica de un ecosistema milenario. Salud Pública de México, 61:698-700	NA	0	0	0
1380	eBook/Gazette/Newsletter	Sargassum in the Mexican Caribbean: from denial and voluntarism to reality	Alfonso Aguirre Muñoz	1	Civil society	Grupo de Ecología y Conservación de Islas, A.C	A general overview of sargassum influxes to the Mexican Caribbean is presented with a focus on the current research needs and technological development that facilitate possible uses of sargassum.	NA	2019	NA	2019	NA	Origin and ecological importance	To provide a general perspective of the sargassum phenomenon in the Mexican Caribbean	Divulgation paper	Aguirre-Muñoz, A. 2019. El sargazo en el Caribe mexicano: de la negación y el voluntarismo a la realidad. Sustentabilidad, Gaceta Digital del Centro Interdisciplinario de Biodiversidad y Ambiente, A.C. CeIBA. 2: 1-12	NA	0	0	0
1390	Technical report	Servicio de consultoría para establecer los Planes de Manejo de Especies Exóticas Invasoras en las áreas naturales protegidas: Los Tuxtlas, Sian Ka'an, Cañón del Sumidero y Valle de Bravo	José Juan Flores Martínez; Cecilia González Martínez; Ricardo Augusto Rodríguez Medina; Verónica Noemí Zepeda Martínez; Carlos Jair Muñoz Rodríguez; Sheila Lizbeth Gachuz Delgado; Víctor Sánchez Cordero Dávila	7	Civil society	Ciencia y Comunidad por la Conservación, A.C	In order to favor the conservation of ecosystems, it is necessary to generate regulatory instruments that promote planning, comprehensive attention and the establishment of mechanisms to prevent, control or remedy the impacts caused by invasive species in Natural Protected Areas of Mexico.	2018	2019	1	2019	Sian Ka'an	Origin and ecological importance	To develop strategies for invasive species in the four Natural Protected Areas, by updating the available information and preparing Management Plans.	Goals and needs were defined regarding the effects of exotic species in the Sian Ka'an reserve, including sargassum landings	Reserva de la Biosfera Sian Ka'an. Servicio de consultoría para establecer los Planes de Manejo de Especies Exóticas Invasoras en las áreas naturales protegidas: Los Tuxtlas, Sian Ka'an, Cañón del Sumidero y Valle de Bravo. Proyecto GEF 00089333 “Aumentar las capacidades Nacionales para el Manejo de las Especies Exóticas Invasoras (EEI) a través de la Implementación de la Estrategia Nacional de E…	Reserva de la biósfera de Sian Ka'an (Civil society); CONABIO (Government); CONANP (Government); GEF (Dependency abroad); PNUD (Dependency abroad)	5	3	2
1400	Description of funded projects	Estudios de calidad de sedimentos debido a la presencia excesiva de sargazo en las playas de Cancún y en las playas de Sianka´an, Península de Yucatán, México	Jonathan Muthuswamy Ponniah	1	Academic sector	Centro Interdisciplinario de Investigaciones y Estudios sobre Medio Ambiente y Desarrollo (CIIEMAD) IPN	NA	2019	To date	To date	2020	Cancún; Sianka´an	Socioeconomic and environmental impacts	NA	NA	NA	NA	0	0	0
1410	Description of funded projects	Producción de bioetanol y compuestos furfurales a partir de sargazo mediante biotecnología microbiana	Juan Carlos Villalobos Rocha	1	Academic sector	Escuela Nacional de Ciencias Biológicas (ENCB), IPN	NA	2019	To date	To date	2020	NA	Potential uses	NA	NA	NA	NA	0	0	0
1420	Description of funded projects	Búsqueda de la posible utilidad terapéutica de algunas especies de Sargassum spp. que forman el sargazo del Caribe mexicano	Myrna Deciga Campos	1	Academic sector	Escuela Superior de Medicina (ESM), IPN	NA	2019	To date	To date	2020	NA	Potential uses	NA	NA	NA	NA	0	0	0
1430	eBook/Gazette/Newsletter	Notas sobre las arribazones de sargazo en el Caribe mexicano	Antonio Almazán Becerril	1	Academic sector	Centro de Investigación Científica de Yucatán (CICY)	A general overview of the sargassum that arrives to the Mexican Caribbean is presented	NA	2018	NA	2018	NA	Origin and ecological importance	To provide a general overview of sargassum influxes to the Mexican Caribbean	Newsletters	Boletín informativo de la Red Temática sobre florecimientos algales nocivos. 7: 12-14	NA	0	0	0
1440	eBook/Gazette/Newsletter	El sargazo en el Caribe mexicano, revisión de una historia impensable	A. Uribe Martínez; A. Guzmán Ramírez; F. Arreguín Sánchez; E. Cuevas	4	Academic sector	Universidad Nacional Autónoma de México (UNAM)	A general review of the sargassum topic is offered. A hypothesis of the association between the anomalous growth and dispersion of sargassum and interdecadal atmospheric phenomena is included. A first approximation to indicators of potential ecological impacts in sensitive areas of the Mexican Caribbean coasts is also offered.	NA	2020	NA	2020	NA	Origin and ecological importance	To provide a general overview of sargassum influxes to the Mexican Caribbean	Book chapter	Uribe-Martínez, A., et al. El sargazo en el Caribe mexicano, revisión de una historia impensable. En: Rivera-Arriaga, E., I. Azuz-Adeath, O. D. Cervantes Rosas, A. Espinoza-Tenorio, R. Silva Casarín, A. Ortega-Rubio, A. V. Botello y B. E. Vega-Serratos (eds.), 2020. Gobernanza y Manejo de las Costas y Mares ante la Incertidumbre. Una Guía para Tomadores de Decisiones. Universidad Autónoma de Camp…	NA	0	0	0
1450	eBook/Gazette/Newsletter	Afluencia masiva de sargazo pelágico a la costa del Caribe mexicano (2014-2015)	Rosa Elisa Rodríguez Martínez; Brigitta van Tussenbroek; Eric Jordán Dahlgren	3	Academic sector	Instituto de Ciencias del Mar y Limnología (ICML), UNAM	The impact of sargassum arrivals in 2014 and 2015 in the Mexican Caribbean is described, including the effects on coastal ecosystems, human health and the tourism industry, as well as the actions undertaken by different stakeholders for the removal, transport, use and disposal of sargassum.	NA	2016	NA	2016	Mexican caribbean	Origin and ecological importance	To provide a general overview of sargassum influxes to the Mexican Caribbean	The need to have a robust monitoring system that allows effective management strategies, is recognized.	Rodríguez-Martínez, Rosa & Tussenbroek, Brigitta & Jordán-Dahlgren, Eric. Afluencia masiva de sargazo pelágico a la costa del Caribe mexicano (2014-2015). En: Florecimientos algales nocivos en México. Eds: García-Mendoza E, Quijano-Scheggia SI, Olivos-Ortiz A, Núñez-Vázquez EJ. 1 (5): 352-365. CICESE.	NA	0	0	0
1460	Peer-reviewed divulgation article	Sargassum, meeting the "enemy"	Daniel Robledo; Erika Vázquez Delfín	2	Academic sector	Centro de Investigación y de Estudios Avanzados (CINVESTAV) Mérida, IPN	An overview of the sargassum phenomenon in the Mexican Caribbean is presented.	NA	2019	NA	2019	NA	Origin and ecological importance	To provide a general overview of sargassum influxes to the Mexican Caribbean	Divulgation paper	Robledo, D; Vázquez-Delfín, E. 2019. Sargazo, conociendo al “enemigo”. Revista Avance y Perspectiva CINVESTAV. 5:3, 1-7	NA	0	0	0
1470	Thesis	Biogeografía de las grandes macroalgas en el Golfo de México y Caribe mexicano	Martha Isabel Vilchis Alfaro	1	Academic sector	Universidad Autónoma Metropolitana (UAM)	In this study, 118 species of large macroalgae in the Gulf of Mexico and the Mexican Caribbean, distributed in 139 locations, were recorded and characterized.	2013	2015	2	2015	Tamaulipas; Yucatán; Quintana Roo	Origin and ecological importance	To define the distribution areas of macroalgae in the Gulf of Mexico and the Mexican Caribbean	Ten areas with high species richness were identified. Based on various analyses, four conservation areas are proposed for macroalgae. The macroalgae, Eucheuma isiforme, Sargassum fluitans and Hydropuntia cornea are postulated as raw material for the manufacture of artisanal paper.	Vilchis-Alfaro, M. I. 2015. Biogeografía de las grandes macroalgas en el Golfo de México y Caribe mexicano. Mater Thesis. UAM Iztapalapa, Ciudad de México.	NA	0	0	0
1480	Apps	Observatorio Ciudadano Sargazo	Ehecatl Mendoza Galicia	1	Civil society	Viajefest	The Sargassum Citizen Observatory is updated with the participation of inhabitants, visitors and tourists, as well as businesses and locals of Quintana Roo, who share photographs on a daily basis. Data is also obtained from institutions such as: National Oceanic and Atmospheric Administration (NOAA), the Optical Oceanography Laboratory of the University of South Florida, CONABIO Marine Monitoring…	2018	To date	To date	2018	Cancún; Mayan Riviera	Monitoring, modeling and early warning	To have a real-time monitoring and reporting system for sargassum on the beaches of Cancun and the Riviera Maya, mainly for tourist information	Tourist information app with reports of the presence of sargassum in the main beaches of the region	NA	NA	0	0	0	Sargassum monitoring, Yobibyte Labs
1490	Apps	Crowdsourcing for sargassum monitoring along the beaches of Quintana Roo	Javier Arellano Verdejo; Hugo E. Lazcano Hernandez	2	Academic sector	El Colegio de la Frontera Sur (ECOSUR)	Increased human communication capabilities and declining costs of technology, have improved user access to smart mobile devices. Crowdsourcing has proven successful when information technology and collaborative solutions are combined to solve complex problems. This study demonstrates how crowdsourcing and the use of new technologies can be used to monitor sargassum on the beaches of Quintana Roo,…	2020	To date	To date	2020	Quintana Roo	Monitoring, modeling and early warning	To evaluate the usefulness of crowdsourcing as a useful sargassum monitoring method.	Crowdsourcing is useful in terms of sargassum monitoring. Reduces operational costs and allows to obtain real-time images of a large geographical area. The disadvantages and challenges of this method are the telecommunications infrastructure in the southeastern part of the country as well as the lack of app users who are willing to use it on a recurring basis.	Arellano-Verdejo, J., & Lazcano-Hernandez, H. E. 2020. Crowdsourcing for Sargassum Monitoring Along the Beaches in Quintana Roo. In GIS LATAM Conference (pp. 49-62). Springer, Cham.	USGS (Dependency abroad); ESA (Dependency abroad)	2	0	2	Collective View App (ERIS CHETUMAL)
1500	Article or presentation at scientific meeting or congress	Discriminación multi-índice de sargazo pelágico en el 2015 al noreste de la península de Yucatán	Abigail Uribe Martínez; María de los Ángeles Liceaga Correa; Eduardo Cuevas; Héctor Hernández Núñez; David Espinosa Puch	5	Academic sector	Centro de Investigación y de Estudios Avanzados (CINVESTAV) Mérida, IPN	The purpose of this study was to implement a methodological approach to detect sargassum in an efficient and replicable manner, at a moderate cost. Landsat 8 satellite images were analyzed, from which a classification was implemented based on several indices. This approach constitutes an alternative for the systematic detection of sargassum and allows a quantitative and semi-automatic comparison …	2014	2019	5	2019	Mérida	Monitoring, modeling and early warning	To expand the existing methodological approaches for the detection of sargassum and have a useful and low-cost tool that can be informative for decision makers.	A multi-index methodological framework for the systematic detection of sargassum was presented.	Uribe-Martínez Abigail, Liceaga-Correa María de los Ángeles, Cuevas Eduardo, Hernández-Núñez Héctor y Espinosa-Puch David. 2016. Discriminación multi-índice de sargazo pelágico en el 2015 al noreste de la península de Yucatán. Memorias del XIX Congreso Nacional de Oceanografía. Mexico city, September 2016.	CIGOM; University of Florida (Dependency abroad); Pronatura (Civil society); UNACAR	4	3	1
1510	Technical report	Caracterización y validación de propiedades inmunomoduladoras de una formulación mexicana de fucoidano, como potencial tratamiento alternativo para COVID-19	Luis Miguel Masiá Nebot	1	Private sector	Creamos Más	Fucoidano Alquimar is a food supplement based on fucoidan extracted from sargassum. We propose that Fucoidan Alquimar is an option for the treatment of COVID-19, since it has different biological properties.	2020	2021	1	2021	Quintana Roo	Potential uses	To evaluate fucoidan extracted from sargassum as a potential treatment against COVID-19.	The results demonstrate that PBMCs from SARS-CoV-2 patients and recovered subjects have lost mitochondrial membrane potential. When these cells were treated with fucoidan their mitochondrial membrane potential was restored and even enhanced relative to the mitochondrial membrane potential of PBMC from healthy subjects. It also increased the flow of calcium in PBMC of healthy subjects and those wi…	Masiá Nebot, L. 2021. Caracterización y validación de propiedades inmunomoduladoras de una formulación mexicana de fucoidano, como potencial tratamiento alternativo para COVID-19. CONACYT Funded Project. 9pp	Earth University (Dependency abroad); UQROO; CIATEJ; UAN	4	3	1		4991150
1520	Technical report	Valorización de la biomasa de arribazón del género Sargassum para su uso y aprovechamiento	Daniel Robledo	1	Academic sector	Centro de Investigación y de Estudios Avanzados (CINVESTAV) Mérida, IPN	This project studied the Sargassum genus that have caused massive accumulation on the coasts of the Yucatan Peninsula, with the goal of proposing and developing transformation, degradation or bioconversion processes based on their chemical composition. The results are presented in relation to the determination of species, morphology and chemo-taxonomy, characterization of aqueous and organic extr…	2017	2020	3	2020	Quintana Roo	Potential uses	To understand the origin and differences of the Sargassum species, based on morphological, genetic and molecular characters. To understand the seasonal chemical variation of compounds extracted from sargassum. To propose methods for its quantification, harvest, use and disposal.	The most abundant species found in this study were S. fluitans, followed by S. natans morphotype VIII. In addition, the presence of different species of hydrozoans on this morphotype suggests that its origin does not correspond to that of the pelagic species of the Sargasso Sea, and most likely comes from the west coast of Africa. A seasonality of the aqueous and organic extracts of sargassum exi…	Robledo-Ramirez, D et al. 2020. Valorización de la biomasa de arribazón del género Sargassum para su uso y aprovechamiento. CONACYT funded project. 35 pp.	Univeristy Stellenbosch Sudafrica (Dependency abroad); Universite Bretagne Sud (Dependency abroad); UBO-France (Dependency abroad); CIBNOR; ICML; Acadian Seaplants Canada (Dependency abroad); Algas Marinas, S.A. de C.V (Private sector); DuPont Nutrition & Biosciences (Dependency abroad)	8	3	5		3700620
1530	Peer-reviewed divulgation article	Seaweed resources of Mexico: current knowledge and future perspectives	Erika Vázquez Delfín, Yolanda Freile Pelegrín, Hugo Pliego Cortés; Daniel Robledo	2	Academic sector	Centro de Investigación y de Estudios Avanzados (CINVESTAV) Mérida, IPN	The use of marine algae as a resource in Mexico has been focused on the extraction of polysaccharides, fertilizers, raw material for animal feed, and the production of cosmetics. The main exploitation has occurred along the coast of the Baja California peninsula, based on few species. In recent years, the total volume of algae imports has increased over the export volume, which suggests a growing…	NA	2019	NA	2019	NA	Potential uses	To provide an update on the current state of knowledge about marine algae in Mexico as a resource, recognizing biodiversity, potential uses and possible applications in the country.	An overview of seaweed as a resource in Mexico and the potential steps to follow in the future to continue exploiting this resource, was presented.	Vázquez-Delfín, E., Freile-Pelegrín, Y., Pliego-Cortés, H., & Robledo, D. 2019. Seaweed resources of Mexico: current knowledge and future perspectives. Botanica Marina, 62(3): 275-289.	Instituto de Biología UNAM	1	1	0
1540	Peer-reviewed scientific article	NMR metabolic profiling of Sargassum species under different stabilization/extraction processes	Gloria Ivonne Hernández Bolio; Adrián Fagundo Mollineda; Edgar Emmanuel Caamal Fuentes; Daniel Robledo; Yolanda Freile Pelegrin; Emanuel Hernández Núñez	6	Academic sector	Centro de Investigación y de Estudios Avanzados (CINVESTAV) Mérida, IPN	It is important to determine sargassum species to identify metabolites and explore their use and improve management practices.	2017	2020	3	2020	Puerto Morelos	Potential uses	To study the metabolic differences between species of Sargassum as well as to evaluate some pre-treatment methods and extraction of metabolites	The species S. natans, S. natans (morphotype VIII), S. fluitans and S. buxifolium (benthic) were identified. A PCA analysis revealed that glutamine and glutamate have the greatest influence on benthic sargassum aggregation, while a high abundance of lactate, myo-inositol and trimethylamine was a unique feature of S. natans morphotype VIII. Drying by heat was shown to be the best process for metab…	Hernández‐Bolio, G. I., Fagundo‐Mollineda, A., Caamal‐Fuentes, E. E., Robledo, D., Freile‐Pelegrin, Y., & Hernández‐Núñez, E. 2020. NMR metabolic profiling of Sargassum species under different stabilization/extraction processes. Journal of Phycology.	NA	0	0	0
1550	Peer-reviewed scientific article	Antiviral and cytotoxic activities of polysaccharides extracted from four tropical seaweed species	Gilles Bedoux; Edgar Caamal-Fuentes; Romain Boulho; Christel Marty; Nathalie Bourgougnon; Yolanda Freile-Pelegrín; Daniel Robledo	7	Academic sector	Centro de Investigación y de Estudios Avanzados (CINVESTAV) Mérida, IPN	Polysaccharides extracted from Rhodymenia pseudopalmata, Solieria filiformis, Hydropuntia cornea (Rhodophyta), and Sargassum fluitans (Phaeophyceae) were evaluated for their cytotoxic and antiviral activities against Herpes simplex virus (HSV-Type 1).	2015	2017	2	2017	Playa del Carmen	Potential uses	To evaluate the antiviral activities of polysaccharides extracted from tropical algae against the HSV-1 virus.	Polysaccharides from Sargassum fluitans and Solieria filiformis showed antiviral activity against herpes simplex virus type I in vitro with a multiplicity of infection (MOI) of 0.01 ID50/cell with no cytotoxicity (1–200 μg/mL). These polysaccharides could be studied further to assess their potential use as an antiviral drug.	Bedoux, G., Caamal-Fuentes, E., Boulho, R., Marty, C., Bourgougnon, N., Freile-Pelegrín, Y., & Robledo, D. 2017. Antiviral and cytotoxic activities of polysaccharides extracted from four tropical seaweed species. Natural Product Communications. 12 (6): 807- 811	Laboratoire de Biotechnologie et Chimie Marines (Dependency abroad)	1	0	1
1560	Technical report	Sargazo 2019: Efectos en el Caribe.	Roberto Solano; Brian Rodríguez	2	Private sector	Grupo Financiero Monex	Taking into account the relevance of sargassum influxes in the Caribbean, we evaluated several indicators to understand the effects on tourim of the region	NA	2019	NA	2019	NA	Socioeconomic and environmental impacts	To evaluate the impact of sargassum on tourism	Tourists maintained interest in traveling to Mexican destinations despite sargassum.	Solano, R & Rodríguez, B. 2019. Sargazo 2019: Efectos en el Caribe. Documento de trabajo de la Dirección de Análisis y Estrategia Bursátil de Monex. 5 pp.	NA	0	0	0
1570	Media news (on projects)	Sargazo ha impactado negativamente en el turismo del Caribe mexicano	Conrad Bergwerf	1	Private sector	Asociación de Hoteles de la Riviera Maya (AHRM)	In the first five months of 2019, a negative impact on tourism was observed with 6 percent less occupancy in the area compared to the same period in 2018	NA	2020	NA	2020	NA	Socioeconomic and environmental impacts	To analyze the impact of sargassum on tourism	Statistics report	NA	NA	0	0	0	https://www.portalambiental.com.mx/print/1286
1580	Description of funded projects	Estudio de la variación espacio temporal de fucoidano a partir de Sargassum sp	Luis Miguel Masiá Nebot	1	Private sector	Creamos Más	This project seeks to take advantage of Sargassum sp that reaches the coast of the Mexican Caribbean, through the extraction of fucoidan, a sulfated polysaccharide found in the cell wall of brown algae. To do this, it is proposed to conduct a field work sampling during two seasons (dry and rainy) and to extract fucoidan by mixed methods.	2019	To date	2	2021	Quintana Roo	Potential uses	To develop a process for the sustainable extraction of fucoidan, based on the study and structural characterization of sulfated polysaccharides from Sargassum sp.	There are significant differences in the fucoidan extraction treatments, obtaining yields of 0.3% to 2.78%.	NA	NA	0	0	0		3409038
1590	Description of funded projects	Innovación tecnológica para valorizar la recolección masiva del sargazo de la Rivera Maya para insumo farmacéutico e industrial de alto valor	Jorge Joaquín Canto Ibáñez	1	Academic sector	Universidad Politécnica de Quintana Roo (UPQROO)	The goal of this project is to develop tools that give certainty to governmental and non-governmental organizations, as well as private companies, about sargassum influxes forecast. Technological packages will also be developed for the use of sargassum to demonstrate economic viability.	2019	To date	2	2021	Quintana Roo	Potential uses	To develop remote sensing techniques and quantitative estimation of sargassum. To develop numerical models for an early warning system. To implement and optimize a process for obtaining alginate and fucoidan from sargassum. To develop and implement a production process for biodegradable surfactants from sargassum. To develop technological packages and economic feasibility studies to promote inves…	First stage completed	NA	Corrosión y protección SA de CV	1	1	0		1.59331e+07
1600	Description of funded projects	Diseño de un proceso integral y sostenible para la cosecha, manejo y aprovechamiento del sargazo en las costas de Quintana Roo	Silvia Carrillo Domínguez	1	Academic sector	Centro de Investigación y Asistencia Técnica del Estado de Querétaro, A.C (CIATEQ)	This project will analyze the problem of sargassum in a multidisciplinary and comprehensive manner, via the model of the quintuple helix and the development the innovation processes.	2019	2021	2	2021	Quintana Roo	Potential uses	To mitigate the environmental, economic and social impact of the atypical influxes of sargassum on the coast of Quintana Roo, through the design of comprehensive strategies and technology development.	NA	NA	CICIMAR; INCMNSZ; CIBNOR; CICESE; CINVESTAV; UABC	6	6	0		7000000
1610	Media news (on projects)	Producción de biogás a partir del tratamiento de sargazo	Arturo Peña Tapia; Miguel Ángel Aké Madera; Rogelio Sosa López	3	Private sector	Nopalimex	It is intended to use biotechnology and the anaerobic engineering process for the production of biogas from sargassum.	2019	To date	To date	2021	Tulum	Potential uses	To produce biogas and electricity from organic materials such as nopal and sargassum, which will reduce greenhouse gases, make energy consumption more efficient, optimize financial resources and reduce environmental pollution.	NA	NA	IPN; TecNM	2	2	0	https://heraldodemexico.com.mx/nacional/2019/10/29/exploran-biouso-del-sargazo-128535.html		1
1620	Article or presentation at scientific meeting or congress	Seasonal changes in arsenic, heavy metals and trace element concentration in pelagic species of sargassum from the Mexican Caribbean	Paulina Annette Ortega Flores	1	Academic sector	Centro de Investigaciones Biológicas del Noroeste S.C (CIBNOR)	In this study, the concentrations of arsenic (As), cadmium (Cd) and lead (Pb), copper (Cu), iron (Fe) and zinc (Zn) in pelagic sargassum species collected along the coast were evaluated.	2018	To date	3	2021	Mexican caribbean	Potential uses	To determine the amount of heavy metals and other trace elements in different morphotypes of sargassum, taking into account seasonal variation.	The presence of As was detected in 100% of the samples. The maximum concentrations obtained were: As 255.20 mg kg-1, Cd 3.11 mg kg-1, Pb 20.70 mg kg-1, Cu 6.44 mg kg-1, Fe 78.27 mg kg-1 and 62.84 mg kg-1 for Zn. The morphotype S. natans VIII showed the highest concentration of As (102.74 mg kg-1). Statistically significant differences (p <0.05) were found between seasons (warm and dry, rainy and …	Ortega-Flores, P. 2021. Seasonal changes in arsenic, heavy metals and trace element concentration in pelagic species of sargassum from the Mexican Caribbean. 12th Dependency abroad Phycological Congress. Marzo 2021. Chile.	CINVESTAV	1	1	0
1630	Peer-reviewed divulgation article	A Natural History of Floating Sargassum Species (Sargasso) from Mexico	José Luis Godínez Ortega; Juan V. Cuatlán Cortés; Juan M. López Bautista; Brigitta I. van Tussenbroek	4	Academic sector	Instituto de Biología, UNAM	This chapter deals with the historical aspects of the pelagic sargassum that reaches the Mexican coast, its taxonomic and morphological characteristics, distribution, ecology and practical uses.	NA	2021	NA	2021	Mexican caribbean	Origin and ecological importance	To provide an overview of the global phenomenon of pelagic sargassum from a comprehensive perspective that includes natural history, modern biology, as well as social and economic aspects.	Main characteristics associated with the phenomenon are described	Godínez-Ortega, J. L., Cuatlán-Cortés, J. V., López-Bautista, J. M., & van Tussenbroek, B. I. 2021. A Natural History of Floating Sargassum Species (Sargasso) from Mexico. In Natural History and Ecology of Mexico and Central America. IntechOpen. DOI: 10.5772/intechopen.97230	ICML; University of Alabama (Dependency abroad)	2	1	1
1640	Description of funded projects	Sargazo. Agencia vegetal, cambio climático y precariedad en el caribe mexicano (Puerto Morelos, Quintana Roo)	Marcia Leticia Durand Smith	1	Academic sector	Centro Regional de Investigaciones Multidisciplinarias, UNAM	NA	2019	To date	2	2021	NA	Socioeconomic and environmental impacts	NA	NA	NA	NA	0	0	0
1650	Peer-reviewed divulgation article	El sargazo y nosotros	Maria Leticia Durand; Juanita Sundberg	2	Academic sector	Centro Regional de Investigaciones Multidisciplinarias, UNAM	An overview of the sargassum phenomenon in the Mexican Caribbean is provided.	2019	2020	1	2020	NA	Socioeconomic and environmental impacts	To provide a general review of the sargassum phenomenon in Mexico	Main characteristics associated with the phenomenon are described	Durand, L. & J. Sundberg. 2020. El Sargazo y Nosotros. Nexos.	Departamento de Geografía, Universidad de British Columbia Vancouver (Dependency abroad)	1	0	1
1660	Description of funded projects	Aprovechamiento del sargazo mediante la digestión anaerobia y la producción de biogás	Adalberto Noyola Robles	1	Academic sector	Instituto de Ingeniería, UNAM	The sargassum problem can be addressed by using a biological process that recovers energy from organic waste.	2021	To date	2	2021	NA	Potential uses	To establish the methane yield and the main process variables that would allow the scaling up of the hydrolysis process - methanogenesis- of sargassum.	NA	NA	NA	0	0	0
1670	Media news (on projects)	Pirolisis hidrotermal del sargazo	Luis Álvarez de Icaza Longoria	1	Academic sector	Instituto de Ingeniería, UNAM	The carbonization of sargassum biomass through the process called hydrothermal pyrolysis is suggested. The resulting biocarbon can be used to improve soils or as biofuel, etc.	2018	To date	NA	2019	NA	Potential uses	NA	NA	NA	NA	0	0	0	https://quintafuerza.mx/quintana-roo/descubre-el-metodo-cientifico-anti-sargazo-que-podria-aplicarse-en-todas-las-costas-del-pais/?fb_comment_id=1711901728858835_1712086425507032
1680	Description of funded projects	Medición de calidad del aire y gases generados por la descomposición del sargazo en la zona del Caribe mexicano	Telma Castro; Oscar Peralta; José Adán Caballero Vázquez; Gilberto Acosta González	4	Academic sector	Centro de Ciencias de la Atmósfera, UNAM	It is proposed to measure environmental concentrations of hydrogen sulfide (H2S), methane (CH4) and ammonia (NH3) derived from the degradation of sargassum in strategic sites in the Mexican Caribbean to compare the concentrations with the permissible or recommended limits.	2021	To date	3	2024	Cancún; Puerto Morelos; Akumal; Mahahual	Socioeconomic and environmental impacts	To evaluate the potential health and environmental risks due to concentrations of H2S, NH3 and CH4 derived from the decomposition of sargassum in inhabited areas.	NA	NA	CICY	1	1	0
1690	Peer-reviewed divulgation article	Arribazones de sargazo en el Caribe: Interacción humano-medioambiente	Julia Fraga; Daniel Robledo; Laura Hernández; Florence Ménez	4	Academic sector	Centro de Investigación y de Estudios Avanzados (CINVESTAV) Mérida, IPN	Massive arrivals of sargassum are examined as a disturbance of nature that harms living conditions, as well as the economy, health and politics.	2019	2019	1	2019	NA	Socioeconomic and environmental impacts	To examine massive Sargassum influxes as a natural disturbance	Divulgation paper	Fraga et al., 2019. Arribazones de sargazo en el Caribe: Interacción humano-medioambiente. Avance y Perspectiva CINVESTAV.	NA	0	0	0
1700	Description of funded projects	Percepción social y economía institucional de las arribazones de Sargassum en las costas de la Península de Yucatán	Julia Fraga	1	Academic sector	Centro de Investigación y de Estudios Avanzados (CINVESTAV) Mérida, IPN	NA	2018	2019	1	2019	NA	Socioeconomic and environmental impacts	NA	NA	NA	NA	0	0	0		179428
1710	Description of funded projects	Búsqueda de la posible utilidad terapéutica de algunas especies de Sargassum spp que forman el sargazo del Caribe mexicano	Emanuel Hernández Núñez	1	Academic sector	Centro de Investigación y de Estudios Avanzados (CINVESTAV) Mérida, IPN	NA	2019	2019	1	2020	NA	Potential uses	NA	NA	NA	NA	0	0	0
1720	Website	Monitoreo del sargazo en el Laboratorio Nacional de Observación de la Tierra (LANOT)	Gabriela Gómez Rodríguez; Raúl Aguirre Gómez	2	Academic sector	Universidad Nacional Autónoma de México (UNAM)	At LANOT, sargassum rafts are monitored through satellite images from Sentinel 2 to carry out historical and prediction analyses.	2018	To date	To date	2021	Mexican caribbean	Monitoring, modeling and early warning	To monitor Sargassum and develop an early warning system.	Incipient monitoring system	NA	NA	0	0	0
1730	Technical report	Pronóstico de arribazones de sargazo en las costas de Quintana Roo	Jaime González Cano; Francisco Arreguín Sánchez	2	Government sector	Instituto Nacional de Pesca (INAPESCA)	Data of monthly biomasses of sargassum, estimated and reported by the USF and NASA, are analyzed to describe population growth.	2018	2022	3	2021	Mexican caribbean	Monitoring, modeling and early warning	To understand population dynamics of sagassum	2021 forecast is provided.	González-Cano, J.M & Arreguín-Sánchez, F. 2021. Pronóstico de la biomasa de sargazo en el año 2021 en una porción de la zona del Atlántico centro occidental. INAPESCA.	CICIMAR	1	1	0
1740	Peer-reviewed scientific article	Evolution of the riverine nutrient export to the Tropical Atlantic over the last 15 years: is there a link with Sargassum proliferation?	Julien Jouanno; Jean-Sébastien Moquet; Léo Berline; Marie-Hélène Radenac; William Santini; Thomas Changeux; Thierry Thibaut; Witold Podlejski; Frédéric Ménard; Jean-Michel Martinez; Olivier Aumont; Julio Sheinbaum; Naziano Filizola; Guy Dieudonne Moukandi N'Kaya	14	Academic sector	Centro de Investigación Científica y de Educación Superior de Ensenada (CICESE)	It has been suggested that the proliferation of sargassum in the last decade is due to an increase in nutrient inputs from tropical rivers, climate change, increased urbanization, and overexploitation of resources. Here we discuss whether changes in nutrient inputs from rivers could contribute to the proliferation of Sargassum in recent years or whether it drives its seasonal cycle.	2019	2021	2	2021	NA	Origin and ecological importance	To determine the importance of the amount of nutrients by the main rivers for the massive growth of sargassum in recent years.	No clear evidence was found that nutrient flows may have increased in the last 15 years, so it is inferred that hydrological changes are not the primary drivers of Sargassum proliferation.	Jouanno, J., Moquet, J.S., Berline, L., Radenac, M.H., Santini, W., Changeux, T., Thibaut, T., Podlejski, W., Ménard, F., Martinez, J.M. and Aumont, O. 2021. Evolution of the riverine nutrient export to the Tropical Atlantic over the last 15 years: is there a link with Sargassum proliferation?. Environmental Research Letters, 16(3): 034042.	Université de Toulouse (Dependency abroad); Laboratoire d’Océanographie et de Climatologie (Dependency abroad); Amazonas State Federal University (Dependency abroad); Marien N’gouabi University (Dependency abroad)	4	0	4
1750	Website	FORESEA: Seasonal Forecast of Sargassum Events in the Atlantic	Julio Sheinbaum	1	Academic sector	Centro de Investigación Científica y de Educación Superior de Ensenada (CICESE)	The purpose of the FORESEA research is to advance our current understanding of the origin and drift of Sargassum in the open ocean and coastal systems and to develop a forecast system.	2020	2022	2	2022	NA	Monitoring, modeling and early warning	To advance our current understanding of the origin and drift of Sargassum in the open ocean and coasts and to translate this knowledge into a seasonal forecast of Sargassum.	NA		Varias organizaciones Dependency abroades	16	0	16	https://sargassum-foresea.cnrs.fr/
1760	Website	Semáforo de sargazo	Efraín Villanueva Arcos; Contralmirante Alejandro López Zenteno	2	Government sector	Secretaría de Ecología y Medio Ambiente (SEMA)	Here it is presented a traffic light approach of the distribution and abundance of sargassum on the beaches of the Mexican Caribbean	2021	To date	NA	2021	NA	Monitoring, modeling and early warning	To characterize the distribution of sargassum on Mexican beaches	Traffic light system		SEMA	1	1	0	https://qroo.gob.mx/sema/comunicado-de-presencia-de-sargazo-en-playas-en-el-estado-de-quintana-roo
1770	Website	Flows: Everything is connected (documentary)	Klaus Thy­mann	1	Civil society	Fundación Lighthouse para los mares y oceános	The purpose of this documentary is to show that ecosystems cannot be seen as isolated pieces of nature, everything is connected.	NA	2021	NA	2021	NA	communication and education	To provide a global overview of the phenomenon	Documentary		Reserva de la biósfera de Sian Ka'an (Civil society); Reserva de la biósfera del Caribe Mexicano (Civil society); ICML	3	3	0	https://m.facebook.com/events/1163209590813241
1780	Peer-reviewed scientific article	Collective view: Mapping the distribution of sargassum along the beaches of the Mexican Caribbean	Javier Arellano Verdejo​; Hugo E. Lazcano Hernández​	2	Academic sector	El Colegio de la Frontera Sur (ECOSUR)	This study proposes an innovative approach to monitoring Sargassum on beaches of Quintana Roo, using Crowdsourcing for image collection, deep learning for automatic classification, and information systems to visualize the results.	2019	2021	2	2021	Yucatán	Monitoring, modeling and early warning	To develop a collaborative scheme based on crowdsourcing for capturing images, artificial intelligence algorithms for automatic classification of photographs, and geographic information systems to display the results.	This study provides a first approach to mapping the distribution of Sargassum along the beach using classified and geotagged images and offers a new perspective on how the arrival of sargassum along the coast can be accurately mapped.	Arellano-Verdejo, J. and Lazcano-Hernández, H.E., 2021. Collective view: mapping Sargassum distribution along beaches of the Mexican Caribbean. PeerJ Computer Science, 7: e528.	NA	0	0	0
1800	Article or presentation at scientific meeting or congress	Acciones para la Atención del Arribo Masivo del Sargazo en Aguas Mexicanas	Contralmirante Alejandro López Zenteno	1	Government sector	Secretaría de la Marina (SEMAR)	Since 2018, SEMAR has been responsible for the containment of sargassum on the coasts of the Mexican Caribbean. In recent years they have deployed ships that have helped to contain and harvest macroalgae in high seas. SEMAR also uses the satellite products of the University of Florida and an algorithm of its own creation to monitoring sargassum.	2018	To date	NA	2018	Mexican caribbean	Containment, harvest and disposal	To conduct the Federal strategy for the attention of the sargassum problem	Containment strategies	Seminario-Taller Nacional sobre teledetección, monitoreo, pronóstico y alerta temprana del sargazo pelágico que arriba a las costas mexicanas: Descubriendo sinergias y construyendo puentes hacia un sistema integral y regional. CONACYT, 2021. Webinar.	NA	0	0	0
1810	Website	Bioestimulantes y fertilizantes a base de sargazo	Manuel Ricardez	1	Private sector	C-combinator	Our process turns sargassum into materials that restore soils and oceans and contribute to lower carbon emissions.	2020	To date	NA	2021	Mexican caribbean	Potential uses	To produce biofertilizers based on sargassum	Product commercialization	NA	NA	0	0	0	https://www.c-combinator.com/
1820	Article or presentation at scientific meeting or congress	Caracterización lagrangiana de la ruta del sargazo mediante una comparación climatológica de las estructuras coherentes lagrangianas y los mapas auto-organizado	María Eugenia Allende	1	Academic sector	Unidad Académica Sisal, UNAM	Using new statistical methodologies and Lagrangian simulations, this research seeks to contribute with key elements to establish an early warning system that helps decision making.	NA	To date	NA	2021	NA	Monitoring, modeling and early warning	To understand the displacement of the great rafts of sargassum from the Atlantic to the Caribbean Sea, as well as determine the importance of the wind during its trajectory.	Preliminary results show that Lagrangian Coherent Structures form natural transport barriers that determine the amount of sargassum that reach the coast. The forcing of the wind is decisive for a significant accumulation of particles east coast of the Yucatan Peninsula.	Allende Arandía, M.E. 2021. Seminario Interinstitucional de Oceanografía Física de la RIOF. Webinar.	NA	0	0	0	https://www.youtube.com/watch?v=6ZnAR7byltM
1830	Media news (on projects)	Sargazotón	Francisco Reyes	1	Civil society	Club de Playa, San Martín Beach	Civil society is called to clean beaches in exchange for drinks and food	2021	NA	NA	2021	Cozumel	Containment, harvest and disposal	To encourage citizen participation for beach cleaning	Social activity	NA	NA	0	0	0
1840	Peer-reviewed scientific article	Species composition and chemical characterization of Sargassum influx at six different locations along the Mexican Caribbean coast	Erika Vázquez Delfín; Yolanda Freile Pelegrín; Adán Salazar Garibay; Elisa Serviere Zaragoza; Lia C. Méndez Rodríguez; Daniel Robledo	6	Academic sector	Centro de Investigación y de Estudios Avanzados (CINVESTAV) Mérida, IPN	Sargassum was characterized in terms of its abundance, species composition, and chemical content, using a combination of in situ sampling and remote sensing. This study represents reference information for the region that can help to define appropriate management and exploitation strategies.	2018	2021	3	2021	Quintana Roo	Origin and ecological importance	To generate information on the spatial characterization of Sargassum biomass on the beaches of the Mexican Caribbean.	A significant spatial variation in abundance and species composition was found in the six beach locations. This variation was related to local environmental conditions. The biochemical composition of sargassum was spatially homogeneous for most of the analyzed components, with the exception of carbon content, heavy metals (particularly Fe and As) and isotopic composition, which changed spatially.	Vázquez-Delfín, E., Freile-Pelegrín, Y., Salazar-Garibay, A., Serviere-Zaragoza, E., Méndez-Rodríguez, L.C. and Robledo, D. 2021. Species composition and chemical characterization of Sargassum influx at six different locations along the Mexican Caribbean coast. Science of The Total Environment, 795: 148852.	CentroGeo; IPN	2	2	0
1850	Technical report	Diagnóstico de las condiciones atmosféricas asociadas al arribo de sargazo a costas de Quintana Roo	José Antonio Salinas; María Eugenia Maya Magaña; Constantina Hernández Martínez	3	Academic sector	Instituto Mexicano de Tecnología del Agua (IMTA)	This paper presents a diagnosis of the seasonal, annual and interannual variability of atmospheric circulations in the Atlantic and Caribbean, identifying the atmospheric conditions under which sargassum arrives on the coast of Quintana Roo.	NA	2019	NA	2019	NA	Monitoring, modeling and early warning	To estimate, analyze and describe the space-time variability of the surface atmospheric circulation over the Atlantic Ocean and its effects on the massive influx of sargassum on the coast of Quintana Roo.	The results show that the atmospheric conditions for transporting sargassum to the coast of Quintana Roo are more favorable in summer than in winter. Additionally the highest extremes (90th percentile) in the Caribbean favor the transport of sargassum both in winter and in summer. However, the "connectivity" with other regions (Central Atlantic) makes summer more favorable, but winter potentially…	Salinas et al., 2019. Proyecto de Investigación Interno del IMTA. Diagnóstico de las condiciones atmosféricas asociadas al arribo de sargazo a costas de Quintana Roo. IMTA.	NA	0	0	0
1860	Article or presentation at scientific meeting or congress	Dinámica de transporte de sargazo pelágico en las cercanías del Caribe mexicano: análisis de sensibilidad	Jorge Zavala Hidalgo; Julio Lara Hernández	2	Academic sector	Centro de Ciencias de la Atmósfera, UNAM	This ongoing research aims to understand the dynamics of sargassum transport in the Mexican Caribbean through numerical modeling and in situ observations.	NA	To date	NA	2022	Mexican caribbean	Monitoring, modeling and early warning	To describe the dynamics of sargassum transport through numerical modeling and in situ observations, to support mitigation and management measures for these massive influxes.	The depth of sargassum rafts affects the area and speed of drift, since it modulates wind drag and the influence depth of currents. Wind drag is particularly important in determining sargassum strandings.	Seminario-Taller Nacional sobre teledetección, monitoreo, pronóstico y alerta temprana del sargazo pelágico que arriba a las costas mexicanas: Descubriendo sinergias y construyendo puentes hacia un sistema integral y regional. CONACYT, 2021. Webinar	NA	0	0	0
1870	Peer-reviewed scientific article	Seasonal characterization and quantification of biomolecules from sargassum collected from Mexican Caribbean coast–A preliminary study as a step forward to blue economy	Sara Saldarriaga Hernandez; Elda M. Melchor Martínez; Danay Carrillo Nieves; Roberto Parra Saldívar; Hafz M.N. Iqbal	5	Academic sector	Tecnológico de Monterrey	This study conducted a biochemical and elemental characterization of sargassum and analyzed the effect of season (dry and wet), sample location (from the beach to shallow water), and extraction method (microwave-assisted extraction and enzyme-assisted extraction).	2019	2021	2	2021	Cozumel	Potential uses	To characterize sargassum to understand its biotechnological potential, contributing to sustainability challenges in the region by minimizing waste.	The composition of the sargassum biomass revealed a moisture content of 5 to 7%, 24 to 31% ash content, 2.6–3.8% lipids content, 1.8–7.0% carbohydrates content, 3–11% proteins content, 1.5– 2.31 mgGAg of phenolic compounds, 2.7–2.9 kcal g − 1 calorific value, and metals such as As (30–146.3 ppm), Fe (16.5–45 ppm), P (197–472 ppm ). The most influential factor on the composition content of sargass…	Saldarriaga-Hernandez, S., Melchor-Martínez, E.M., Carrillo-Nieves, D., Parra-Saldívar, R. and Iqbal, H.M. 2021. Seasonal characterization and quantification of biomolecules from sargassum collected from Mexican Caribbean coast–A preliminary study as a step forward to blue economy. Journal of Environmental Management, 298: 113507.	NA	0	0	0
1880	Article or presentation at scientific meeting or congress	Transport dynamics of pelagic sargassum in the Mexican Caribbean: sensitivity studies to the wind and depth of the transporting ocean layer	Julio Antonio Lara Hernández; Cecilia Enríquez Ortiz; Jorge Zavala Hidalgo; Abigail Uribe Martínez; Eduardo Cuevas Flores	5	Academic sector	Instituto de Ciencias del Mar y Limnología (ICML), UNAM	Using a particle tracking model coupled with various types of wind and ocean current data, the trajectory of pelagic sargassum in the Mexican Caribbean during August 2018, September 2018 and April 2019, was analyzed.	NA	2021	NA	2021	NA	Monitoring, modeling and early warning	To determine the most relevant variables for the stranding of sargassum.	The magnitude of the wind represented the greatest impact on the amount of particles that entered the Mexican Caribbean. Layer depth from ocean currents was also important in the results: particle stranding was higher when only surface currents were used. In general, virtual particles located closer to shore and further south in the Mexican Caribbean showed the highest probability of stranding on…	Lara-Hernández, J. A., Enríquez-Ortiz, C., Zavala-Hidalgo, J., Uribe-Martínez, A., and Cuevas-Flores, E. 2021. Transport dynamics of pelagic sargassum in the Mexican Caribbean: sensitivity studies to the wind and depth of the transporting ocean layer. EGU General Assembly online, Apr 2021, EGU21-3688, https://doi.org/10.5194/egusphere-egu21-3688, 2021.	UNACAR	1	1	0
1890	Peer-reviewed scientific article	Green synthesis of Pt nanoparticles and their application in the oxygen reduction reaction	D. Rosas Medellín; K. Y. Pérez Salcedo; D Morales Acosta; F. J. Rodríguez Varela; B. Escobar	5	Academic sector	Centro de Investigación Científica de Yucatán (CICY)	The green synthesis of platinum nanoparticles (PtNP) was achieved using an aqueous extract with sagassum. Subsequently, these particles were placed on a carbon surface of natural origin (also with a sargassum extract) and was used as an electrocatalyst for the oxygen reduction reaction (ORR). PtNPs placed on a carbon surface with Sargassum sp. improves ORR kinetics compared to a commercial carbon…	NA	2021	NA	2021	NA	Potential uses	To develop a green synthesis of platinum nanoparticles (PtNP) from a sargassum extract and measure the electrocatalyst capacity of a sargassum-based carbon surface.	PtNPs placed on a sargasum-based carbon improves ORR kinetics compared to a commercial carbon surface.	Rosas-Medellín, D., Pérez-Salcedo, K.Y., Morales-Acosta, D. et al. 2021. Green synthesis of Pt nanoparticles and their application in the oxygen reduction reaction. Journal of Materials Research. https://doi.org/10.1557/s43578-021-00281-8	Centro de Investigación en Química Aplicada; Cinvestav-Saltillo	2	2	0
1900	Peer-reviewed scientific article	A NEMO-based model of Sargassum distribution in the Tropical Atlantic: description of the model and sensitivity analysis (NEMO-Sarg1. 0)	Julien Jouanno; Rachid Benshila; Léo Berline; Antonin Soulié; Marie Hélène Radenac; Guillaume Morvan; Frédéric Diaz; Julio Sheinbaum; Cristele Chevalier; Thierry Thibaut; Thomas Changeux; Frédéric Menard; Sarah Berthet; Olivier Aumont; Christian Ethé; Pierre Nabat; Marc Mallet	17	Academic sector	Centro de Investigación Científica y de Educación Superior de Ensenada (CICESE)	It is essential to clarify the link between Sargassum distribution and environmental conditions as well as to lay the groundwork for a seasonal forecast at the scale of the tropical Atlantic basin. We developed a modeling framework based on NEMO, an ocean model that integrates current and wave transport, and the physiology of Sargassum. The model is initialized from satellite observations. Model …	2019	2021	2	2021	NA	Monitoring, modeling and early warning	To develop a numerical model that represents the distribution of pelagic sargassum.	The results demonstrate the ability of the model to reproduce and predict the seasonal cycle and large-scale distribution of the sargassum biome.	Jouanno, J., Benshila, R., Berline, L., Soulié, A., Radenac, M.H., Morvan, G., Diaz, F., Sheinbaum, J., Chevalier, C., Thibaut, T. and Changeux, T. 2021. A NEMO-based model of Sargassum distribution in the Tropical Atlantic: description of the model and sensitivity analysis (NEMO-Sarg1. 0). Geoscientific Model Development, 14(6): 4069-4086.	Université de Toulouse (Dependency abroad); Université de Toulon (Dependency abroad); LOCEAN IRD-IPSL (Dependency abroad); ANR (Dependency abroad)	4	0	4
1910	Peer-reviewed scientific article	High-pressure technology for Sargassum spp biomass pretreatment and fractionation in the third generation of bioethanol production	E. Aparicio; Rosa M. Rodríguez Jasso; Cesar D. Pinales Marquez; Araceli Loredo Trevino; Armando Robledo Olivo; Cristobal N. Aguilar; Emily T. Kostas; Hector A. Ruiz	8	Academic sector	Universidad Autónoma de Coahuila (UAdeC)	Sargassum biomass was subjected to high pressure technology for fractionation to obtain pretreated solids enriched in glucan. A saccharification and fermentation (PSSF) strategy was carried out to produce bioethanol. This process highlights the feasibility of bioethanol production from macroalgae biomass.	2019	2021	2	2021	Puerto Morelos	Potential uses	To study sargassum for the production of bioethanol, using a high pressure technology (hydrothermal processing).	Sargassum is a competitive raw material to produce biofuels such as bioethanol under a biorefinery and bioeconomy concept.	Aparicio, E., Rodríguez-Jasso, R.M., Pinales-Márquez, C.D., Loredo-Treviño, A., Robledo-Olivo, A., Aguilar, C.N., Kostas, E.T. and Ruiz, H.A., 2021. High-pressure technology for Sargassum spp biomass pretreatment and fractionation in the third generation of bioethanol production. Bioresource Technology, 329: 124935.	Universidad Autonoma Agraria Antonio Narro; University College London (Dependency abroad)	2	1	1
1920	Peer-reviewed scientific article	Sargassum Influx on the Mexican Coast: A Source for Synthesizing Silver Nanoparticles with Catalytic and Antibacterial Properties.	Jose Luis López Miranda; Rodrigo Esparza; Marlen Alexis González Reyna; Beatriz Liliana España Sánchez; Angel Ramon Hernandez Martinez; Rodolfo Silva; Miriam Estévez	7	Academic sector	Centro de Física Aplicada y Tecnología Avanzada (CFATA), UNAM	This work reports the synthesis of silver nanoparticles (AgNPs-S) using extracts from Sargassum and explores their antibacterial and catalytic potential.	NA	2021	NA	2021	Mexican caribbean	Potential uses	To explore sargassum as precursor for the green synthesis of silver nanoparticles and their evaluation as catalytic and antibacterial material.	AgNPs-S synthesized from sargassum were found to have significantly higher catalytic activity for the degradation of methylene blue and more effective antibacterial activity against Staphylococcus aureus and Pseudomonas aeruginosa than nanoparticles obtained by chemical synthesis without sargassum.	López-Miranda, J.L.; Esparza, R.; González-Reyna, M.A.; España-Sánchez, B.L.; Hernandez_x0002_Martinez, A.R.; Silva, R.; Estévez, M. 2021. Sargassum Influx on the Mexican Coast: A Source for Synthesizing Silver Nanoparticles with Catalytic and Antibacterial Properties. Appl. Sci. 11: 4638. https://doi.org/10.3390/app11104638	CEMIE-Océano; Centro de Investigación y Desarrollo Tecnológico en Electroquímica SC; Instituto de Ingeniería, UNAM	3	3	0
1930	Peer-reviewed divulgation article	Challenges of Turning the Sargassum Crisis into Gold: Current Constraints and Implications for the Caribbean	Hazel A. Oxenford; Shelly Ann Cox; Brigitta I. van Tussenbroek; Anne Desrochers	4	Academic sector	Instituto de Ciencias del Mar y Limnología (ICML), UNAM	In this study we use a multi-method approach to learn from stakeholders (researchers, entrepreneurs) about the constraints and challenges they face to exploit and use sargassum as a resource. These can be grouped into five broad categories: (1) unpredictable supply of sargassum; (2) issues related to the chemical composition of seaweeds; (3) harvest, transport and storage; (4) governance; and (5)…	NA	2021	NA	2021	Mexican caribbean	Potential uses	To examine and better understand the nature and extent of the limitations that exist to using sargassum as a raw material.	This work documents the limitations and challenges for a more detailed consideration of specific problems and possible solutions regarding the use of sargassum. It is recommended that the proposed solutions and actions be integrated into a regional strategic framework.	Oxenford, H.A.; Cox, S.-A.; van Tussenbroek, B.I.; Desrochers, A. 2021 Challenges of Turning the Sargassum Crisis into Gold: Current Constraints and Implications for the Caribbean. Phycology 2021, 1: 27–48. https://doi.org/10.3390/phycology1010003	Global Environment Facility (GEF) (Dependency abroad); University of the West Indies (Dependency abroad)	2	0	2
1940	Article or presentation at scientific meeting or congress	Electron Microscopy Characterization of Sargassum Spp. from the Mexican Caribbean for Application as a Bioconstruction Material.	Luis Bernardo López Sosa; Mario Morales Máximo; Rogelio Anastacio-Paulino; Abraham Custodio Hernández; Juan Carlos Corral Huacuz; Arturo AguileraMand	6	Academic sector	Universidad Intercultural Indígena de Michoacán	The thermal conductivity of Sargassum spp. is low, so it can be used as a bio-construction material for conventional homes to increase energy efficiency in these constructions. The characterization of Sargassum spp. using scanning electron microscopy is conducted to justify its use as a bio-construction material for houses.	NA	2021	NA	2021	Cancún	Potential uses	To justify the use of sargassum as bioconstruction material	Characterization by scanning electron microscopy showed the presence of some elements associated with calcite-type compounds, which are used for the manufacture of cement. In addition, the high content of fibrous organic matter provides good thermal properties.	López-Sosa, L., Morales-Máximo, M., Anastacio-Paulino, R., Custodio-Hernández, A., Corral-Huacuz, J., & Aguilera-Mandujano, A. 2021. Electron Microscopy Characterization of Sargassum Spp. from the Mexican Caribbean for Application as a Bioconstruction Material. Microscopy and Microanalysis, 27(S1): 3140-3143. doi:10.1017/S1431927621010874	UVAQ; UMSNH	2	2	0
1950	Description of funded projects	Obtención y fabricación de carbón activado a partir de residuos de Sargasum sp.	Jessica Borbolla Vazquez	1	Academic sector	Universidad Politécnica de Quintana Roo (UPQROO)	This project is focused on obtaining activated carbon from Sargasum sp. This product can be used as a biofilter that retains contaminants from water and have other applications in different industries.	2019	2022	3	2022	Cancún	Potential uses	To obtain activated carbon from sargasum sp. To determine the retention capacity of activated carbon using different contaminants such as: paints, metals, bacteria and detergents. To characterize at the macro and microscopic the qualities of activated carbon.	NA		Instututo Tecnologíco de Cancún	1	1	0		200000
1960	Description of funded projects	Análisis de macro y microelementos (incluidos metales pesados) de Sargassum fluitans y natans enfocado al aprovechamiento en plantas de ornato	Iris Aurora Nava Jimenez; Samuel Tejeda Vega; Hugo Sanchez; Christian Berriozabal; Emely Cortina	5	Academic sector	Universidad Politécnica de Quintana Roo (UPQROO)	This work describes differences in the macro and micro nutrients of S.futans and S.natans so that they can be used in the local and regional industry of fertilizers for ornamental plants.	2018	2021	3	2021	Cancún	Potential uses	To analyze and compare the macro and micro nutrients of S. fuitans and S. natans with the goal of producing biofertilizers.	NA		Instituto Nacional de Investigaciones Nucleares	1	1	0		200000
1970	Description of funded projects	Análisis e identiicación de los elementos químicos quelantes unidos al arsénico en el Sargassum fluitans y natans para su optimo aprovechamiento.	Iris Aurora Nava Jimenez; Samuel Tejeda Vega; Hugo Sanchez; Christian Berriozabal	4	Academic sector	Universidad Politécnica de Quintana Roo (UPQROO)	This work describes absorption of chemical elements by two species of Sargassum. This will determine the amounts of chelating chemicals attached to the arsenic.	2019	2022	3	2022	Cancún	Potential uses	To analyze and compare two species of Sargassum (Sargassum fluitans and Sargassum natans) to determine the amounts of chelating chemical elements bound to arsenic.	NA		Instututo Tecnologíco de Cancún; Instituto Nacional de Investigaciones Nucleares	2	2	0		260000
1980	Description of funded projects	Análisis del efecto farmacológico del Sargassum sp.	Hugo Sanchez Hernández	1	Academic sector	Universidad Politécnica de Quintana Roo (UPQROO)	This research aims to analyze the pharmacological properties of the different types of sargassum extracts for the search of therapeutic alternatives in different microbial pathologies.	2019	2022	3	2022	Mexican caribbean	Potential uses	To identify molecular components of sargassum extracts with inhibitory effects on the growth of pathogenic microorganisms for humans	NA			0	0	0		150000
1990	Description of funded projects	Caracterización del género Sargassum spp. Y sus epífitas asociadas en el Caribe Mexicano	Pamela Herrera Martinez; Iris Nava Jimenez	2	Academic sector	Universidad Politécnica de Quintana Roo (UPQROO)	NA	NA	NA	NA	2022	NA	Potential uses	NA	NA			0	0	0
2000	Website	MALGRASS: Una Sociedad Científica con visión empresarial	Pamela Herrera Martinez; Iris Nava Jimenez; Jorge M. López Calderón	3	Academic sector	Universidad Politécnica de Quintana Roo (UPQROO)	A group of professionals was formed with knowledge in applied sciences, especifically in the energy transfer of primary coastal ecosystems. The main goal is to build alliances for the preservation and sustainable use of the coastal zone and its resources.	2021	To date	NA	2021	Mexican caribbean	Communication and education	NA	NA		UABC	1	1	0	https://consultmar.blogspot.com/
2010	Description of funded projects	Sargazo: Contribución de la Química Analítica desde la Docencia e Investigación Formativa	María Teresa de Rodríguez Salazar	1	Academic sector	Facultad de Química, UNAM	This project will train professionals with the ability to generate, apply, modify and transmit quality information that serves as a strategic tool for the identification and solution of scientific and technical problems that promote sustainable development of the country.	2020	To date	NA	2021	NA	Communication and education	NA	NA			0	0	0
2020	Thesis	Producción de bioetanol a partir de Sargassum spp aplicando pretratamientos hidrotérmicos	Elizabeth Aparicio Velazco	1	Academic sector	Universidad Autónoma de Coahuila (UAdeC)	The production of bioethanol occurs from hydrothermally pretreated Sargassum spp under a third generation biorefinery concept.	NA	2020	NA	2020	NA	Potential uses	To obtain bioethanol from sargassum	Bioethanol production is feasible	Aparacio, E. 2020. Producción de bioetanol a partir de Sargassum spp aplicando pretratamientos hidrotérmicos. Tesis de maestría. Universidad Autónoma de Coahuila.	Universidad Autonoma Agraria Antonio Narro	1	1	0
2030	Website	Sistema de Monitoreo de Sargazo Recolectado (SIMSAR)	Contralmirante Alejandro López Zenteno	1	Government sector	Secretaría de la Marina (SEMAR)	This system will record information on the volumes of sargassum that reaches the coast. This in situ database will be used for research purposes and executive reports, in addition to being considered for decision making.	2021	To date	NA	2021	Mexican caribbean	Monitoring, modeling and early warning	To systematize information on the volumes of sargassum collected at sea and the beach.	NA		SEMARNAT; INECC	2	2	0
2040	Website	Prevención de sargazo y erosión	Antonio Ortiz Hernández; David Gerardo Castañeda Ramírez	3	Private sector	Hotel Moon Palace	The Moon Palace hotels seek low-carbon tourism and carry out a series of actions to reduce their carbon footprint. Within their environmental program they use sargassum as compost, fertilizer and for biodiesel production.	2015	To date	NA	2015	Cancún	Potential uses	To prevent beach erosion and the accumulation of sargassum without polluting or harming the coastal environment.	NA			0	0	0	https://www.palaceresorts.com/es/low-carbon-y-sustentabilidad
