# Supplementary material
Source: MDPI journal article supplement (https://www.mdpi.com/2673-9410/2/3/14)
Supplement: s1 [file s1 › Supplementary File S2.xlsx]

## Sheet: Actores_sargazo
Number of projects	ID	Search by surname	Full name	Strategic line of the CONACYT Agenda	Title	Field of expertise or lines of research	Institution	Location	Sector	Subsector
NA		Abundes-Velasco	Martha Elba Abundes Velasco	Comprehensive attention	Director of Planning and Environmental Policy	NA	Ayuntamiento de Benito Juárez	Tulum, Quintana Roo	Government sector	Municipal
3	840; 1300; 1680	Acosta-González	Dr. Gilberto Acosta González	Socio-economic and environmental impacts	Researcher	Interconnection of groundwater with coastal ecosystems and the effect of socio-environmental factors on groundwater quality	CICY	Mérida, Yucatán	Academic sector
NA		Acosta-Sánchez	Nancy Acosta Sánchez	Comprehensive attention	Municipal deputy director of the environment	NA	Ayuntamiento de Solidaridad, Quintana Roo	Playa del Carmen, Quintana Roo	Government sector	Municipal
1	1720	Aguirre-Gómez	Dr. Raúl Aguirre Gómez	Monitoring, modeling and early warning	Researcher	Marine remote sensing	Instituto de Geografía, UNAM	Ciudad de México	Academic sector
1	1380	Aguirre-Muñoz	Dr. Alfonso Aguirre Muñoz	Comprehensive attention	Advisor on Strategic Issues	NA	Grupo de Ecología y Conservación de Islas, A.C	Ensenada, Baja California	Civil society	NGO
1	1230	Aké-Castillo	Dr. José A. Aké Castillo	Origin and ecological importance	Researcher	Macroalgae ecology. Fauna associated with sargassum	Instituto de Ciencias Marinas y Pesquerías, Universidad Veracruzana	Boca del Río, Veracruz	Academic sector
1	1610	Aké-Madera	Miguel Angel Aké Madera	Potential uses	Founder of Nopalimex	Biogas and green energies	Nopalimex	Zitácuaro, Michoacán	Private sector	Company
NA		Alcérreca-Sánchez	Víctor Manuel Alcérreca Sánchez	Comprehensive attention	Managing Director	NA	Consejo quintanarroense de ciencia y tecnología	Chetumal, Quintana Roo	Government sector	State
2	840; 1300	Aldana-Aranda	Dra. Dalila Aldana Aranda	Communication and education	Researcher	Biological Oceanography. Aquaculture and Fisheries	CINVESTAV, Mérida	Mérida, Yucatán	Academic sector
1	1820	Allende-Arandía	Dra. María Eugenia Allende Arandía	Monitoring, modeling and early warning	Researcher	Physical Oceanography. Ocean-atmosphere interaction and time scales. Regional numerical models	SISAL, UNAM	Mérida, Yucatán	Academic sector
5	1010; 1030; 1040; 1050; 1430	Almazán-Becerril	Dr. Antonio Almazán Becerril	Socio-economic and environmental impacts	Researcher	Effect of sargassum on water quality	CICY	Mérida, Yucatán	Academic sector
NA		Alva-Basurto	Jorge Christian Alva Basurto	Comprehensive attention	Consultant for UNDP and CONANP	NA	Parque nacional Costa Occidental de Isla Mujeres, Punta Cancún y Punta Nizuc	Isla Mujeres, Quintana Roo	Government sector	State
5	850; 1070; 1150; 1270; 1330	Álvarez-Filip	Dr. Lorenzo Álvarez Filip	Socio-economic and environmental impacts	Researcher	Ecology and conservation of coral reefs. Impact of sargassum on reef systems	Unidad Académica de Sistemas Arrecifales UNAM	Puerto Morelos, Quinta Roo	Academic sector
NA		Álvarez-Torres	Dr. Porfirio Álvarez Torres	Comprehensive attention	Advisor for the Consortium of Marine Research Institutions of the Gulf of Mexico (CiiMAR-GoM).	NA	SEMARNAT, CDMX	Ciudad de México	Private sector	Consultant
3	570; 840; 1140	Alzate-Gaviria	Dra. Liliana Alzate Gaviria	Potential uses	Researcher	Biofuels	CICY	Mérida, Yucatán	Academic sector
1	100	Amaro-Mauricio	Biol. Esteban J. Amaro Mauricio	Monitoring, modeling and early warning	Director	Sargassum monitoring	Red de Monitoreo de Sargazo de Quintana Roo	Cancún, Quintana Roo	Civil society	NGO
1	860	Antonio-Martínez	Francisco Antonio Martínez	Socio-economic and environmental impacts	Teacher	Coastal ecology	Universidad Autónoma de Guadalajara	Zapopan, Jalisco	Academic sector
1	1300	Arellano-Guillermo	Alfredo Arellano Guillermo	Comprehensive attention	Secretary of ecology and environment	NA	SEMA, Quintana Roo	Chetumal, Quintana Roo	Government sector	State
4	130; 140; 1300; 1490; 1780	Arellano-Verdejo	Dr. Javier Arellano Verdejo	Monitoring, modeling and early warning	Researcher	Marine remote sensing	ECOSUR Chetumal	Chetumal, Quintana Roo	Academic sector
2	1440; 1730	Arreguin-Sánchez	Dr. Francisco Arreguin Sánchez	Potential uses	Researcher	Effect of Climate Change on Marine Ecosystems	CICIMAR	La Paz, Baja California Sur	Academic sector
1	210	Balmori-Palacios	Edurne Balmori Palacios	Comprehensive attention	Managing Director	NA	METCO	Ciudad de México	Private sector	Company
NA		Baltazar-Cisneros	Herminio Baltazar Cisneros	Comprehensive attention	General Coordinator of Technological and Polytechnic Universities	NA	Secretaría de Educación de Quintana Roo, SEQ	Chetumal, Quintana Roo	Government sector	State
NA		Banaszak	Dra. Anastassia Banaszak	Socio-economic and environmental impacts	Researcher	Photobiology and coral restoration	Unidad Académica de Sistemas Arrecifales UNAM	Puerto Morelos, Quinta Roo	Academic sector
2	810; 820	Barbosa-Solomieu	Dra. Valerie Barbosa Solomieu	International cooperation	Scientific and Technological Cooperation	NA	Embajada de Francia en México	Ciudad de México	Dependencies abroad
NA		Becerra-Vega	Erick Becerra Vega	Comprehensive attention	President	NA	Vive Planeta Azul AC	Cihuatlán, Jalisco	Civil society	NGO
NA		Bonilla	Dra. Andrea Bonilla	Potential uses	Researcher	Bioplastics	BIOPLASTER	Ciudad de México	Private sector	Company
2	660; 1300	Bravo-Quezada	Alejandro Bravo Quezada	Containment, harvest, and disposal	Director	NA	Ocean Solutions Mexico	Cancún, Quintana Roo	Private sector	Company
1	1220	Briones-Fourzán	Dra. Patricia Briones Fourzán	Origin and ecological importance	Researcher	Crustacean ecology and association of crustaceans to macroalgae	Unidad Académica de Sistemas Arrecifales UNAM	Puerto Morelos, Quinta Roo	Academic sector
1	1300	Buitrón-Méndez	Germán Buitrón Méndez	Potential uses	Researcher	Biogas generation	Instituto de Ingeniería, UNAM	Ciudad de México	Academic sector
2	120; 830	Caballero-Aragón	Dr. Hansel Caballero Aragón	Comprehensive attention	Subcoordination of marine monitoring	Marine Monitoring	CONABIO	Ciudad de México	Government sector	Federal
5	840; 1090; 1140; 1300; 1680	Caballero-Vásquez	José Adán Caballero Vásquez	Socio-economic and environmental impacts	Researcher	Sustainability of aquatic ecosystems. Effects of sargassum in deep waters.	CICY	Mérida, Yucatán	Academic sector
4	130; 880; 970; 1110	Cabanillas-Terán	Dra. Nancy Cabanillas Terán	Socio-economic and environmental impacts	Researcher	Systematics and Aquatic Ecology. Interactions between algae, sea urchins and corals, and their response to anthropogenic impacts	ECOSUR Chetumal	Chetumal, Quintana Roo	Academic sector
2	590; 1300	Calixto-Pérez	Dra. Edith Calixto Pérez	Comprehensive attention	Deputy Director of Technology Strategy	NA	Consejo Nacional de Ciencia y Tecnología	Ciudad de México	Government sector	Federal
NA		Camacho-Rico	Fernando Camacho Rico	Comprehensive attention	General Director of Institutional Development and Promotion	NA	CONANP	Ciudad de México	Government sector	Federal
1	180	Camarena-Elizondo	Daniel Camarena Elizondo	Potential uses	CEO	NA	Planta de Gasificación UNAM - SAGARPA - G2E	Ciudad de México	Private sector	Company
NA		Candela-Pérez	Dr. Julio Candela Pérez	Origin and ecological importance	Researcher	Ocean circulation	SALGAX es una empresa 100% Yucateca conformada por biólogos marinos, tiene comomisión ofrecer productos biotecnológicos derivados del ambiente marino, de alta calidad,  0       salgaxventas@salgax.com INICIAR SESIÓN 12/4/2020 Historia de Salgax® www.salgax.com/blog/15/historia-de-salgax 2/6 para usar en diversos sectores como agricultura, farmacéutica, cosmética, industria, entre otros, pr…	Ensenada, Baja California	Academic sector
NA		Cardeña-Peña	Luis Enrique Cardeña Peña	Comprehensive attention	Special Director of Tours and Special Projects	NA	Municipio de Puerto Morelos	Puerto Morelos, Quinta Roo	Government sector	Municipal
NA		Cárdenas-González	Adriana Cárdenas González	Comprehensive attention	Deputy Director of Fisheries and Aquaculture	NA	SEMARNAT, CDMX	Ciudad de México	Government sector	Federal
NA		Carreón	Juan José Carreón	Communication and education	Spokesman	NA	Flora, Fauna y Cultura de México, A. C, Playa del Carmen	Playa del Carmen, Quintana Roo	Civil society	NGO
1	840	Carrillo-Bibriezca	Dra. Laura Elena Carrillo Bibriezca	Origin and ecological importance	Researcher	Oceanography, numerical modelling, ocean circulation	ECOSUR Chetumal	Chetumal, Quintana Roo	Academic sector
3	260; 1110; 1600	Carrillo-Domínguez	Dra. Silvia Carrillo Domínguez	Potential uses	Researcher	Use of non-conventional natural ingredients (marine, vegetable and agro-industrial) in the nutrition and feeding of birds	Instituto Nacional de Ciencias Médicas y Nutrición Salvador Zubirán (INCMNSZ)	Ciudad de México	Academic sector
1	1870	Carrillo-Nieves	Dra. Danay Carrillo Nieves	Potential uses	Researcher	Bioprocesses	Tecnológico de Monterrey (Campus Guadalajara)	Zapopan, Jalisco	Academic sector
1	890	Casas-Beltrán	Dr. Diego Armando Casas Beltrán	Socio-economic and environmental impacts	Researcher	Quality and sustainable use of water	CICY	Mérida, Yucatán	Academic sector
1	260	Casas-Valdez	Dra. María Margarita Casas Valdez	Potential uses	Researcher	Potential uses of macroalgae	CICIMAR	La Paz, Baja California Sur	Academic sector
NA		Caso-Chávez	Dra. Margarita Caso Chávez	Comprehensive attention	General Coordinator of Adaptation to Climate Change	NA	INECC	Ciudad de México	Government sector	Federal
1	2040	Castañeda-Ramírez	David Gerardo Castañeda Ramírez	Comprehensive attention	Environmental Coordinator of Grupo Palace Resorts Foundation	NA	Moon Palace Resort Cancún	Cancún, Quintana Roo	Private sector	Hotel industry
1	450	Castro-Ramos	Jorge Castro Ramos	Potential uses	Company Founder	NA	Renovare	León, Guanajuato	Private sector	Company
2	1300; 1680	Castro-Romero	Dra. Telma Gloria Castro Romero	Socio-economic and environmental impacts	CEO	Atmospheric pollution, in particular by aerosols, as well as the phenomenon of export of pollutants	Centro de Ciencias de la Atmósfera, UNAM	Ciudad de México	Academic sector
1	770	Cauich-May	María Lourdes Cauich May	Potential uses	Company Founder	NA	Bioremar SA de CV	Felipe Carrillo Puerto, Quintana Roo	Private sector	Company
3	120; 830; 1300	Cerdeira-Estrada	Dr. Sergio Cerdeira Estrada	Comprehensive attention	Marine Monitoring Deputy Coordinator	Marine monitoring	CONANP	Ciudad de México	Government sector	Federal
NA		Chapa -Tellez	Contralmirante José Chapa Tellez	Comprehensive attention	Deputy General Manager	NA	SEMAR, Quintana Roo	Islta Mujeres, Quintana Roo	Government sector	Federal
NA		Chaves	Antonio Chaves	Comprehensive attention	President of the Riviera Maya Hotel Association	NA	Asociación de Hoteles de Rivera Maya, A.C	Playa del Carmen, Quintana Roo	Private sector	Hotel industry
1	1330	Chávez-Cerón	Valeria Chávez Cerón	Restoration	Researcher	Numerical hydrodynamic models for the analysis of the hydrosedimentary behavior of key ecosystems. Coastal risk mitigation	Instituto de Ingeniería, UNAM	Ciudad de México	Academic sector
NA		Chávez-Montoya	Mario Chávez Montoya	Comprehensive attention	Deputy Director of Coastal and Marine Resources	NA	SEMARNAT, CDMX	Ciudad de México	Government sector	Federal
2	900; 910	Chávez-Guillén	Rubén Chávez Guillén	Socio-economic and environmental impacts	Groundwater Manager	NA	CONAGUA, CDMX	Ciudad de México	Government sector	Federal
1	720	Chávez-Peñaherrera	Rolando Chávez Peñaherrera	Containment, harvest, and disposal	Representative	NA	DESMI A/S, Denmark	Nørresundby, Denmark	Private sector	Company
1	410	Chay-Casanova	Jesús Antonio Chay Casanova	Potential uses	Researcher	Sargassum as a substrate for the growth of edible fungi	Instituto Tecnológico de Chetumal	Chetumal, Quintana Roo	Academic sector
2	670; 1020	Citrón-Gomez	Roberto Citrón Gomez	Comprehensive attention	President of the Hotel Association of Cancun and Puerto Morelos	NA	Asociación de Hoteles de Cancún y Puerto Morelos	Cancún, Quintana Roo	Private sector	Hotel industry
3	1100; 1110; 1300	Collado-Vides	Ligia Collado Vides	Origin and ecological importance	Researcher	Ecology and physiology of invasive marine macroalgae	Facultad de Ciencias, UNAM	Ciudad de México	Academic sector
1	1300	Córdova-Tapia	Dr. Fernando Córdova Tapia	Comprehensive attention	Area Director	NA	Consejo Nacional de Ciencia y Tecnología	Ciudad de México	Government sector	Federal
1	1360	Cruz-García	Jail Ixel Cruz García	Communication and education	Associate Director	NA	Yóok'ol Kaab Consultoría S.A. de C.V.	Ciudad de México	Private sector	Private organization
1	500	Cruz-Estrada	Dr. Ricardo Herbé Cruz Estrada	Potential uses	Researcher	Recycling and processing of materials	CICY	Mérida, Yucatán	Academic sector
4	150; 1330; 1440; 1500; 1880	Cuevas-Flores	Dr. Eduardo Amir Cuevas Flores	Monitoring, modeling and early warning	Researcher	Sargassum in situ detection and monitoring	CINVESTAV, Mérida	Mérida, Yucatán	Academic sector
1	1360	Czitrom-Baus	Dr. Steven Czitrom Baus	Origin and ecological importance	Researcher	Use of wave energy. Circulation and waves in the coastal zone	ICMyl, UNAM	Ciudad de México	Academic sector
1	1420	Deciga-Campos	Dra. Myrna Deciga Campos	Potential uses	Researcher	Medicinal uses of plants and algae. Drug evaluation	Escuela Superior de Medicina (ESM)	Ciudad de México	Academic sector
1	830	De la Barreda	Dra. Betsabé de la Barreda	International cooperation	Researcher	Sargassum monitoring	University of Nottingham, UK	United Kingdom	Dependencies abroad
1	680	De Luna-Prieto	Édgar Alejandro De Luna Prieto	Containment, harvest, and disposal	General Director	NA	Manufacturas Industriales DP, S.A. de C.V.	Loreto, Zacatecas	Private sector	Company
1	1300	Díaz-Martínez	Sergio Díaz Martínez	Origin and ecological importance	Researcher	Systematics, ecology and distribution of macroalgae	FES Zaragoza	Ciudad de México	Academic sector
NA		Díaz-Mondragón	Salomón Díaz Mondragón	Comprehensive attention	Director of Ecological Planning	NA	SEMARNAT, CDMX	Ciudad de México	Government sector	Federal
NA		Diego	Miguel Diego	Comprehensive attention	Reef protection	NA	Zoëtry Paraíso de la Bonita Riviera Maya	Puerto Morelos, Quinta Roo	Private sector	Hotel industry
NA		Domínguez-Álvarez	Luisa Alejandra Domínguez Álvarez	Comprehensive attention	Deputy Director of Species Conservation and their habitats	NA	INECC	Ciudad de México	Government sector	Federal
1	780	Duarte-Méndez	Saúl Duarte Méndez	Potential uses	Director	NA	Design and Decorative of the Mayan Caribbean	Puerto Morelos, Quinta Roo	Private sector	Company
1	700	Dueñas-García	José de Jesús Dueñas García	Containment, harvest, and disposal	General Director	NA	Preyco S.A de C.V	Guadalajara, Jalisco	Private sector	Company
NA		Duque	Jorge Duque	Comprehensive attention	Director of Wildlife Conservation	NA	SEMARNAT, CDMX	Ciudad de México	Government sector	Federal
2	1640; 1650	Durand-Smith	Dra. Marcia Leticia Durand Smith	Socio-economic and environmental impacts	Researcher	Environmental anthropology and political ecology	Centro Regional de Investigaciones Multidisciplinarias, UNAM	Cuernavaca, Morelos	Academic sector
1	840	Elías	Vidal Elías	Comprehensive attention	Scientific coordinator	NA	Sistemas Estratégicos Para La Gestión Ambiental Sega, S.A. De C.V.	Ciudad de México	Private sector	Consultant
1	840	Enríquez-Díaz	Dra. Martha Enríquez Díaz	International cooperation	Researcher	Technical-Scientific Cooperation Programs	CINVESTAV Mérida	Mérida, Yucatán	Academic sector
1	1300	Enríquez-Domínguez	Dra. Susana Enríquez Domínguez	Socio-economic and environmental impacts	Researcher	Reef systems	Unidad Académica de Sistemas Arrecifales UNAM	Puerto Morelos, Quinta Roo	Academic sector
2	1300; 1880	Enríquez-Ortiz	Dra. Cecilia Enríquez Ortiz	Monitoring, modeling and early warning	Researcher	Marine and coastal hydrodynamics. Numerical modeling	SISAL, UNAM	Sisal, Yucatán	Academic sector
1	1150	Escalante-Mancera	M. en C. Edgar Escalante Mancera	Origin and ecological importance	Researcher	Physical oceanography, coastal processes, remote sensing	Unidad Académica de Sistemas Arrecifales UNAM	Puerto Morelos, Quinta Roo	Academic sector
2	1300; 1290	Escamilla-Martínez	Dr. Agustín Escamilla Martínez	Potential uses	Manager of Renewable Energies of the Mechanical Systems Department	Development of food technologies	CIATEQ A.C, Querétaro	Querétaro, Querétaro	Academic sector
1	1300	Escobar-Briones	Dra. Elva Escobar Briones	Socio-economic and environmental impacts	Researcher	Ecology and Aquatic Biodiversity. Deep sea ecosystems	ICMYL, UNAM	Ciudad de México	Academic sector
3	320; 340; 540	Escobar-Morales	Dra. Beatriz Escobar Morales	Potential uses	Researcher	Renewable energy	CICY	Mérida, Yucatán	Academic sector
1	870	Espinosa	Luis Antonio Espinosa	Socio-economic and environmental impacts	Economist at BBVA Research Mexico	NA	BBVA México Corporativo	Ciudad de México	Private sector	Banks
NA		Fernández-Moreno	Tania Fernández Moreno	Comprehensive attention	General Secretariat of the Municipality of Benito Juárez	NA	Ayuntamiento de Benito Juárez	Tulum, Quintana Roo	Government sector	Municipal
NA		Flores de Santiago	Dr. Francisco Flores de Santiago	Monitoring, modeling and early warning	Researcher	Environmental monitoring of coastal ecosystems	ICMyL, CDMX	Ciudad de México	Academic sector
1	1390	Flores-Martínez	Dr. José Juan Flores Martínez	Socio-economic and environmental impacts	Researcher	Monitoring and registration of invasive species	Instituto de Biología, UNAM	Ciudad de México	Academic sector
NA		Flores-Morado	Contralmirante Enrique Flores Morado	Comprehensive attention	Deputy General Manager	NA	SEMAR, Quintana Roo	Isla Mujeres, Quintana Roo	Government sector	Federal
1	160	Flores-Vidal	Dr. Xavier Flores-Vidal	Monitoring, modeling and early warning	Researcher	Coastal Regional Oceanographic Observatory [OORCo]	UABC Campus Sauzal	Ensenada, Baja California	Academic sector
NA		Fonseca-Parra	Sergio Fonseca Parra	Comprehensive attention	Head of the Special Processes Monitoring Department	NA	SEMARNAT, CDMX	Ciudad de México	Government sector	Federal
1	1690; 1700	Fraga-Berdugo	Dra. Julia Elena Fraga Berdugo	Socio-economic and environmental impacts	Researcher	Coastal socio-ecological systems and governance mechanisms	CINVESTAV, Mérida	Mérida, Yucatán	Academic sector
NA		Fulton	Stuart Roger Fulton	Communication and education	Research coordinator	Citizen science	Comunidad y Biodiversidad, A.C. (COBI)	Guaymas, Sonora	Civil society	NGO
NA		Galindo de Prince	Catalina Galindo de Prince	Communication and education	Executive Director	NA	Amigos de Isla Contoy AC	Cancún, Quintana Roo	Civil society	NGO
1	750	Gaona	Jorge Gaona	Containment, harvest, and disposal	Design Director	NA	Tecno Productos Gab SA de CV	Ciudad de México	Private sector	Company
NA		García-Ibarra	Dr. Carlos Alfonso García Ibarra	Comprehensive attention	Director of Planning	NA	SECTUR, CDMX	Ciudad de México	Government sector	Federal
2	1030; 1040	García-Mendoza	Dr. Ernesto García Mendoza	Socio-economic and environmental impacts	Researcher	Phycology. Algal blooms. Phycotoxicology.	CICESE	Ensenada, Baja California	Academic sector
NA		García-Nuño	José Armando García Nuño	Comprehensive attention	General Director of Planning	NA	SECTUR, Quinta Roo	Chetumal, Quintana Roo	Government sector	Federal
1	1070	García-Rivas	María del Carmen García Rivas	Comprehensive attention	Director	NA	Parque Nacional Arrecife de Puerto Morelos	Puerto Morelos, Quinta Roo	Government sector	State
3	1110; 1150; 1330	García-Sánchez	Dr. Marta García Sánchez	Origin and ecological importance	Researcher	Sargassum ecophysiology	Unidad Académica de Sistemas Arrecifales UNAM	Puerto Morelos, Quinta Roo	Academic sector
1	630	Garfias-González	José Antonio Garfias González	Containment, harvest, and disposal	Student	NA	UPIICSA, IPN	Ciudad de México	Academic sector
1	360	Gayosso-Rodríguez	Salomé Gayosso-Rodríguez	Potential uses	Researcher	Use of sargassum as an agricultural substrate	Instituto Tecnológico de Conkal	Mérida, Yucatán	Academic sector
1	400	Gómez-Hernández	Mauricio Gómez Hernández	Potential uses	Founder	NA	Salgax Biotecnología Marina Aplicada S. de R.L. de C.V.	Mérida, Yucatán	Private sector	Company
1	1720	Gómez-Rodríguez	Gabriela Gómez Rodríguez	Monitoring, modeling and early warning	Researcher	Marine remote sensing	Instituto de Geografía, UNAM	Ciudad de México	Academic sector
1	1300; 1730	González-Cano	Dr. Jaime González Cano	Origin and ecological importance	Researcher	NA	INAPESCA, Quintana Roo	Puerto Morelos, Quinta Roo	Government sector	State
1	740	González-Fernández	Héctor González Fernández	Containment, harvest, and disposal	COO	NA	The Ocean Cleaner INC, Québec	Québec, Canada	Private sector	Company
1	380	González-Fuentes	Dra. Fanny Jaqueline González Fuentes	Potential uses	Researcher	Molecular engineering of materials	Centro de Física Aplicada y Tecnología Avanzada, UNAM, Juriquilla	Juriquilla, Querétaro	Academic sector
1	980	González-Vera	Maria Angélica González Vera	Socio-economic and environmental impacts	Postgraduate Coordinator	NA	Universidad de Quintana Roo, Chetumal	Chetumal, Quintana Roo	Academic sector
NA		Herguera-García	Dr. Juan Carlos Herguera García	Monitoring, modeling and early warning	Technical coordination	Variability and climatic change in the circulation, biogeochemistry and ecology of marine currents	CICESE	Ensenada, Baja California	Academic sector
NA		Hermosillo-López	Lic. Ángel Pedro Hermosillo López	Comprehensive attention	President of the Cozumel Hotel Association Director of Tourism	NA	Asociación de Hoteles y Moteles de Cozumel	Cozumel, Quintana Roo	Private sector	Hotel industry
NA		Hernández-Aguilar	Rodrigo Hernández Aguilar	Comprehensive attention	Director ZOFEMAT	NA	SEMARNAT, CDMX	Ciudad de México	Government sector	Federal
4	840; 880; 1100; 1300	Hernández-Arana	Dr. Héctor Abuid Hernández Arana	Socio-economic and environmental impacts	Researcher	Structure and function of benthic habitats. Effect of natural and human disturbances on coastal ecosystems, ecology of mangrove ecosystems and coral reefs, conservation of marine biodiversity. Applications of remote sensing for the observation of coastal ecosystems.	ECOSUR Chetumal	Chetumal, Quintana Roo	Academic sector
1	390	Hernández-Herrera	Dra. Rosalba Mireya	Potential uses	Researcher	Phycology and potential uses in agriculture	Universidad de Guadalajara	Guadalajara, Jalisco	Academic sector
2	1540; 1710	Hernández-Núñez	Dr. Emanuel Hernández Núñez	Potential uses	Researcher	Chemistry of marine natural products	CINVESTAV, Mérida	Mérida, Yucatán	Academic sector
1	840	Hernández-Terrones	Dra. Laura Margarita Hernández Terrones	Socio-economic and environmental impacts	Researcher	Impacts on aquifers	Universidad del Caribe, Cancún	Cancún, Quintana Roo	Academic sector
1	1130	Hernández-Toro	Dra. Isabel María Hernández Toro	Comprehensive attention	Director of Conservation of Ecosystems and Adaptation to Climate Change	NA	INECC	Ciudad de México	Government sector	Federal
2	840; 1140	Hernández-Zepeda	Dra. Cecilia Hernández Zepeda	Socio-economic and environmental impacts	Researcher	Ecology and Dynamics of Aquatic Ecosystems. Contamination of aquifers	CICY	Mérida, Yucatán	Academic sector
2	1990; 2000	Herrera-Martínez	Dra. Pamela Herrera Martínez	Socio-economic and environmental impacts	Researcher	Wetland ecology and study of ecological bioindicators in calcareous macroalgae reefs	Universidad Politécnica de Quintana Roo	Cancún, Quintana Roo	Academic sector
4	940; 960; 990; 1080	Herrera-Pavón	Roberto Luis Herrera Pavón	Socio-economic and environmental impacts	State Sea Turtle Committee of Quintana Roo	NA	Ayuntamiento Benito Juárez	Tulum, Quintana Roo	Civil society	NGO
1	1300	Herrera-Silveira	Dr. Jorge Herrera-Silveira	Socio-economic and environmental impacts	Researcher	Ecology of primary production and biogeochemical processes of coastal ecosystems	CINVESTAV Mérida	Mérida, Yucatán	Academic sector
1		Icaza-Longoria	Dr. Álvarez de Icaza Longoria	Potential uses	Researcher	Mechanical Engineering	Instituto de Ingeniería, UNAM	Ciudad de México	Academic sector
1	640	Isassi-Martínez	César Humberto Isassi Martínez	Containment, harvest, and disposal	Company Founder	NA	GOIMAR SA de CV	Ciudad del Carmen, Campeche	Private sector	Company
3	520; 650; 710	Jauregui-Chávez	Arq. David Jauregui Chávez	Containment, harvest, and disposal	Representative	NA	Grupo Dakatso de México S. A. de C. V. / Sargazo Solutions	Playa del Carmen, Quintana Roo	Private sector	Company
1	350	Jáuregui-Jáuregui	Jesús Antonio Jáuregui Jáuregui	Potential uses	Researcher	Bioengineering and Chemical Engineering	Tec de Monterrey, Campus Guadalajara	Zapopan, Jalisco	Academic sector
NA		Jiménez	Dr. Sergio Jiménez	Origin and ecological importance	Director and Researcher	Oceanographic models	CIDIPORT, Universidad Autónoma de Tamaulipas	Tampico, Tamaulipas	Academic sector
NA		Jiménez-Escudero	Mtro. Víctor Manuel Jiménez Escudero	Monitoring, modeling and early warning	Researcher	Remote sensing and image processing	Instituto de Geografía, UNAM	Ciudad de México	Academic sector
2	1270; 1450	Jordán-Dahlgren	Dr. Eric Jordán Dahlgren	Socio-economic and environmental impacts	Researcher	Reef ecology	Unidad Académica de Sistemas Arrecifales UNAM	Puerto Morelos, Quinta Roo	Academic sector
1	490	Juárez	Dra. Zaida Nelly Juárez	Potential uses	Researcher	Study of natural products towards areas of health, pharmaceuticals, and agri-food.	Universidad Popular Autónoma del Estado de Puebla	Puebla, Puebla	Academic sector
NA		Juárez-Luna	Dr. Gregorio Nicolás Juárez Luna	Potential uses	Researcher	Extraction of structural carbohydrates (alginate and cellulose) from sargassum	Universidad Iberoamericana	Ciudad de México	Academic sector
NA		Kato-Miranda	M. C. Enrique Kato Miranda	Potential uses	Researcher	Construction	CIATEC A.C	León, Guanajuato	Academic sector
NA		Landa-Romo	M. C. Cintia Landa Romo	Comprehensive attention	Project Officer of the Protected Areas Conservation Program	NA	Fondo Mexicano para la Conservación de la Naturaleza, A. C.	Ciudad de México	Civil society	NGO
NA		Lavalle-Reyes	Silvia Lavalle Reyes	Comprehensive attention	Director of Biodiversity and Natural Areas	NA	SEMA, Quintana Roo	Chetumal, Quintana Roo	Government sector	State
4	130; 140; 1300; 1490; 1780	Lazcano-Hernández	Dr. Hugo Enrique Lazcano Hernández	Monitoring, modeling and early warning	Researcher	Marine Remote Sensing	ECOSUR Chetumal	Chetumal, Quintana Roo	Academic sector
5	620; 840; 890; 1140; 1330	Leal-Bautista	Dr. Rosa María Leal-Bautista	Regulations	Researcher	Characterization of sargassum	CICY	Mérida, Yucatán	Academic sector
NA		Lee-Alardin	Dr. William H. Lee Alardin	Comprehensive attention	Scientific Research Coordinator	Comprehensive attention of sargassum	Instituto de Astronomía, UNAM	Ciudad de México	Academic sector
1	1350	León-Diez	Dr. Cuauhtémoc León Diez	Comprehensive attention	Director	NA	Centro de especialistas en gestión ambiental (CEGAM)	Ciudad de México	Civil society	NGO
NA		León-Oropeza	Alberto León Oropeza	Comprehensive attention	Regional Directorate Yucatan Peninsula and Mexican Caribbean CONANP	NA	CONANP	Ciudad de México	Government sector	Federal
NA		Ley-Cooper	Dr. Kim Ley-Cooper	Comprehensive attention	Founder	NA	Razonatura AC	Playa del Carmen, Quintana Roo	Civil society	NGO
2	150; 1500	Liceaga-Correa	Dra. María de los Ángeles Liceaga-Correa	Monitoring, modeling and early warning	Researcher	Remote Sensing and GIS	CINVESTAV Mérida	Mérida, Yucatán	Academic sector
NA		Lino-González	Josué Fausto Lino González	Comprehensive attention	Deputy Director of Analysis and Special Projects	NA	SEMARNAT, CDMX	Ciudad de México	Government sector	Federal
NA		Lizárraga-Cubedo	Héctor Antonio Lizárraga Cubedo	Comprehensive attention	director	NA	Centro Ecológico Akumal	Akumal, Quintana Roo	Civil society	NGO
NA		Loeza-Pacheco	Marco Antonio Loeza Pacheco	Comprehensive attention	Director of the Federal Maritime-Terrestrial Zone	NA	Municipio de Solidaridad, Quintana Roo	Playa del Carmen, Quintana Roo	Government sector	Municipal
1	1190	López-Aguilar	Héctor Alfredo López Aguilar	Potential uses	Researcher	Biogas production	Universidad La Salle Chihuahua	Chihuahua, Chihuahua	Academic sector
NA		López-Espinosa	Ingeniero Juan Gabriel López Espinosa	Comprehensive attention	Local Director in Quintana Roo	NA	CONAGUA, CDMX	Ciudad de México	Government sector	State
1	1300	López-López	Dr. Víctor Manuel López López	Socio-economic and environmental impacts	Coordinator of the Natural Resources and Climate Change Project of the Engineering Academy of Mexico	Adaptation measures to the impacts of climate change. Climate change and its impacts.	UPIITA, IPN	Ciudad de México	Academic sector
1	460; 1920	López-Miranda	Dr. Jose Luis López Miranda	Potential uses	Researcher	Materials and nanotechnology	Centro de Física Aplicada y Tecnología Avanzada, UNAM, Juriquilla	Juriquilla, Querétaro	Academic sector
1	830	López-Ramírez	Dr. Pablo López Ramírez	Monitoring, modeling and early warning	Researcher	Geospatial Information Sciences	Centro GEO	Ciudad de México	Academic sector
NA		López-Urban	Anaid Ibeth López Urban	Comprehensive attention	Head of the Department of Integration of Environmental Regulations for Tourism	NA	SEMARNAT, CDMX	Ciudad de México	Government sector	Federal
2	1760; 1800	López-Zenteno	Alejandro López Zenteno	Comprehensive attention	Coordinator of the National Anti-Sargasso Strategy 2021	NA	SEMAR, CDMX	Ciudad de México	Government sector	Federal
NA		Lozano-Álvarez	Dr. Enrique Lozano Álvarez	Socio-economic and environmental impacts	Researcher	Shellfish ecology	Unidad Académica de Sistemas Arrecifales UNAM	Puerto Morelos, Quinta Roo	Academic sector
NA		Lozoya-Gloria	Dr. Edmundo Lozoya Gloria	Potential uses	Researcher	Uses of macroalgae. Biofertilizers based on live microalgae	CINVESTAV, Irapuato	Irapuato, Guanajuato	Academic sector
1	830	Magaldi-Hermosillo	Dr. Adolfo V. Magaldi Hermosillo	Monitoring, modeling and early warning	Researcher	Marine Remote Sensing	Centro de Ciencias de la Atmósfera, UNAM	Ciudad de México	Academic sector
3	840; 960; 990	Maldonado-Saldaña	Gisela Maldonado Saldaña	Comprehensive attention	Member	NA	Comité Estatal Grupo Tortuguero del Caribe	Tulum, Quintana Roo	Civil society	NGO
NA		Maldonado-Saldaña	Gustavo Maldonado Saldaña	Comprehensive attention	Director of Municipal Planning	NA	Ayuntamiento de Tulum	Tulum, Quintana Roo	Government sector	Municipal
1	1300	Mariño-Tapia	Dr. Ismael Mariño Tapia	Monitoring, modeling and early warning	Researcher	Physical oceanography. Numerical models	CINVESTAV, Mérida	Mérida, Yucatán	Academic sector
NA		Martí-Flores	Erwin Armando Martí Flores	Comprehensive attention	Head of Department of Environmental Processes	NA	INECC	Ciudad de México	Government sector	Federal
1	510	Martínez	Norma Martínez	Potential uses	Company Founder	NA	Creamos Más SA DE CV	Cancún, Quintana Roo	Private sector	Company
NA		Martínez-Arroyo	Dra. María Amparo Martínez Arroyo	Comprehensive attention	CEO	NA	INECC	Ciudad de México	Government sector	Federal
1	480	Martínez-Carrera	Dr. Daniel Martínez-Carrera	Potential uses	Researcher	Bioconversion of sargassum into edible mushrooms	Colegio de Postgraduados, Campus Puebla	Puebla, Puebla	Academic sector
1	1370	Martínez-González	Gustavo Martínez-González	Comprehensive attention	Director of Project Planning for Public Investment	NA	Ayuntamiento de Solidaridad, Quintana Roo	Playa del Carmen, Quintana Roo	Government sector	Municipal
NA		Martín-Tzuc	Nancy Eugenia Martín Tzuc	Comprehensive attention	Department of Sustainable Environment and Climate Change (Playa del Carmen)	NA	Ayuntamiento de Solidaridad, Quintana Roo	Playa del Carmen, Quintana Roo	Government sector	Municipal
4	220; 1330; 1510; 1580	Masiá-Nebot	Luis Miguel Masiá Nebot	Potential uses	Representative/Founder of Company	NA	Alquimar SA de CV	Cancún, Quintana Roo	Private sector	Company
1	1160	Mateo-Cid	Dra. Luz Elena Mateo Cid	Origin and ecological importance	Researcher	Phycology and Molecular Systematics	Escuela Nacional de Ciencias Biológicas, IPN	Ciudad de México	Academic sector
NA		Meade-Ocaranza	Mtra. Lydia Meade Ocaranza	Comprehensive attention	Director of Forest Regulation and Coastal Resources	NA	SEMARNAT, CDMX	Ciudad de México	Government sector	Federal
NA		Mendoza	Arturo Mendoza	Comprehensive attention	Representative of Newton Fund Mexico	NA	UK Embassy in México	Ciudad de México	Dependencies abroad
NA		Mendoza-Aguirre	Sergio Israel Mendoza Aguirre	Comprehensive attention	General Director of Environmental, Urban and Tourism Development	NA	SEMARNAT, CDMX	Ciudad de México	Government sector	Federal
1	1210	Mendoza-Becerril	Dra. María A. Mendoza-Becerril	Socio-economic and environmental impacts	Researcher	Hydrozoan biology and ecology	Centro de Investigaciones Biológicas del Noroeste (CIBNOR)	La Paz, Baja California Sur	Academic sector
2	110; 1480	Mendoza-Galicia	Ehecatl Mendoza Galicia	Monitoring, modeling and early warning	Director	NA	TRAVELFEST	Yecapixtla, Morelos	Civil society	NGO
NA		Merediz-Alonso	Gonzalo Merediz Alonso	Comprehensive attention	director	NA	Amigos de SianKaan	Cancún, Quintana Roo	Civil society	NGO
NA		Merino-Ibarra	Dr. Martín Merino Ibarra	Socio-economic and environmental impacts	Researcher	Aquatic Biogeochemistry. Technological innovations to restore eutrophicated water bodies.	ICMyL, CDMX	Ciudad de México	Academic sector
3	1220; 1050; 1330	Monroy-Velázquez	Dra. Luz Veronica Monroy Velázquez	Origin and ecological importance	Researcher	Reef ecology	Unidad Académica de Sistemas Arrecifales UNAM	Puerto Morelos, Quinta Roo	Academic sector
NA		Montalvo-Pérez	Yafith Abdel Montalvo Pérez	Comprehensive attention	Solid Waste Directorate of the Secretariat of Ecology and Environment	NA	SEMA, Quintana Roo	Isla Mujeres, Quintana Roo	Government sector	State
NA		Mora-Tembre	Biol. Luis Antonio Mora Tembre	Comprehensive attention	Analyst	NA	SEMA, Quintana Roo	Isla Mujeres, Quintana Roo	Government sector	State
1	190	Moreno-Sandoval	Marco Moreno Sandoval	Potential uses	Executive Director	NA	Abaplas	Tlaquepaque, Jalisco	Private sector	Company
1	760	Morfín	Victoria Morfín	Potential uses	Company Founder	NA	Sargánico Sustainable Products	Cancún, Quintana Roo	Private sector	Company
NA		Muñoz-Cruz	Teniente Naval y Biol. Elvia Muñoz Cruz	Comprehensive attention	Deputy Director of Biological Research	NA	SEMAR, CDMX	Ciudad de México	Government sector	Federal
1	310	Muñoz-López	Andrés Muñoz López	Potential uses	Managing Director	NA	EnerGryn	Puerto Morelos, Quinta Roo	Private sector	Company
2	270; 1300	Muñoz-Sevilla	Dra. Norma Patricia Muñoz Sevilla	Potential uses	Researcher	Marine biochemistry. Comprehensive management of sargassum.	CIIEMAD, IPN	Ciudad de México	Academic sector
1	690	Murillo-García	Mayra Murillo García	Containment, harvest, and disposal	Student	NA	UNAM, CDMX	Ciudad de México	Academic sector
1	1400	Muthuswamy-Ponniah	Dr. Jonathan Muthuswamy Ponniah	Socio-economic and environmental impacts	Researcher	Management and handling of landscape heritage	CIIEMAD, IPN	Ciudad de México	Academic sector
NA		Nah-Chan	Biol. Angela Beatriz Nah Chan	Comprehensive attention	Department of Ecological Planning	NA	SEMA, Quintana Roo	Isla Mujeres, Quintana Roo	Government sector	State
NA		Nava-Hernández	Sandra Nava Hernández	Comprehensive attention	Head of the Department of Legal Analysis	NA	SEMARNAT, CDMX	Ciudad de México	Government sector	Federal
5	280; 840; 1960; 1970; 1990	Nava-Jiménez	Iris Aurora Nava Jiménez	Potential uses	Director of the biotechnology and engineering educational program	Sargassum-based biofertilizers	Universidad Politécnica de Quintana Roo	Cancún, Quintana Roo	Academic sector
1	170	Noyola-Medrano	Dra. María Cristina Noyola Medrano	Monitoring, modeling and early warning	Researcher	Remote Sensing and GIS	UASLP	San Luis, San Luis Potosí	Academic sector
1	1660	Noyola-Robles	Dr. Adalberto Noyola Robles	Potential uses	Researcher	Environmental engineering; anaerobic processes	Instituto de Ingeniería, UNAM	Ciudad de México	Academic sector
NA		Origel-Moreno	Monserrat Origel Moreno	Origin and ecological importance	Researcher of the Network of Talents of Mexicans in the Netherlands	Oceanography	Embajada del Reino de los Países Bajos en México	Ciudad de México	Dependencies abroad
1	1310	Ortegón-Aznar	Dra. Ileana Ortegón Aznar	Potential uses	Researcher	Phycology. Use of sargassum for compost	Universidad Autónoma de Yucatán (UADY)	Mérida, Yucatán	Academic sector
1	2040	Ortiz-Hernández	Biólogo Antonio Ortiz Hernández	Socio-economic and environmental impacts	Environmental Management	NA	Moon Palace Resort Cancún	Cancún, Quintana Roo	Private sector	Hotel industry
NA		Ortiz-Mena	David Ortiz Mena	Comprehensive attention	President of the Tulum Hotels Association	NA	Asociación de Hoteles de Tulum	Tulum, Quintana Roo	Private sector	Hotel industry
1	1240	Paraguay-Delgado	Francisco Paraguay Delgado	Origin and ecological importance	Researcher	Material Physics. Sargassum as part of carbon sinks	Centro de Investigación en Materiales Avanzados SC (CIMAV)	Chihuahua, Chihuahua	Academic sector
NA		Paredes-Mendoza	Lic. Manuel Paredes Mendoza	Comprehensive attention	Executive Director at the Hotel Association of the Riviera Maya	NA	Asociación de Hoteles de Rivera Maya, A.C	Playa del Carmen, Quintana Roo	Private sector	Hotel industry
1	840	Paredes-Rangel	Beatriz Paredes Rangel	Comprehensive attention	Senator	NA	Senado de la Republica, CDMX	Ciudad de México	Government sector	Federal
NA		Parra-Tabla	Ing. Hugo Parra Tabla	Comprehensive attention	Deputy Manager of Sectoral Programs for Water Quality	NA	CONAGUA, CDMX	Ciudad de México	Government sector	Federal
NA		Pech-Varguez	Dr. José Luis Pech Varguez	Comprehensive attention	Senator	NA	Senado de la Republica, CDMX	Ciudad de México	Government sector	Federal
1	470	Pedraza-Segura	Lorena Leticia Pedraza Segura	Potential uses	Researcher	Biofuel generation	Universidad Iberoamericana	Ciudad de México	Academic sector
1	1300	Pedrozo-Acuña	Dr. Adrián Pedrozo Acuña	Comprehensive attention	Managing Director	NA	IMTA	Jiutipec, Morelos	Government sector	Federal
1	1360	Penié-Rodríguez	Iván Penié Rodríguez	Comprehensive attention	Environmental Research Coordinator	NA	Centro Ecológico Akumal	Akumal, Quintana Roo	Civil society	NGO
1	1680	Peralta-Rosales	Dr. Oscar Augusto Peralta Rosales	Socio-economic and environmental impacts	Researcher	Study of the evolution of aerosols through measurements of physical and chemical properties and theoretical studies using satellite data	Centro de Ciencias de la Atmósfera, UNAM	Ciudad de México	Academic sector
2	290; 1300	Pereira-Corona	Dr. Alberto Pereira Corona	Socio-economic and environmental impacts	Researcher	Ecology and land use. Characterization of heavy metals in sargassum	Universidad de Quintana Roo, campus Riviera Maya	Playa del Carmen, Quintana Roo	Academic sector
NA		Pérez de la Fuente	Gladys Pérez de la Fuente	International cooperation	Environmental consultant for the Ibero-American Beach Management and Certification Network (PROPLAYAS) in the Riviera Maya	NA	Ayuntamiento de Solidaridad, Quintana Roo	Playa del Carmen, Quintana Roo	Civil society	NGO
NA		Pérez-Lozada	David Pérez Lozada	Comprehensive attention	Deputy Director of Census	NA	SEMARNAT, CDMX	Ciudad de México	Government sector	Federal
4	320; 330; 340; 1890	Pérez-Salcedo	Dr. Kehila Yehudá Pérez-Salcedo	Potential uses	Researcher	Power generation from sargassum	CICY, Unidad de Energía Renovable	Mérida, Yucatán	Academic sector
NA		Pola-Rodríguez	Fernando Roberto Pola Rodríguez	Comprehensive attention	Deputy Director of Ecology	NA	Ayuntamiento de Cozumel	Cozumel, Quintana Roo	Government sector	Municipal
1	1300	Quijano-Govantes	Dr. Guillermo Quijano Govantes	Potential uses	Researcher	Polymer development. Power generation. Biogas	Instituto de Ingeniería, UNAM Unidad Académica Juriquilla	Juriquilla, Querétaro	Academic sector
2	120; 830	Ressl	Dr. Rainer Andreas Ressl	Monitoring, modeling and early warning	Director of Geomatics	NA	CONABIO	Ciudad de México	Government sector	Federal
1	1810	Ricardez	Manuel Ricardez	Potential uses	Director, Mexico	NA	C-Combinator	Puerto Morelos, Quinta Roo	Private sector	Company
2	1170; 1180	Rivera-Muñoz	Gerardo Rivera Muñoz	Potential uses	Researcher	Bioenzymatic and microbial biotechnology	Instituto Tecnológico de Mérida	Mérida, Yucatán	Academic sector
9	580; 1210; 1250; 1300; 1460; 1520; 1530; 1540; 1550; 1620; 1690; 1840	Robledo-Ramírez	Dr. Daniel Robledo Ramírez	Origin and ecological importance	Researcher	Ecology and physiology of marine algae from the Gulf of Mexico and the Caribbean	CINVESTAV, Mérida	Mérida, Yucatán	Academic sector
NA		Rodríguez-Fernández	Dr. Oliverio Santiago Rodríguez Fernández	Potential uses	Researcher	Nanocomposite materials	Centro de Investigación en Química Aplicada (CIQA)	Saltillo, Coahuila	Academic sector
8	840; 1050; 1100; 1110; 1220; 1270; 1330; 1450	Rodríguez-Martínez	Dra. Rosa Elisa Rodríguez Martínez	Socio-economic and environmental impacts	Researcher	Coral Reef Ecology	Unidad Académica de Sistemas Arrecifales UNAM	Puerto Morelos, Quinta Roo	Academic sector
NA		Rodríguez-Sobreyra	M en C. Ranulfo Rodríguez Sobreyra	Monitoring, modeling and early warning	Researcher	Ocean Climatology and Regional Physical Oceanography Based on Satellite Images	ICMyL, CDMX	Ciudad de México	Academic sector
NA		Román-Valerio	Capitán Francisco J. Román Valerio	Comprehensive attention	Commander of the Task Force (CFT) Sargassum 2020	NA	SEMAR, Quintana Roo	Isla Mujeres, Quintana Roo	Government sector	Federal
1	300	Romero-Morales	Héctor Romero Morales	Potential uses	Director	NA	Dianco SAPI de CV	Cancún, Quintana Roo	Private sector	Company
2	1250; 1260	Rosado-Espinosa	Luis Alberto Rosado Espinosa	Origin and ecological importance	Researcher	Phycology and sustainable management of natural resources	Universidad Autónoma de Yucatán	Mérida, Yucatán	Academic sector
NA		Rosado-Solorzano	Roberto Rosado Solorzano	Comprehensive attention	Deputy Director of Technical Assistance in the Ecological Planning Process	NA	SEMARNAT, CDMX	Ciudad de México	Government sector	Federal
1	530	Rosales-Uc	Elsy María Rosales Uc	Potential uses	Researcher	Renewable energy	Instituto Tecnológico Superior Progreso ·	Progreso, Yucatán	Academic sector
2	880; 940	Ruiz-Zárate	Dr. Miguel Ángel Ruiz Zárate	Socio-economic and environmental impacts	Researcher	Coral reefs	ECOSUR Chetumal	Chetumal, Quintana Roo	Academic sector
1	1840	Salazar-Garibay	Dr. Adán Salazar Garibay	Monitoring, modeling and early warning	Researcher	Remote sensing and digital image processing	Centro GEO	Sierra Papacal, Yucatán	Academic sector
1	1060	Saldaña-Fabela	Dra. María del Pilar Saldaña Fabela	Socio-economic and environmental impacts	Researcher	Studies of water quality, aquatic bioindicators and aquatic toxicology	Instituto Mexicano de Tecnología del Agua (IMTA)	Jiutipec, Morelos	Academic sector
NA		Saldaña-Fraire	Graciela Saldaña Fraire	Comprehensive attention	Undersecretary for Environmental Policy	NA	SEMA, Quintana Roo	Isla Mujeres, Quintana Roo	Government sector	State
3	550; 560; 1870	Saldarriaga-Hernández	Sara Saldarriaga-Hernández	Potential uses	Researcher	Biotransformation and biotechnology	Tec de Monterrey, Campus Monterrey	Monterrey, Nuevo León	Academic sector
NA		Saldívar-Chávez	M. en C. María Antonieta Saldívar Chávez	Communication and education	Director of Planning and Management	Information and communication technology systems and library services	CICY	Mérida, Yucatán	Academic sector
1	1300	Saldívar-Guerra	Dr. Enrique Saldívar Guerra	Potential uses	Director of Research and Outreach	Synthesis of new polymers	Centro de Investigación en Química Aplicada (CIQA)	Saltillo, Coahuila	Academic sector
1	610	Salgado-Jiménez	Dr. Tomás Salgado Jiménez	Containment, harvest, and disposal	Researcher	Control and Automation	Centro de Ingeniería y Desarrollo Industrial (CIDESI), Santiago de Querétaro	Santiago de Querétaro, Querétaro	Academic sector
1	1850	Salinas-Prieto	Dr. José Antonio Salinas Prieto	Monitoring, modeling and early warning	Researcher	Tropical Meteorology and Coastal Oceanography	IMTA	Jiutipec, Morelos	Academic sector
NA		San Vicente-Tello	Dra. Adelita San Vicente Tello	Comprehensive attention	General Director of the Primary Sector and Renewable Natural Resources	NA	SEMARNAT, CDMX	Ciudad de México	Government sector	Federal
NA		Sánchez-Espejo	Elizardo Sánchez Espejo	Comprehensive attention	General Director of Zofemat in Quintana Roo	NA	Ayuntamiento de Isla Mujeres	Isla Mujeres, Quintana Roo	Government sector	Municipal
1	840; 1980	Sánchez-Hernández	Dr. Hugo Sánchez Hernández	Potential uses	Researcher	Sargassum bioproducts	Universidad La Salle Cancún	Cancún, Quintana Roo	Academic sector
1	830	Sánchez-Siordia	Dr. Oscar Gerardo Sánchez Siordia	Monitoring, modeling and early warning	Researcher	Computational Geointelligence	Centro Geo	Sierra Papacal, Yucatán	Academic sector
NA		Santamaría del Ángel	Dr. Eduardo Santamaría del Ángel	Monitoring, modeling and early warning	Researcher	Primary productivity from remote sensing	Universidad Autónoma de Baja California (UABC), Facultad de Ciencias Marinas	Ensenada, Baja California	Academic sector
NA		Schmitter-Soto	Dr. Juan Jacobo Schmitter Soto	Socio-economic and environmental impacts	Researcher	Systematics, synecology and biogeography of freshwater fishes from Mexico and Central America, as well as ecology of reef fishes from the Mexican Caribbean	ECOSUR Chetumal	Chetumal, Quintana Roo	Academic sector
3	1160; 1340; 1470	Sentíes-Granados	Dr. Abel Sentíes Granados	Origin and ecological importance	Researcher	Systematics and ecology of algae	UAM-I Iztapalapa, Laboratorio Macroalgas Marinas y Salobres	Ciudad de México	Academic sector
1	1300	Serrano-Pavón	Alejandra Serrano Pavón	Comprehensive attention	Environmental Lawyer	NA	Centro Mexicano de Derecho Ambiental (CEMDA)	Ciudad de México	Civil society	NGO
2	1200; 1210; 1620; 1840	Serviere-Zaragoza	Dra. Elisa Serviere Zaragoza	Origin and ecological importance	Researcher	Marine Botany. Marine benthic communities. Trophic ecology of algal-herbivore interaction	Centro de Investigaciones Biológicas del Noroeste (CIBNOR)	La Paz, Baja California Sur	Academic sector
4	840; 1300; 1740; 1750; 1900	Sheinbaum-Pardo	Dr. Julio Sheinbaum Pardo	Monitoring, modeling and early warning	Researcher	Physical oceanography. Circulation of the Gulf of Mexico and Caribbean Sea	CICESE	Ensenada, Baja California	Academic sector
1	420	Silva-Bátiz	Francisco de Asís Silva Bátiz	Potential uses	Researcher	Sustainable Development of Coastal Zones	Centro Universitario de la Costa Sur - Universidad de Guadalajara	Autlán de Navarro, Jalisco	Academic sector
5	380; 460; 1120; 1300; 1330	Silva-Casarín	Dr. Rodolfo Silva Casarín	Socio-economic and environmental impacts	Researcher	Coastal and estuarine processes. Risk assessment in coastal areas	Instituto de Ingeniería, UNAM	Ciudad de México	Academic sector
1	790	Solis-Oba	Dra. María Myrna Solis Oba	Potential uses	Researcher	Biotechnology and agricultural sciences	CIBA-IPN	Tlaxcala, Estado de Mexico	Academic sector
2	430; 1170	Solis-Pereira	Dra. Sara Elena Solis Pereira	Potential uses	Researcher	Enzymatic and Microbial Biotechnology	Instituto Tecnológico de Mérida	Mérida, Yucatán	Academic sector
2	1220; 1360	Solís-Weiss	Dra. Vivianne Solís Weiss	Socio-economic and environmental impacts	Researcher	Polychaete ecology	Unidad Académica de Sistemas Arrecifales UNAM	Puerto Morelos, Quinta Roo	Academic sector
NA		Sosa-Casanova	Vanesa Sosa Casanova	Comprehensive attention	City Council Othón P. Blanco	NA	Ayuntamiento de Othón P. Blanco	Chetumal, Quintana Roo	Government sector	Municipal
3	570; 840; 1140	Tapia-Tussel	Dr. Raúl Tapia Tussel	Potential uses	Researcher	Generation of biofuels. Biogas.	CICY	Mérida, Yucatán	Academic sector
1	200	Téllez-Magaña	Jesús Téllez Magaña	Comprehensive attention	Coordinator of new projects	NA	Grupo Transportación Marítima Mexicana (TMM)	Ciudad de México	Private sector	Company
NA		Tenorio-Meyer	Pedro Israel Tenorio Meyer	Comprehensive attention	Sargassum Attention Operations Coordinator	NA	Ayuntamiento de Solidaridad, Quintana Roo	Playa del Carmen, Quintana Roo	Government sector	Municipal
NA		Thome-Ortiz	Dra. Patricia Thome Ortiz	Socio-economic and environmental impacts	Researcher	Stress responses in marine microorganisms	Unidad Académica de Sistemas Arrecifales UNAM	Puerto Morelos, Quinta Roo	Academic sector
NA		Toledo-Pineda	Teniente y Biol. Andrea Toledo Pineda	Comprehensive attention	Head of the Department Management and Environmental Biological Programs	NA	SEMAR, CDMX	Ciudad de México	Government sector	Federal
NA		Trasviña-Castro	Dr. Armando Trasviña-Castro	Monitoring, modeling and early warning	Researcher	Observational dynamic oceanography. Coastal circulation and mesoscale dynamics	CICESE	Ensenada, Baja California	Academic sector
1	1300	Trejo-Estrada	Dr. Sergio Trejo Estrada	Potential uses	Researcher	Applied biotechnology	CIBA IPN Unidad Tlaxcala	Tlaxcala, Estado de Mexico	Academic sector
NA		Trigueros-Fausto	Regina Trigueros Fausto	Containment, harvest, and disposal	Director of Comprehensive Waste Management	NA	SEMARNAT, CDMX	Ciudad de México	Government sector	Federal
NA		Tuz-Sulub	Dr. Armin Nasario Tuz Sulub	Socio-economic and environmental impacts	Researcher	Lobster biology	SISAL, UNAM	Sisal, Yucatán	Academic sector
1	1300	Tzeek-Tuz	Miriam Tzeek Tuz	Socio-economic and environmental impacts	President of the State Committee of Sea Turtles of Quintana Roo	NA	Ayuntamiento Benito Juárez	Tulum, Quintana Roo	Civil society	NGO
5	150; 1330; 1440; 1500; 1880	Uribe-Martínez	Abigail Uribe Martínez	Monitoring, modeling and early warning	Researcher	Marine remote sensing	SISAL, UNAM	Sisal, Yucatán	Academic sector
12	800; 840; 1000; 1100; 1110; 1150; 1220; 1300; 1330; 1450; 1630; 1930	van Tussenbroek	Dra. Brigitta van Tussenbroek	Socio-economic and environmental impacts	Researcher	Population and community ecology of macroalgae and seagrasses	Unidad Académica de Sistemas Arrecifales UNAM	Puerto Morelos, Quinta Roo	Academic sector
4	1210; 1300; 1460; 1530; 1840	Vázquez-Delfín	Dra. Erika Vázquez Delfín	Potential uses	Researcher	Phycology. Seaweed Uses	CINVESTAV, Mérida	Mérida, Yucatán	Academic sector
NA		Vázquez-Pérez	Addy Vázquez Pérez	Socio-economic and environmental impacts	Director	NA	Condominio Maestro Mayakoba A.C.	Playa del Carmen, Quintana Roo	Private sector	Real state
2	440; 730	Vázquez-Sánchez	Omar Vázquez Sánchez	Potential uses	Company founder	NA	Blue Green Mexico	Puerto Morelos, Quinta Roo	Private sector	Company
4	860; 880; 940; 1100	Vega-Zepeda	M. en C. Alejandro Vega Zepeda	Socio-economic and environmental impacts	Researcher	Ecology of coral reefs, coastal ecosystems, evaluation of natural and anthropogenic impacts	ECOSUR Chetumal	Chetumal, Quintana Roo	Academic sector
2	1280; 1300	Velázquez-Olimán	Dra. Guadalupe Velázquez Olimán	Restoration	Researcher	NA	Centro de Innovación e Investigación para el Desarrollo Sustentable A.C.	Puerto Morelos, Quinta Roo	Civil society	NGO
1	520	Vera-Vital	Deemian Enrique Vera Vital	Potential uses	Press/Advertising	NA	Grupo Dakatso de México S. A. de C. V.	Cancún, Quintana Roo	Private sector	Company
1	1410	Villalobos-Rocha	Juan Carlos Villalobos Rocha	Potential uses	Researcher	Microbiology. Production of bioethanol from sargassum	Escuela Nacional de Ciencias Biológicas (ENCB)	Ciudad de México	Academic sector
1	1760	Villanueva-Arcos	Efraín Villanueva Arcos	Monitoring, modeling and early warning	Secretary of the ecology and environment secretariat	NA	SEMA, Quintana Roo	Chetumal, Quintana Roo	Government sector	State
3	1300; 1860; 1880	Zavala-Hidalgo	Dr. Jorge Zavala Hidalgo	Monitoring, modeling and early warning	Researcher	Physical oceanography. Numerical models	Centro de Ciencias de la Atmósfera, UNAM	Ciudad de México	Academic sector
